# Supplementary material for: Effects of the expansion of doctors’ offices adjacent to private pharmacies in Mexico: secondary data analysis of a national survey
Source: PubMed Central journal article supplement — BMJ Open. 2014 May 22;4(5):e004669. doi: 10.1136/bmjopen-2013-004669 (PMC4039785; doi:10.1136/bmjopen-2013-004669), 2014-05-22
Supplement: bmjopen-2013-004669.reviewer_comments.pdf [file bmjopen-2013-004669.reviewer_comments.pdf]

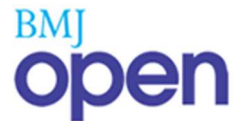

**EFFECTS OF THE EXPANSION OF DOCTORS' OFFICES  
ADJACENT TO PRIVATE PHARMACIES IN MEXICO: ANALYSIS  
OF A NATIONAL SURVEY**

|                                 |                                                                                                                                                                                                                                                                                                                                                                                                                                                                                                                                                                                                                                                                    |
|---------------------------------|--------------------------------------------------------------------------------------------------------------------------------------------------------------------------------------------------------------------------------------------------------------------------------------------------------------------------------------------------------------------------------------------------------------------------------------------------------------------------------------------------------------------------------------------------------------------------------------------------------------------------------------------------------------------|
| Journal:                        | <i>BMJ Open</i>                                                                                                                                                                                                                                                                                                                                                                                                                                                                                                                                                                                                                                                    |
| Manuscript ID:                  | bmjopen-2013-004669                                                                                                                                                                                                                                                                                                                                                                                                                                                                                                                                                                                                                                                |
| Article Type:                   | Research                                                                                                                                                                                                                                                                                                                                                                                                                                                                                                                                                                                                                                                           |
| Date Submitted by the Author:   | 12-Dec-2013                                                                                                                                                                                                                                                                                                                                                                                                                                                                                                                                                                                                                                                        |
| Complete List of Authors:       | Pérez-Cuevas, Ricardo; Inter-American Development Bank, Division of Social Protection and Health<br>Doubova, Svetlana; Mexican Institute of Social Security, Epidemiology and Health Services Research Unit, CMN Siglo XXI<br>Wirtz, Veronika; Boston University, Center for Global Health and Development ; National Institute of Public Health, Centre for Health Systems Research<br>Serván-Mori, Edson; National Institute of Public Health, Centre for Health Systems Research<br>Dreser, Anahí; National Institute of Public Health, Center for Health Systems Research<br>Hernández-Ávila, Mauricio; National Institute of Public Health, General Direction |
| <b>Primary Subject Heading</b>: | Health services research                                                                                                                                                                                                                                                                                                                                                                                                                                                                                                                                                                                                                                           |
| Secondary Subject Heading:      | Health policy                                                                                                                                                                                                                                                                                                                                                                                                                                                                                                                                                                                                                                                      |
| Keywords:                       | Quality in health care < HEALTH SERVICES ADMINISTRATION & MANAGEMENT, Organisation of health services < HEALTH SERVICES ADMINISTRATION & MANAGEMENT, PRIMARY CARE                                                                                                                                                                                                                                                                                                                                                                                                                                                                                                  |
|                                 |                                                                                                                                                                                                                                                                                                                                                                                                                                                                                                                                                                                                                                                                    |

SCHOLARONE™  
Manuscripts

1  
2  
3  
4  
5  
6  
7  
8  
9  
10  
11  
12  
13  
14  
15  
16  
17  
18  
19  
20  
21  
22  
23  
24  
25

## EFFECTS OF THE EXPANSION OF DOCTORS' OFFICES ADJACENT TO PRIVATE PHARMACIES IN MEXICO: ANALYSIS OF A NATIONAL SURVEY

**Corresponding author:** \*Anahí Dreser. Instituto Nacional de Salud Pública.

Avenida Universidad 655, Cuernavaca, Morelos 62100, México. Email:

[anahi.dreser@insp.mx](mailto:anahi.dreser@insp.mx). Telephone +52 (777) 329-3000 ext. 5309.

**Authors:** Ricardo Pérez-Cuevas <sup>(1)</sup>, Svetlana V. Doubova <sup>(2)</sup>, Veronika J. Wirtz <sup>(3,4)</sup>, Edson Serván-Mori <sup>(4)</sup> Anahí Dreser <sup>(4)</sup>\*, Mauricio Hernández-Ávila <sup>(5)</sup>

(1) Division of Social Protection and Health, Inter-American Development Bank, Mexico, D.F., Mexico

(2) Epidemiology and Health Services Research Unit, CMN Siglo XXI, Mexican Institute of Social Security, Mexico, D.F., Mexico

(3) Center for Global Health and Development (CGHD), Boston University, Boston, MA

(4) Centre for Health Systems Research, National Institute of Public Health, Cuernavaca, Mexico.

(5) General Director, National Institute of Public Health, Cuernavaca, Mexico.

**Running title:** Doctors' offices adjacent to private pharmacies in Mexico

**Keywords:** *Community pharmacy, Physician prescribing patterns, Conflict of interest, Health expenditures, Mexico.*

**Word count:** 3, 826

## ABSTRACT

**Background:** In Mexico, despite high health insurance coverage by public institutions, a high percentage of self-medication remains and most medicines are being paid for out-of-pocket. In 2010, the Mexican government enacted a policy for antibiotic sales with prescription only. As a consequence, the number of doctors' offices adjacent to private pharmacies (DAPPs) skyrocketed.

**Objectives:** To understand this phenomenon, we compared the sociodemographic characteristics, reasons for attending these services, perception of quality, and associated out-of-pocket expenditures of DAPPs users with users of Social Security (SS), Ministry of Health (MoH), private doctor's offices independent from pharmacies, and non-users.

**Design:** A secondary data analysis of the 2012 National Survey of Health and Nutrition was conducted.

**Participants:** The study population was comprised of 25,852 individuals identified as having had a health problem in the 15 days before the survey, and a random sample of 12,799 ambulatory health services users.

**Outcome measures:** The outcomes were sociodemographic characteristics, reasons for attending healthcare services, perception of quality, and associated out-of-pocket expenditures.

**Results:** The distribution of users was as follows: DAPPs (9.2%), SS (16.1%), MoH (20.9%), private providers (15.4%) and 38.5% nonusers; 65% of DAPPs users were affiliated with a public institution (MoH 35%, SS 30%) and 35% reported not having health coverage. DAPPs services were considered

1  
2  
3 inexpensive, convenient, and with a short waiting time. DAPPs users received  $\geq 3$   
4  
5 medications more often (67%) than users of private doctors (56%) and public  
6  
7 institutions (SS 54%; MoH 45%). DAPPs users spent more money on medicines  
8  
9 than users of public services.  
10  
11

**Conclusions:** DAPPs have a negative impact on the financial protection policies  
12  
13 due to out-of-pocket spending. The high number of medicines prescribed raises  
14  
15 questions in regard to the quality of care of DAPPs, which may arise from the  
16  
17 conflict of interest implicit in the linkage of prescribing and dispensing processes.  
18  
19  
20  
21  
22  
23  
24  
25  
26  
27  
28  
29  
30  
31  
32  
33  
34  
35  
36  
37  
38  
39  
40  
41  
42  
43  
44  
45  
46  
47  
48  
49  
50  
51  
52  
53  
54  
55  
56  
57  
58  
59  
60

## STRENGTHS AND LIMITATIONS OF THIS STUDY

- This study is the first that uses nationally representative household data to analyse the characteristics of users of doctors' offices adjacent to private pharmacies (DAPPs), their reasons to attend, perception of quality, and associated out-of-pocket expenditures, and runs a comparative analysis with users of other healthcare services.
- This study identified that users of DAPPS: paid out-of-pocket for medical visits and medications, therefore counteracting financial protection policies, and received, on average, higher number of medicines prescribed than users of other healthcare institutions, thus signalling poorer quality of care; For DAPPs medical doctors this situation reflects a conflict of interest given that they work for the pharmacies.
- The main limitation is that this study is a secondary data analysis, thus with the available information it was not possible to evaluate in-depth the quality of care.

## BACKGROUND

In the past decade in Mexico, recognition of inequity in health, disparities in access and utilization of health services, and differences in resource allocation and health expenditures fuelled the implementation of the System for Social Protection of Health (SSPH). The SSPH aims at achieving universal healthcare coverage and financial protection for the population without Social Security. However, in 2010—8 years after its inception—the Mexican total health expenditure accounted for only 6.2% of the gross domestic product [1] from which more than half (51.7%) is financed through out-of-pocket expenditures. Among OECD countries, Mexico's income inequality is the highest. [2]

The complexity of the Mexican healthcare system challenges the success of health policies because the healthcare sector comprises segmented public and private healthcare systems with little interaction. The public sector covers an estimated 78.6% of Mexico's population (~112 million). All formal labour market and government employees receive healthcare from the Social Security institutions (SS), whereas most of the population without social security receives healthcare from the Ministry of Health (MoH), which comprises each of the 32 decentralized MoH facilities in every Mexican state. The private sector provides care for the uninsured population and for up to 31% of those insured who choose to use this system for ambulatory care.

Reaching universal coverage is expected to improve access and protect the population from the financial burden of healthcare. To accomplish these endeavours, the SSPH, which is a non-contributory social health insurance

1  
2  
3 program, includes access to ambulatory and hospital healthcare in public  
4 institutions and provision of no-cost prescribed medications at the point of care.  
5  
6 This represents actual financial protection, particularly for low-income groups. [3]  
7  
8 SSPH was launched in 2002. By 2011, the program reached 52.6 million affiliates  
9  
10 and the benefit package increased from 91 to 284 interventions. This package  
11  
12 covers the treatment of ~95% of the causes of visits in primary care clinics and  
13  
14 admissions to general hospitals [4]. During the same period, the proportion of  
15  
16 patients reporting complete provision of medications at the MoH facilities increased  
17  
18 from 55% to 62%, whereas in the SS the increase was from 70% to 87%.[4]  
19  
20

21  
22 Despite the progress, Mexican policies on access to healthcare and, in particular,  
23  
24 to medications still stand at a crossroad and deserve careful analysis. The  
25  
26 availability of medicines is a key determinant of access to and utilization of health  
27  
28 services. In Mexico, most medications are being paid for with private resources  
29  
30 (mostly out-of-pocket) despite the important public investment in healthcare. A  
31  
32 recent report has emphasized that for every Mx\$100 spent on medications, Mx\$79  
33  
34 is being paid with private resources and only Mx\$21 with public funds. [5]  
35  
36 Furthermore, in 2010 the Mexican authorities enacted a prescription-only  
37  
38 requirement policy to enforce the regulation to sell antibiotics only with a medical  
39  
40 prescription. This policy, aimed at mitigating self-medication, had the unintended  
41  
42 consequence of boosting private ambulatory healthcare in the form of doctor's  
43  
44 offices adjacent to private pharmacies (DAPPs). [6]  
45  
46  
47  
48  
49  
50  
51

52  
53 Indeed, since a decade ago, a small number of DAPPs began to operate in some  
54  
55 low-cost pharmacy chains but soon after the publication of the antibiotics' policy, a  
56  
57 growing number of DAPPs have been observed nationwide. This emergent  
58  
59  
60

1  
2  
3 phenomenon questions the success of current health policies focused on universal  
4 coverage for healthcare and signals the unbalance of the supply and demand for  
5 ambulatory healthcare and medicines in the public sector. Furthermore, DAPPs  
6 challenges current regulations and norms for doctors' offices and private  
7 pharmacies.  
8  
9

10 The policies to improve access to medicines and safe prescriptions face multiple  
11 challenges such as the conflict of interest and may have unanticipated results. Until  
12 recently, in Japan and United States, [7] Korea [8] and China [9, 10] among other  
13 countries, [11] medical doctors and pharmacists were allowed to prescribe and  
14 dispense medicines. Such practices contributed to high medicine utilization; almost  
15 50% of the revenues of medical doctors and pharmacists came from  
16 pharmaceuticals. [9] Due to the financial incentive, more medicines were  
17 dispensed and their selection was influenced by factors other than their quality or  
18 cost-effectiveness. The recognition of this problem encouraged the introduction of  
19 reforms aimed at separating medicine prescribing and dispensing. In some  
20 countries this strategy decreased the irrational use of medicines [12] although in  
21 other countries it provoked the practice that health providers hired onsite  
22 pharmacists. [13] Because the provider paid a salary to the pharmacists, the  
23 provider's incentives and irrational prescription patterns remained unchanged.  
24  
25  
26  
27  
28  
29  
30  
31  
32  
33  
34  
35  
36  
37  
38  
39  
40  
41  
42  
43  
44  
45  
46  
47

48 In Mexico, expansion of DAPPs indicates that prescribing and dispensing of  
49 medicines are strongly related instead of being separated as the international  
50 experience suggests. To better understand this situation, the objectives of this  
51 study were to compare DAPPs users with users of other services in terms of their  
52  
53  
54  
55  
56  
57  
58  
59  
60



1  
2  
3 characteristics, reasons for attending specific services, perception of quality, and  
4  
5 associated out-of-pocket expenditures.  
6  
7

## 8 9 10 **METHODS**

### 11 **Data source**

12  
13 This study is a secondary data analysis of the 2012 National Survey of Health and  
14  
15 Nutrition (ENSANUT 2012). [14] ENSANUT is a complex survey, which is  
16  
17 representative at the national, state and urban-rural stratum levels. It was designed  
18  
19 to collect data on different health and nutrition conditions and the utilization of  
20  
21 ambulatory and hospital care services. ENSANUT 2012 was applied to 194,923  
22  
23 individuals in 50,528 households (response rate of 87%). It was sampled through a  
24  
25 probabilistic multistage process. The specific details on the sampling approach of  
26  
27 ENSANUT 2012 are published elsewhere. [14]  
28  
29

30  
31 To collect the information for the ENSANUT survey, previously trained interviewers  
32  
33 carried out direct, structured face-to-face interviews with key household informants  
34  
35 and health services users. The interviewers used the questionnaires that were  
36  
37 applied in ENSANUT 2000 and 2006: household, health services use, children,  
38  
39 adolescents and adults.  
40  
41  
42  
43  
44  
45  
46  
47

### 48 **Study population, variables and statistical analysis**

49  
50 The present study analysed the information from the household and health  
51  
52 services use questionnaires of ENSANUT 2012. Figure 1 depicts selection of the  
53  
54 study population.  
55  
56  
57  
58  
59  
60

Figure 1. Selection of study population

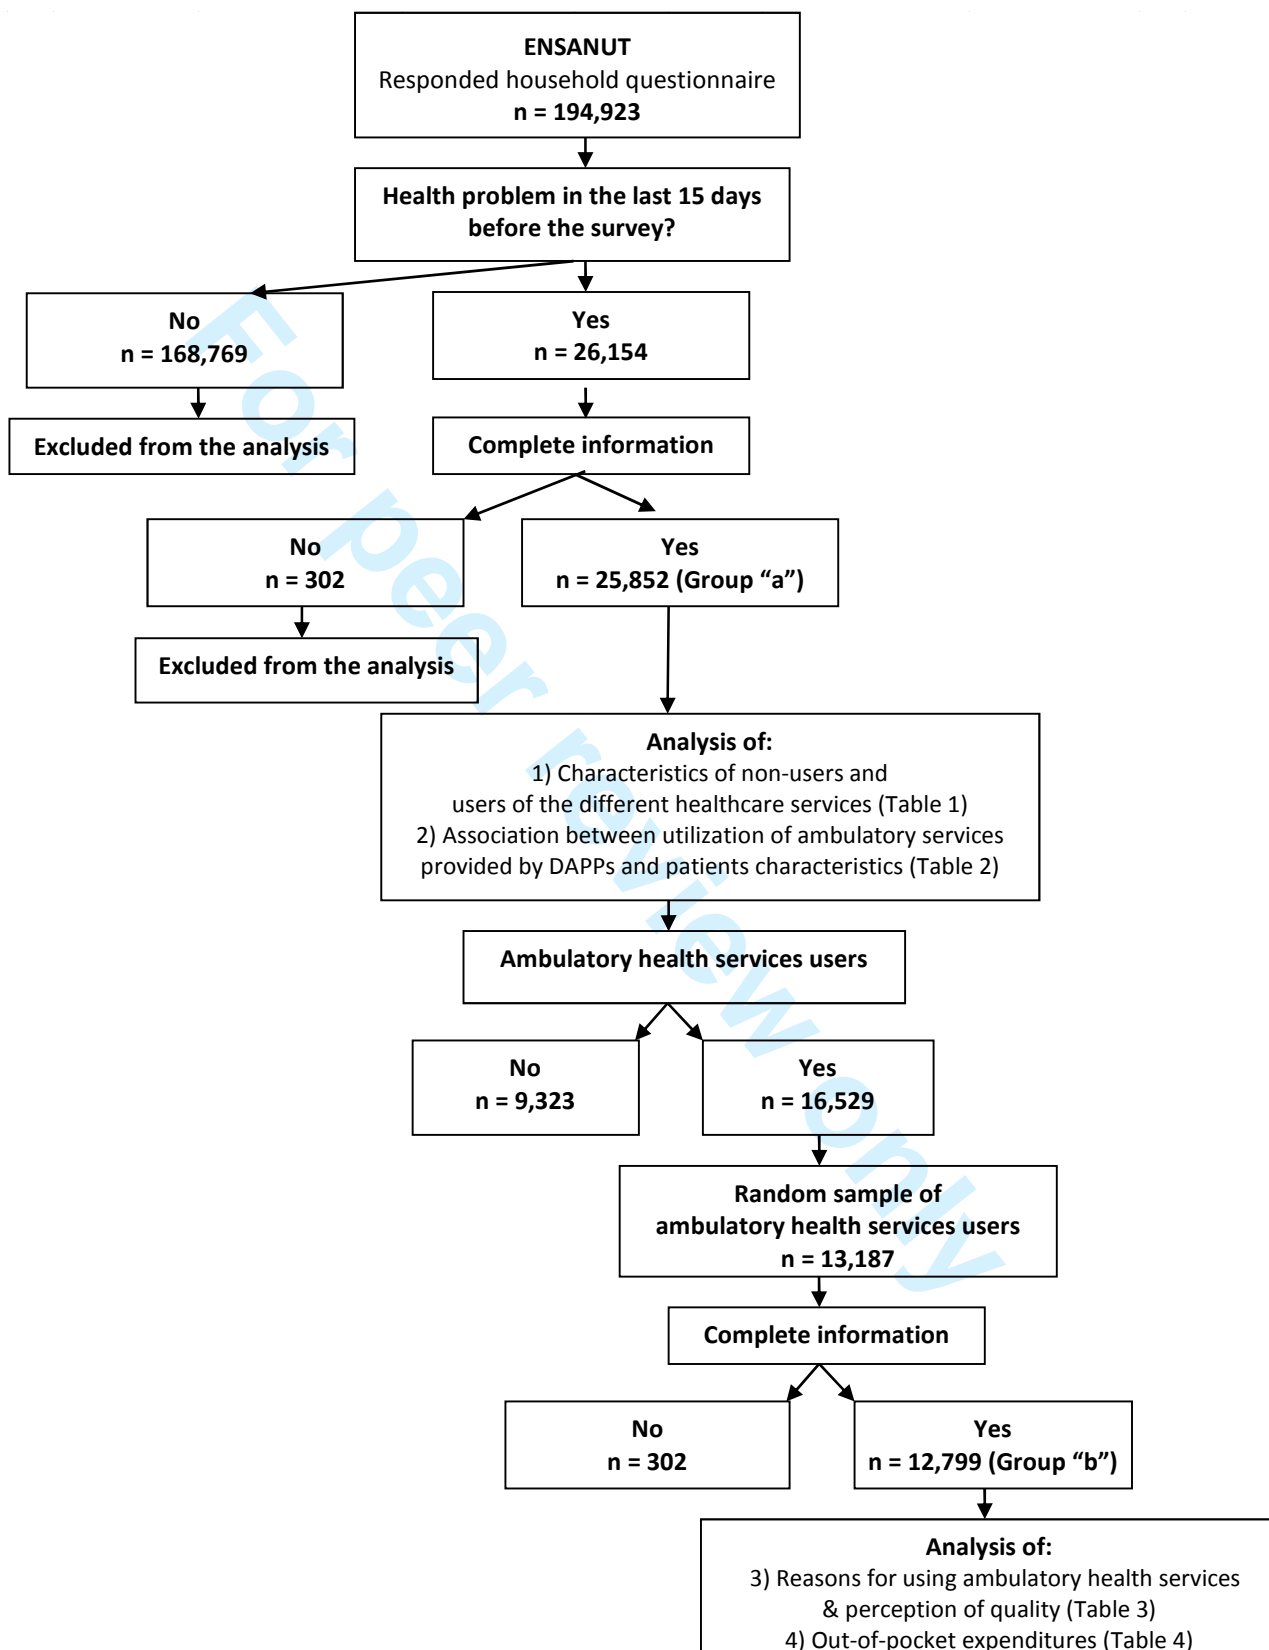

1  
2  
3 Two groups integrated the study population: a) individuals identified as having had  
4 a health problem within 15 days before the survey according to the household  
5 questionnaire and b) a random sample of ambulatory health services users who  
6 answered the health services questionnaire. The number of individuals who had a  
7 health problem was obtained as follows: from the total number of survey  
8 participants (194,923 individuals), 26,154 (13.4%) reported having a health  
9 problem; after excluding the questionnaires with incomplete information, the final  
10 sample was 25,852 individuals. Thus, the non-response rate was 1.2%. Following  
11 the same logic, 13,187 health services users were chosen; 12,799 had complete  
12 information and 388 (2.9%) did not.

13  
14  
15 In group “a” we identified five categories of users of healthcare services: 1) doctors’  
16 offices adjacent to private pharmacies (DAPPs), 2) SS facilities, 3) MoH facilities,  
17 4) offices of private doctors independent from pharmacies, and 5) non-users or  
18 those who reported consulting with a friend, neighbour, family member,  
19 homeopaths or other healers.

20  
21  
22 Data analysis was performed in two stages. In the first stage, the sample “a”  
23 served to describe the sociodemographic characteristics and identify the factors  
24 associated with the use of DAPPs in comparison to the use of other health services  
25 or no use. The analysis included the variables that the literature suggests as  
26 related to the use of health services: [15-17] sex (male or female), age group (0-9  
27 years, 10-19 years, 20-64 years and  $\geq 65$  years), and years of schooling (0, 1-6, 7-  
28 9, and  $\geq 10$ ). The variable of years of schooling was obtained directly from the  
29 interview data for subjects 15 years of age and older, and for individuals younger  
30 than 15 years the mean of years of schooling of the household members was

1  
2  
3 used. Other analysed variables were place of residence (rural, urban or  
4 metropolitan), ethnicity of the head of household, [18] degree of marginalization  
5 (very low/low, middle, high/very high that was based on family reported income),  
6 [19] type of medical insurance (SS, SSPH, private or none) and socioeconomic  
7 status (SES). The SES was determined classifying the population in quintiles; the  
8 information to ascertain the SES included possession of different assets, services  
9 and characteristics of the household infrastructure. [20, 21] The SES index was  
10 constructed using a principal components analysis with polychoric correlation  
11 matrices. Additionally, type of health problem (acute, chronic or other) and  
12 perception of severity (mild or moderate/severe) of health problem were analysed.  
13  
14  
15  
16  
17  
18  
19  
20  
21  
22  
23  
24  
25  
26  
27  
28

29 The factors associated with the use of a specific healthcare provider were  
30 modelled using a multinomial logistic regression [22] in which the dependent  
31 variable included the five categories of health services users. The non-users, which  
32 represented 38.5% of the sample, were used as the reference category. In addition  
33 to the sociodemographic characteristics, the model was adjusted for the  
34 geographic region of state of residence (Northwest, Northeast, Central-North, East,  
35 West, Central-South, Southwest, Southeast). The results were reported in odds  
36 ratios (OR). The hypothesis tests on the OR estimated were performed at 1, 5 and  
37 10% confidence levels. We report various statistical goodness of fit and reliability of  
38 the estimated models [Akaike criteria (AIC), log-likelihood,  $LR-\chi^2$ , and  $R^2$ -  
39 McFadden].  
40  
41  
42  
43  
44  
45  
46  
47  
48  
49  
50  
51  
52  
53  
54  
55  
56  
57  
58  
59  
60

1  
2  
3 The second stage of the analysis focused on sample “b” of health services users.  
4  
5 Participants in this part of the survey were asked about the characteristics of the  
6  
7 healthcare received and their perceptions of the quality of care. The descriptive  
8  
9 analysis comprised the main reasons for using specific healthcare services, the  
10  
11 percentage of users who received information about their diagnosis, number of  
12  
13 prescribed medicines (0, 1, 2, or 3 or more), percentage of users who received and  
14  
15 understood the information about prescribed medicines, perception regarding the  
16  
17 quality of care received, willingness to return to the same healthcare institution in  
18  
19 the future, and reasons for dissatisfaction with health care (e.g., lack of  
20  
21 improvement in health, high costs, remote services, long waiting time). We also  
22  
23 analysed out-of-pocket expenditures for transportation from home to healthcare  
24  
25 facilities, healthcare visits and medicines. The amount was reported in local  
26  
27 currency (Mexican pesos). To estimate the median and interquartile range (IQR) of  
28  
29 waiting time and out-of-pocket expenditures by type of health care provider, the  
30  
31 quantile regression model at the population level was utilized. All statistical  
32  
33 analyses were performed using the statistical package STATA 12.1.  
34  
35  
36  
37  
38  
39  
40  
41  
42

## 43 RESULTS

44  
45  
46  
47 Table 1 summarizes the characteristics of users of different healthcare services.  
48  
49 Overall, 61.5% of participants who were reported to have had a health problem  
50  
51 seek care with a health provider according to the following distribution: MoH  
52  
53 (20.9%), SS (16.1%), private providers (15.4%) and DAPPs (9.2%).  
54  
55  
56  
57  
58  
59  
60

**Table 1. Characteristics of users and non-users of the different healthcare services, Mexico 2012\***

|                                          | National         | DAPPs            | Social Security  | Ministry of Health | Private doctors  | Non-users           | <i>p-value corrected by survey design effect</i> |
|------------------------------------------|------------------|------------------|------------------|--------------------|------------------|---------------------|--------------------------------------------------|
| Observations                             |                  |                  |                  |                    |                  |                     |                                                  |
| Sample                                   | 194,923          | 2,387            | 4,148            | 5,390              | 3,976            | 9,951               |                                                  |
| %                                        | 100              | 9.2              | 16.1             | 20.9               | 15.4             | 38.5                |                                                  |
| Weighted                                 | 115,170,278      | 1,715,838        | 2,775,195        | 2,709,387          | 2,884,34         | 5,967,254           |                                                  |
| %                                        | 100              | 10.7             | 17.3             | 16.9               | 18.0             | 37.2                |                                                  |
| <b>Estimation [95% CI]</b>               |                  |                  |                  |                    |                  |                     |                                                  |
| Sex                                      |                  |                  |                  |                    |                  |                     |                                                  |
| Female                                   | 0.51 [0.51,0.51] | 0.55 [0.53,0.58] | 0.59 [0.57,0.61] | 0.60 [0.58,0.61]   | 0.55 [0.53,0.57] | 0.54 [0.52,0.55]    | 0.000                                            |
| Male                                     | 0.49 [0.49,0.49] | 0.45 [0.42,0.48] | 0.41 [0.39,0.43] | 0.40 [0.39,0.42]   | 0.45 [0.43,0.47] | 0.46 [0.45,0.48]    |                                                  |
| Years of age                             |                  |                  |                  |                    |                  |                     |                                                  |
| 0-9                                      | 0.19 [0.19,0.20] | 0.35 [0.32,0.38] | 0.18 [0.17,0.20] | 0.29 [0.27,0.31]   | 0.31 [0.29,0.33] | 0.20 [0.19,0.21]    | 0.000                                            |
| 10-19                                    | 0.20 [0.20,0.20] | 0.16 [0.15,0.19] | 0.09 [0.08,0.11] | 0.14 [0.12,0.15]   | 0.12 [0.11,0.13] | 0.16 [0.16,0.17]    |                                                  |
| 20-64                                    | 0.55 [0.54,0.55] | 0.44 [0.41,0.47] | 0.56 [0.54,0.59] | 0.47 [0.45,0.49]   | 0.48 [0.46,0.50] | 0.56 [0.55,0.57]    |                                                  |
| ≥65                                      | 0.06 [0.06,0.06] | 0.05 [0.04,0.06] | 0.16 [0.14,0.18] | 0.10 [0.09,0.12]   | 0.10 [0.08,0.11] | 0.08 [0.07,0.09]    |                                                  |
| Years of schooling                       |                  |                  |                  |                    |                  |                     |                                                  |
| 0                                        | 0.12 [0.11,0.12] | 0.13 [0.11,0.15] | 0.12 [0.11,0.14] | 0.20 [0.18,0.21]   | 0.14 [0.13,0.16] | 0.14 [0.13,0.15]    | 0.000                                            |
| 1-6                                      | 0.35 [0.34,0.35] | 0.39 [0.36,0.43] | 0.35 [0.33,0.37] | 0.42 [0.40,0.45]   | 0.33 [0.31,0.36] | 0.36 [0.35,0.38]    |                                                  |
| 7-9                                      | 0.26 [0.25,0.26] | 0.24 [0.22,0.27] | 0.22 [0.20,0.24] | 0.23 [0.21,0.25]   | 0.18 [0.16,0.20] | 0.25 [0.23,0.26]    |                                                  |
| ≥10                                      | 0.17 [0.17,0.18] | 0.16 [0.14,0.19] | 0.19 [0.17,0.21] | 0.11 [0.10,0.13]   | 0.18 [0.16,0.20] | 0.25 [0.23,0.27]    |                                                  |
| Place of residence                       |                  |                  |                  |                    |                  |                     |                                                  |
| Rural                                    | 0.23 [0.22,0.23] | 0.11 [0.09,0.13] | 0.09 [0.08,0.11] | 0.39 [0.36,0.42]   | 0.18 [0.16,0.20] | 0.24 [0.22,0.26]    | 0.000                                            |
| Urban or metropolitan                    | 0.77 [0.77,0.78] | 0.89 [0.87,0.91] | 0.91 [0.89,0.92] | 0.61 [0.58,0.64]   | 0.82 [0.80,0.84] | 0.76 [0.74,0.78]    |                                                  |
| Locality deprivation level               |                  |                  |                  |                    |                  |                     |                                                  |
| Very low/low                             | 0.67 [0.65,0.69] | 0.81 [0.78,0.84] | 0.86 [0.84,0.88] | 0.50 [0.47,0.53]   | 0.73 [0.70,0.75] | 0.65 [0.63,0.68]    | 0.000                                            |
| Middle                                   | 0.11 [0.10,0.13] | 0.10 [0.08,0.12] | 0.08 [0.06,0.10] | 0.14 [0.12,0.16]   | 0.11 [0.09,0.14] | 0.12 [0.10,0.14]    |                                                  |
| High/very high                           | 0.22 [0.21,0.24] | 0.09 [0.07,0.11] | 0.06 [0.05,0.08] | 0.36 [0.33,0.39]   | 0.16 [0.14,0.18] | 0.23 [0.21,0.26]    |                                                  |
| Ethnicity: Indigenous                    | 0.10 [0.09,0.11] | 0.03 [0.02,0.04] | 0.04 [0.03,0.05] | 0.12 [0.10,0.14]   | 0.06 [0.05,0.08] | 0.09 [0.07,0.10]    | 0.000                                            |
| Quintile of socioeconomic status         |                  |                  |                  |                    |                  |                     |                                                  |
| 1 <sup>st</sup>                          | 0.15 [0.14,0.16] | 0.08 [0.06,0.11] | 0.04 [0.03,0.05] | 0.25 [0.22,0.27]   | 0.08 [0.07,0.09] | 0.17 [0.15,0.18]    | 0.000                                            |
| 2 <sup>nd</sup>                          | 0.17 [0.16,0.17] | 0.19 [0.16,0.21] | 0.11 [0.10,0.12] | 0.26 [0.24,0.28]   | 0.12 [0.10,0.13] | 0.21 [0.19,0.23]    |                                                  |
| 3 <sup>rd</sup>                          | 0.19 [0.18,0.20] | 0.22 [0.19,0.26] | 0.19 [0.18,0.21] | 0.20 [0.18,0.22]   | 0.16 [0.14,0.17] | 0.20 [0.19,0.22]    |                                                  |
| 4 <sup>th</sup>                          | 0.22 [0.21,0.23] | 0.26 [0.23,0.30] | 0.26 [0.23,0.28] | 0.17 [0.15,0.19]   | 0.25 [0.22,0.27] | 0.19 [0.18,0.21]    |                                                  |
| 5 <sup>th</sup>                          | 0.27 [0.26,0.28] | 0.24 [0.21,0.28] | 0.40 [0.37,0.43] | 0.12 [0.11,0.14]   | 0.40 [0.37,0.43] | 0.23 [0.21,0.25]    |                                                  |
| Medical Insurance (MI)                   |                  |                  |                  |                    |                  |                     |                                                  |
| Social Security                          | 0.37 [0.37,0.38] | 0.30 [0.27,0.33] | 0.94 [0.93,0.95] | 0.07 [0.06,0.08]   | 0.39 [0.37,0.42] | 0.31 [0.30,0.33]    | 0.000                                            |
| SSPH                                     | 0.37 [0.36,0.38] | 0.35 [0.32,0.39] | 0.03 [0.02,0.04] | 0.81 [0.79,0.83]   | 0.26 [0.24,0.28] | 0.41 [0.40,0.43]    |                                                  |
| Private insurance                        | 0.00 [0.00,0.01] | 0.00 [0.00,0.00] | 0.00 [0.00,0.00] | ----               | 0.02 [0.01,0.03] | 0.003 [0.001,0.005] |                                                  |
| No MI                                    | 0.25 [0.25,0.26] | 0.35 [0.32,0.39] | 0.03 [0.02,0.03] | 0.12 [0.11,0.14]   | 0.33 [0.31,0.36] | 0.27 [0.26,0.28]    |                                                  |
| Type of health problem                   |                  |                  |                  |                    |                  |                     |                                                  |
| Acute health problems                    | 0.73 [0.72,0.74] | 0.80 [0.78,0.83] | 0.59 [0.56,0.61] | 0.66 [0.64,0.68]   | 0.71 [0.69,0.73] | 0.81 [0.80,0.82]    | 0.000                                            |
| Chronic health problems                  | 0.18 [0.17,0.19] | 0.14 [0.12,0.16] | 0.30 [0.28,0.32] | 0.24 [0.23,0.26]   | 0.20 [0.18,0.22] | 0.10 [0.09,0.11]    |                                                  |
| Other health problems                    | 0.09 [0.09,0.10] | 0.06 [0.04,0.07] | 0.12 [0.10,0.13] | 0.10 [0.09,0.11]   | 0.09 [0.08,0.10] | 0.09 [0.08,0.10]    |                                                  |
| Perception of severity of health problem |                  |                  |                  |                    |                  |                     |                                                  |
| Mild                                     | 0.48 [0.47,0.49] | 0.44 [0.41,0.47] | 0.37 [0.35,0.39] | 0.40 [0.38,0.42]   | 0.36 [0.34,0.38] | 0.64 [0.62,0.65]    | 0.000                                            |
| Moderate/severe                          | 0.52 [0.51,0.53] | 0.56 [0.53,0.59] | 0.63 [0.61,0.65] | 0.60 [0.58,0.62]   | 0.64 [0.62,0.66] | 0.36 [0.35,0.38]    |                                                  |

Difference estimates performed considering the effect of the survey design.

1  
2  
3 When the sample was stratified by insurance coverage, the results showed that a  
4 significant percentage of users with SS or SSPH insurance attended private  
5 services or DAPPs. Among DAPPs users, 30% and 35% reported as having SS or  
6  
7  
8  
9  
10  
11  
12  
13  
14  
15  
16  
17  
18  
19  
20  
21  
22  
23  
24  
25  
26  
27  
28  
29  
30  
31  
32  
33  
34  
35  
36  
37  
38  
39  
40  
41  
42  
43  
44  
45  
46  
47  
48  
49  
50  
51  
52  
53  
54  
55  
56  
57  
58  
59  
60

When the sample was stratified by insurance coverage, the results showed that a significant percentage of users with SS or SSPH insurance attended private services or DAPPs. Among DAPPs users, 30% and 35% reported as having SS or SSPH coverage, respectively. Similarly, among private physician users, 39% had SS and 29% had SSPH coverage.

DAPPs users were economically better off than those who went to MoH facilities. In comparison to the users of other health services and non-users, DAPPs users were younger (51% were between 0 and 19 years old), with higher educational level than MoH users and lower educational level than SS users. Most DAPPs users (89%) lived in urban and metropolitan areas with a low level of deprivation, whereas only 61% of MoH users lived in these areas and 50% had low level of deprivation. 3% of DAPPs users were indigenous vs. 12% of indigenous users receiving care from the MoH. DAPPs users were equally distributed among the different socioeconomic levels. This is in contrast with MoH users who were concentrated according to the poorest quintiles, whereas SS and private services users were in the richest quintiles. Furthermore, acute health problems encouraged more frequent attendance to DAPPs (80%) in comparison with other groups. The users sought healthcare in the institutions in which they were affiliated if they perceived that the problem was moderate to severe.

Table 2 shows the multinomial model that confirms that users of DAPPs were younger, mostly from urban and metropolitan areas and presented an acute condition. Furthermore, those with SSPH insurance were more likely to visit DAPPs than private clinics.

**Table 2. Multinomial model of the association between utilization of services provided by DAPPs and patient characteristics, Mexico 2012**

|                                                          | Reference category: Non- users<br>Odds ratios (95% CI) reported |                             |                          |                          |
|----------------------------------------------------------|-----------------------------------------------------------------|-----------------------------|--------------------------|--------------------------|
|                                                          | DAPPs                                                           | Social Security             | Ministry of Health       | Private doctors          |
| Sex (Ref.: female)                                       |                                                                 |                             |                          |                          |
| Male                                                     | 0.863**<br>[0.786,0.947]                                        | 0.872**<br>[0.798,0.952]    | 0.798**<br>[0.742,0.859] | 0.920*<br>[0.850,0.996]  |
| Years of age (Ref.: ≥65)                                 |                                                                 |                             |                          |                          |
| ≤9                                                       | 3.739**<br>[2.986,4.683]                                        | 1.320**<br>[1.114,1.562]    | 2.061**<br>[1.771,2.398] | 2.264**<br>[1.932,2.654] |
| 10-19                                                    | 1.761**<br>[1.388,2.235]                                        | 0.623**<br>[0.514,0.754]    | 1.104<br>[0.939,1.298]   | 0.676**<br>[0.566,0.808] |
| 20-64                                                    | 1.249*<br>[1.008,1.547]                                         | 0.769**<br>[0.665,0.890]    | 0.880+<br>[0.770,1.006]  | 0.653**<br>[0.566,0.753] |
| Years of schooling (Ref.: 0 years)                       |                                                                 |                             |                          |                          |
| 1-6                                                      | 1.236+<br>[0.981,1.558]                                         | 1.067<br>[0.887,1.282]      | 1.051<br>[0.921,1.200]   | 0.917<br>[0.780,1.078]   |
| 7-9                                                      | 1.334*<br>[1.046,1.702]                                         | 1.069<br>[0.875,1.307]      | 1.050<br>[0.904,1.221]   | 1.264**<br>[1.059,1.509] |
| ≥10                                                      | 1.309*<br>[1.017,1.685]                                         | 1.054<br>[0.860,1.291]      | 1.057<br>[0.891,1.253]   | 1.581**<br>[1.316,1.898] |
| Place of residence (Ref.: urban or metropolitan)         |                                                                 |                             |                          |                          |
| Rural                                                    | 0.637**<br>[0.552,0.736]                                        | 0.838*<br>[0.732,0.959]     | 1.358**<br>[1.234,1.494] | 1.025<br>[0.918,1.145]   |
| Locality deprivation level (Ref.: low, very low level)   |                                                                 |                             |                          |                          |
| Middle                                                   | 0.818**<br>[0.703,0.952]                                        | 1.084<br>[0.936,1.256]      | 1.051<br>[0.936,1.180]   | 1.421**<br>[1.254,1.611] |
| High, very high                                          | 0.551**<br>[0.464,0.655]                                        | 0.858+<br>[0.720,1.022]     | 0.978<br>[0.869,1.102]   | 1.278**<br>[1.116,1.464] |
| Ethnicity (Ref.:non-indigenous)                          |                                                                 |                             |                          |                          |
| Indigenous                                               | 0.647**<br>[0.519,0.806]                                        | 0.959<br>[0.782,1.175]      | 1.171**<br>[1.039,1.319] | 1.014<br>[0.870,1.182]   |
| Quintile of socioeconomic status (Ref.: 5th)             |                                                                 |                             |                          |                          |
| 1st                                                      | 0.497**<br>[0.406,0.608]                                        | 0.669**<br>[0.546,0.818]    | 1.120<br>[0.957,1.311]   | 0.224**<br>[0.189,0.264] |
| 2nd                                                      | 0.834*<br>[0.712,0.977]                                         | 0.886<br>[0.764,1.028]      | 1.176*<br>[1.016,1.361]  | 0.345**<br>[0.301,0.396] |
| 3rd                                                      | 0.949<br>[0.819,1.100]                                          | 0.966<br>[0.846,1.103]      | 1.088<br>[0.940,1.258]   | 0.462**<br>[0.408,0.524] |
| 4th                                                      | 1.080<br>[0.936,1.246]                                          | 1.034<br>[0.915,1.169]      | 1.157+<br>[0.996,1.343]  | 0.711**<br>[0.633,0.799] |
| Medical insurance (Ref.: no insurance)                   |                                                                 |                             |                          |                          |
| Social Security                                          | 0.676**<br>[0.597,0.765]                                        | 27.495**<br>[22.495,33.607] | 0.514**<br>[0.440,0.599] | 0.871**<br>[0.785,0.966] |
| SSPH                                                     | 0.769**<br>[0.686,0.862]                                        | 0.802+<br>[0.625,1.029]     | 3.822**<br>[3.444,4.241] | 0.596**<br>[0.539,0.659] |
| Type of health problem (Ref.: chronic health problems)   |                                                                 |                             |                          |                          |
| Acute                                                    | 0.730**<br>[0.630,0.847]                                        | 0.298**<br>[0.264,0.336]    | 0.364**<br>[0.327,0.405] | 0.425**<br>[0.380,0.476] |
| Other                                                    | 0.566**<br>[0.451,0.710]                                        | 0.502**<br>[0.424,0.595]    | 0.435**<br>[0.376,0.504] | 0.530**<br>[0.451,0.623] |
| Perception of health problem (Ref.: mild health problem) |                                                                 |                             |                          |                          |
| Moderate/severe                                          | 2.336**<br>[2.123,2.571]                                        | 2.663**<br>[2.430,2.918]    | 2.192**<br>[2.032,2.364] | 3.044**<br>[2.802,3.307] |
| Observations                                             |                                                                 |                             |                          | 25,620                   |
| AIC                                                      |                                                                 |                             |                          | 61,461                   |
| Log likelihood                                           |                                                                 |                             |                          | -30,618                  |
| LR $\chi^2$                                              |                                                                 |                             |                          | 15,399                   |
| Prob > $\chi^2$                                          |                                                                 |                             |                          | 0.000                    |
| McFadden $R^2$                                           |                                                                 |                             |                          | 0.201                    |

Note: Persons with private medical insurance were excluded.

\*\*p<0.01, \*p<0.05; +p<0.10.



1  
2  
3 The reasons for using specific health services and perception of quality of care are  
4 presented in Table 3. The top three reasons for using DAPPs were that these  
5 services were inexpensive, conveniently located and had a short waiting time;  
6  
7  
8 whereas the main reason to use SS and MoH services was to have an affiliation  
9  
10 with such institutions. Users of private doctors mentioned more often (29%) that  
11  
12 they knew the doctor and liked the care provided as the main reasons for attending  
13  
14 the private doctor's office.  
15  
16  
17  
18  
19  
20  
21

22 Regarding the average number of medicines per encounter, DAPPs users received  
23  
24  $\geq 3$  medicines more often (67%) than users of private doctors (56%) and public  
25  
26 institutions (SS 54%; MoH 45%). A higher percentage of DAPPs and private  
27  
28 practice users received information about the diagnosis and prescribed medicines  
29  
30 than those of public institutions. DAPPs users also had better perception of the  
31  
32 quality of healthcare (good/very good quality: DAPPs 89%, private doctor 93%)  
33  
34 than other users (SS 78%; MoH 83%) and would return to the same healthcare  
35  
36 provider. The main reason for not returning to DAPPs was lack of health  
37  
38 improvement. For the SS and MoH, the reasons were long waiting time,  
39  
40 inconsiderate healthcare providers and incomplete provision of prescribed  
41  
42 medicines.  
43  
44  
45  
46  
47  
48  
49  
50  
51  
52  
53  
54  
55  
56  
57  
58  
59  
60

**Table 3. Reasons for using ambulatory health services of different providers and perception of quality, Mexico 2012\***

|                                                                      | DAPPs            | Social Security  | Ministry of Health | Private doctors   | <i>p-value corrected</i> |
|----------------------------------------------------------------------|------------------|------------------|--------------------|-------------------|--------------------------|
| Observations                                                         |                  |                  |                    |                   |                          |
| Sample                                                               | 1,778            | 3,840            | 4,569              | 2,612             | <i>by survey design</i>  |
| %                                                                    | 13.89            | 30.00            | 35.70              | 20.41             |                          |
| Weighted                                                             | 1,504,746        | 2,912,390        | 2,602,144          | 2,128,578         | <i>effect</i>            |
| %                                                                    | 16.45            | 31.84            | 28.45              | 23.27             |                          |
| <i>Estimation [95% CI]</i>                                           |                  |                  |                    |                   |                          |
| Main reasons for using specific healthcare services                  |                  |                  |                    |                   |                          |
| Having insurance                                                     | 0.01 [0.01,0.02] | 0.88 [0.87,0.90] | 0.59 [0.57,0.62]   | 0.03 [0.02,0.04]  | 0.000                    |
| Convenient to home                                                   | 0.33 [0.29,0.36] | 0.06 [0.05,0.07] | 0.25 [0.23,0.27]   | 0.17 [0.14,0.19]  | 0.055                    |
| Inexpensive                                                          | 0.34 [0.30,0.37] | 0.10 [0.09,0.12] | 0.22 [0.20,0.24]   | 0.05 [0.04,0.06]  | 0.000                    |
| Familiar with the doctor                                             | 0.08 [0.06,0.11] | 0.02 [0.01,0.03] | 0.03 [0.02,0.04]   | 0.29 [0.26,0.32]  | 0.000                    |
| User likes care provided                                             | 0.16 [0.13,0.19] | 0.06 [0.05,0.07] | 0.08 [0.07,0.09]   | 0.28 [0.26,0.31]  | 0.000                    |
| Short waiting time                                                   | 0.27 [0.24,0.30] | 0.02 [0.02,0.03] | 0.03 [0.02,0.03]   | 0.22 [0.20,0.24]  | 0.684                    |
| Other                                                                | 0.19 [0.16,0.21] | 0.05 [0.04,0.06] | 0.10 [0.09,0.12]   | 0.24 [0.22,0.27]  | 0.000                    |
| Quality of health care                                               |                  |                  |                    |                   |                          |
| Number of prescribed medicines                                       |                  |                  |                    |                   |                          |
| 0                                                                    | 0.02 [0.01,0.03] | 0.10 [0.09,0.12] | 0.11 [0.10,0.12]   | 0.05 [0.04,0.04]  | 0.000                    |
| 1                                                                    | 0.08 [0.07,0.10] | 0.11 [0.09,0.12] | 0.12 [0.11,0.13]   | 0.10 [0.08,0.12]  |                          |
| 2                                                                    | 0.23 [0.20,0.26] | 0.25 [0.23,0.27] | 0.32 [0.30,0.34]   | 0.29 [0.27,0.32]  |                          |
| ≥3                                                                   | 0.67 [0.64,0.70] | 0.54 [0.52,0.56] | 0.45 [0.42,0.47]   | 0.56 [0.53,0.59]  |                          |
| % of users who received information about their diagnosis            | 0.90 [0.88,0.92] | 0.84 [0.83,0.86] | 0.84 [0.83,0.86]   | 0.93 [0.91,0.94]  | 0.000                    |
| % of users who received information about prescribed medications     | 0.92 [0.90,0.94] | 0.85 [0.84,0.87] | 0.87 [0.85,0.88]   | 0.94 [0.92,0.95]  | 0.000                    |
| Perception about the quality of health care services                 |                  |                  |                    |                   |                          |
| Good/Very good                                                       | 0.89 [0.86,0.91] | 0.78 [0.75,0.80] | 0.83 [0.81,0.85]   | 0.93 [0.92,0.95]  | 0.000                    |
| Regular                                                              | 0.10 [0.08,0.13] | 0.17 [0.15,0.19] | 0.13 [0.12,0.15]   | 0.06 [0.05,0.07]  |                          |
| Bad/very bad                                                         | 0.01 [0.00,0.02] | 0.06 [0.05,0.07] | 0.04 [0.03,0.04]   | 0.01 [0.00,0.02]  |                          |
| Users who will return to the same place for healthcare               | 0.90 [0.87,0.92] | 0.82 [0.80,0.84] | 0.88 [0.86,0.89]   | 0.93 [0.92,0.95]  | 0.000                    |
| Reasons for not returning                                            |                  |                  |                    |                   |                          |
| Inconsiderate healthcare providers                                   | 0.05 [0.02,0.10] | 0.32 [0.27,0.37] | 0.25 [0.20,0.32]   | 0.09 [0.04,0.20]  | 0.000                    |
| Disagree with the diagnosis or treatment                             | 0.16 [0.10,0.25] | 0.19 [0.15,0.24] | 0.16 [0.12,0.20]   | 0.24 [0.15,0.36]  | 0.438                    |
| Lack of health improvement                                           | 0.28 [0.17,0.42] | 0.19 [0.15,0.24] | 0.17 [0.13,0.22]   | 0.32 [0.22,0.45]  | 0.033                    |
| High cost of healthcare services                                     | 0.10 [0.04,0.21] | 0.01 [0.00,0.02] | 0.01 [0.01,0.03]   | 0.20 [0.11,0.32]  | 0.000                    |
| Failure to provide or incomplete provision of prescribed medications | 0.03 [0.01,0.09] | 0.21 [0.16,0.26] | 0.21 [0.16,0.27]   | 0.002 [0.00,0.01] | 0.000                    |
| Failure to provide information about the health problem & treatment  | 0.11 [0.06,0.21] | 0.14 [0.11,0.18] | 0.09 [0.05,0.14]   | 0.04 [0.02,0.08]  | 0.037                    |
| Long waiting time                                                    | 0.02 [0.01,0.07] | 0.41 [0.35,0.47] | 0.32 [0.26,0.38]   | 0.02 [0.01,0.06]  | 0.000                    |
| Other reasons                                                        | 0.05 [0.03,0.11] | 0.11 [0.08,0.15] | 0.08 [0.06,0.12]   | 0.02 [0.01,0.06]  | 0.009                    |
| Waiting time (in minutes) Median of [IQR]**                          | 10.0 [5.00-25.0] | 30.0 [15.0,90.0] | 60.0 [15.0,120]    | 10.0 [5.00,30.0]  | 0.000                    |

\*Difference estimates performed considering the effect of the survey design.

\*\*p value estimated from quantile regression models.

Table 4 shows out-of-pocket expenditures for attending ambulatory care. DAPPs and MoH users were less likely to pay for transportation (41% and 39%) than SS and private doctors' users (58% and 51%). Also, DAPPs users spent less on transportation (MXN25.00) when compared to other users. The probability of spending on consultations (88% and 87%) and on medicines (97% and 89%) was much higher for DAPPs and private clinic users when compared to other users; the lowest probability was for users affiliated with the SS (12%). DAPPs users spent less on consultation and medicines (average cost of consultation was Mx\$30; average cost of medicines was Mx\$200) than private doctors' users (consultation Mx\$200, medicines MX\$350).

**Table 4. Out-of-pocket expenditures to attend ambulatory healthcare, Mexico 2012**

|                                                  | Transportation expenditures |                                  | Medical visit expenditures |                                  | Medicine expenditures |                                  |
|--------------------------------------------------|-----------------------------|----------------------------------|----------------------------|----------------------------------|-----------------------|----------------------------------|
|                                                  | Probability [CI]            | Median [IQR]<br>Mexican currency | Probability [CI]           | Median [IQR]<br>Mexican currency | Probability [CI]      | Median [IQR]<br>Mexican currency |
| DAPPs users                                      | 0.41 [0.37,0.44]            | 25.0 [14.0,50.0]                 | 0.88 [0.86,0.90]           | 30.0 [25.0,35.0]                 | 0.97 [0.96,0.98]      | 200 [115.0,280.0]                |
| Social Security users                            | 0.58 [0.55,0.60]            | 28.0 [15.0,50.0]                 | 0.02 [0.02,0.03]           | 60.0 [40.0,125.0]                | 0.12 [0.11,0.14]      | 300.0 [120.0,740.0]              |
| Ministry of Health users                         | 0.39 [0.37,0.42]            | 30.0 [14.0,60.0]                 | 0.11 [0.09,0.12]           | 42.0 [20.0,85.0]                 | 0.32 [0.30,0.34]      | 200 [79.0,400.0]                 |
| Private medical doctor users                     | 0.51 [0.48,0.54]            | 50.0 [20.0,100.0]                | 0.87 [0.85,0.89]           | 200.0 [100.0,350.0]              | 0.89 [0.87,0.90]      | 350.0 [200.0,600.0]              |
| <i>p value corrected by survey design effect</i> | 0.941                       | 0.000                            | 0.000                      | 0.000                            | 0.000                 | 0.000                            |

Note: Weighted estimations; p value estimated from linear regression models for the probability reported and quantile regression models in the case of the median expenditure.

## DISCUSSION

The main results show that DAPPs resulted in being an important key player in the healthcare sector. The positive effect is the wide acceptance of the public to attend these services because it facilitates access to ambulatory care. However, DAPPs poses a series of challenges to reach the objectives of the current health policies: (i) users pay out-of-pocket for medical visits and medications, counteracting financial protection policies; (ii) the high rate of prescribed medications alarms potential flaws in the quality of care in these facilities, undermining the efforts to improve quality of care; (iii) represents a conflict of interest for healthcare providers given that the medical doctors work for the pharmacies, jeopardizing both financial protection and quality of care.

The public has demonstrated a favourable response for attending DAPPs facilities despite the fact that according to the authorities, almost 98% of the population is affiliated with a public institution. [4] DAPPs enjoy popularity. Two-thirds of DAPPs users were affiliated with a public healthcare system and only one third responded that they were not affiliated with any public healthcare system. This phenomenon can have different interpretations. The rapid increase of DAPPs indicates the magnitude of the gap of the public healthcare sector to fulfil the demand in urban and metropolitan areas. DAPP users were willing to pay because these services were apparently inexpensive, conveniently located and with immediate access; also, by attending DAPPs, users avoided long waiting times, inconsiderate

1  
2  
3 healthcare providers and the incomplete provision of prescribed medicines with the  
4  
5 public healthcare sector.  
6  
7  
8  
9

10 DAPPs promote inequity and out-of-pocket expenditures because its users pay for  
11 the medications and often for the visit. This undermines the potential gains of the  
12 public policy of financial protection. Between 2003 and 2010, the public health  
13 spending aimed at people without social security protection increased 81%,  
14 whereas the percentage of total health expenditures from out-of-pocket  
15 expenditures decreased by 3%, from 52% to 49%. This means that for every  
16 percentage point increase in public spending for persons without social security,  
17 there was a reduction of 0.04% in out-of-pocket spending. [23] This suggests that  
18 despite the increase in public resources for persons without social security, this  
19 has not yet reduced out-of-pocket expenditures, which is one of the main  
20 objectives of the financial reform. Our data shows that the probability of spending  
21 on medicine was higher for DAPP users than for users of other providers. Although  
22 the amount they spent is not as large as the out-of-pocket spending of users of  
23 private physicians, for those affiliated with a public institution it means additional  
24 financial burden. This could be a wake-up call to put into practice innovative and  
25 efficient patient-centred health service models focused on providing financial  
26 protection.  
27  
28  
29  
30  
31  
32  
33  
34  
35  
36  
37  
38  
39  
40  
41  
42  
43  
44  
45  
46  
47  
48  
49  
50

51  
52 The presence of DAPPs in the health sector sends the signal that the Mexican  
53 regulation has a double standard for private doctors. Current norms forbid direct  
54 communication between pharmacies and doctors' offices. [24] The results points  
55  
56  
57  
58  
59  
60

1  
2  
3 out that the regulation is imprecise and there is weakness of the health authority to  
4 enforce it. This situation could be interpreted as an unspoken public policy of  
5  
6 laissez faire to deal with the dilemma of favouring access to healthcare vs.  
7  
8 reinforcing the observance of the regulations.  
9  
10  
11  
12

13  
14  
15 Despite the fact that ENSANUT 2012 did not gather in-depth quality of care  
16 information, the results show that DAPPs users were prescribed an excessive  
17 number of medicines. Almost two thirds of users received, on average, three or  
18 more medications, despite the fact that most were young and sought ambulatory  
19 care for acute health problems, mainly mild acute respiratory illnesses (ARI).  
20 Globally, most incidences of inappropriate use of antibiotics occur in ARI. Given  
21 the large number of medicines prescribed in DAPPs consultations, it is likely that  
22 this may be derived from over-prescription of antibiotics. This requires in-depth  
23 analyses.  
24  
25  
26  
27  
28  
29  
30  
31  
32  
33  
34  
35  
36  
37  
38

39 DAPPs represent a conflict of interest because the pharmacies hire the medical  
40 doctors to run the pharmacy-owned examining rooms and link the processes of  
41 prescription and sale of medications. According to Brody, "*conflicts of interest,*  
42 *whether individual or organizational, occur when one enters into arrangements that*  
43 *reasonably tempt one to put aside one's primary obligations (patients' safety) in*  
44 *favor of secondary interests, such as financial self-interest*". [25] The staff of  
45 DAPPs is being paid a salary plus commissions derived from the prescriptions. [26]  
46  
47  
48  
49  
50  
51  
52  
53  
54  
55  
56  
57  
58  
59  
60

1  
2  
3 dispensing [13, 27] or exposure to information from pharmaceutical companies [28]  
4  
5 affected prescription choices, prompting physicians to not necessarily act in the  
6  
7 best interest of patients, resulting in higher prescribing frequency, higher costs, and  
8  
9 lower prescribing quality. The high number of prescribed medications indicates that  
10  
11 medical doctors working for DAPPs may have financial incentives to prescribe  
12  
13 certain products. The problem of overprescribing results in poly-pharmacy,  
14  
15 increased out-of-pocket expenditures, increased risk of adverse medication  
16  
17 reactions and, in the case of antibiotics, resistance. This complex situation  
18  
19 jeopardizes the objectives of the policy to sell antibiotics only with a medical  
20  
21 prescription.  
22  
23  
24  
25  
26  
27  
28

29 The growing presence of DAPPs contributes to distort the market in the Mexican  
30  
31 context. The main health policies are focused on promoting the demand-side of the  
32  
33 services that the public sector provides; little attention is being paid to developing  
34  
35 policies aimed at regulating and taking advantage of the role of the private market  
36  
37 to enhance competition and improve the quality of healthcare. Patients are usually  
38  
39 poorly informed consumers who fail to recognize high quality service; for example,  
40  
41 in the present study, the interviewees attended DAPPs because it seemed to be  
42  
43 convenient, rather than for the high quality of care offered. Apparently, the public  
44  
45 sector has an unrecognized conflict between reinforcing the regulation, promoting  
46  
47 high quality care and proper use of medications vs. allowing the growing supply of  
48  
49 this type of ambulatory care providers to absorb the spill-over of the demand for  
50  
51 consultations and medicines, regardless of the quality and cost. The findings  
52  
53 support the assumption that is necessary to strengthen the stewardship of the MoH  
54  
55  
56  
57  
58  
59  
60

1  
2  
3 in the private sector, along with the urgent need to consolidate a national  
4  
5 pharmaceutical policy.  
6  
7

8  
9  
10 The study has several limitations. It is a secondary data analysis of a cross-  
11  
12 sectional study; thus, no longitudinal data are available to ascertain the changes of  
13  
14 DAPPs services over time. Also, the available information did not allow in-depth  
15  
16 evaluation of the quality of prescriptions. The information was gathered through  
17  
18 interviews during home visits; therefore, the quality of the data depends on user  
19  
20 recall. To mitigate this potential bias, the questions only addressed the prior 15-day  
21  
22 period. Further and detailed information about the contracts and remunerations of  
23  
24 DAPPs physicians is necessary in order to better evaluate the magnitude of the  
25  
26 conflict of interest.  
27  
28  
29  
30  
31  
32

### 33 34 **CONCLUSION**

35  
36 DAPPs have become an important player in Mexican healthcare, but they are an  
37  
38 “elephant in the room.” The fact that more than half of DAPPs users were enrolled  
39  
40 in a public health insurance program suggests dissatisfaction with these services.  
41  
42 DAPPs users reported high satisfaction with the health services provided.  
43  
44 However, the operation of DAPPs raise questions about its impact on 1) out-of-  
45  
46 pocket spending at the expense of the financial protection policies in health  
47  
48 established in Mexico, and 2) the quality of care, which could arise from the conflict  
49  
50 of interest implicit in the linkage of prescribing and dispensing processes. It is  
51  
52 necessary to monitor the quality of care provided by DAPPs and strengthen its  
53  
54 regulation and relationship with the remainder of the health sector.  
55  
56  
57  
58  
59  
60



## CONTRIBUTORS

1  
2  
3  
4  
5  
6  
7  
8  
9  
10  
11  
12  
13  
14  
15  
16  
17  
18  
19  
20  
21  
22  
23  
24  
25  
26  
27  
28  
29  
30  
31  
32  
33  
34  
35  
36  
37  
38  
39  
40  
41  
42  
43  
44  
45  
46  
47  
48  
49  
50  
51  
52  
53  
54  
55  
56  
57  
58  
59  
60

RPC, MHA, SVD, VJW, AD conceptualized the study. SVD, AD conducted the literature review. ESM, VJW, SVD, RPC, MHA designed the study. ESM analysed the data. RPC, SVD, VJW, ESM, AD, MHA interpreted the data, wrote the manuscript and approved the final draft.

## FUNDING

This research received no specific grant from any funding agency in the public, commercial or not-for-profit sectors.

## COMPETING INTERESTS

There is no financial interest to disclose.

## ETHICS STATEMENT

This study is a secondary data analysis of the ENSANUT 2012. The data for the analysis were requested and obtained from the surveys public repository hosted at the National Institute of Public Health webpage at: <http://ensanut.insp.mx/>. This repository has the data already de-identified; thus it is not possible to trace any of the data to the actual individual. In accordance to the Internal Regulation of the Research Ethics Committee of the National Institute of Public Health, this secondary analysis was considered exempt of approval.

## REFERENCES

1. Organisation for Economic Co-operation and Development. OECD Health Data 2013: How Does Mexico Compare. Organisation for Economic Co-operation and Development, 2013. <http://www.oecd.org/mexico/Briefing-Note-MEXICO-2013.pdf>.
2. Organisation for Economic Co-operation and Development. An Overview of Growing Income Inequalities in OECD Countries: Main Findings. Organisation for Economic Co-operation and Development , 2011. <http://www.oecd.org/els/soc/49499779.pdf>.
3. Wirtz VJ, Reich MR, Leyva-Flores R, et al. Medicines in Mexico, 1990-2004: systematic review of research on access and use. *Salud Publica Mex* 2008;**50**:S470-S479.
4. Knaul FM, González-Pier E, Gómez-Dantés O, et. al. The quest for universal health coverage: achieving social protection for all in Mexico. *Lancet* 2012; **380**:1259-1279.
5. Fundación Mexicana para la Salud: Trabajando por la salud de la población. Propuestas de política para el sector farmacéutico. Versión para el diálogo. FUNSALUD, A.C., 2011. [http://www.funsalud.org.mx/eventos\\_2011/trabajando%20por%20la%20salud/Doc%20PolPublSFarm%20vFDigital%20060511.pdf](http://www.funsalud.org.mx/eventos_2011/trabajando%20por%20la%20salud/Doc%20PolPublSFarm%20vFDigital%20060511.pdf).
6. Dreser A, Vázquez-Vélez E, Treviño S, et al. Regulation of antibiotic sales in Mexico: an analysis of printed media coverage and stakeholder

1  
2  
3 participation. BMC Public Health 2012 Dec;12 (1051).

4  
5 <http://www.biomedcentral.com/1471-2458/12/1051> (accessed 6 March  
6  
7  
8 2013).

- 9  
10  
11 7. Rodwin M, Okamoto A. Physicians' conflicts of interest in Japan and the  
12  
13 United States: lessons for the United States. J Health Polit Policy Law  
14  
15 2000; **25**: 343–375.  
16  
17  
18 8. Kwon S. Pharmaceutical reform and physician strikes in Korea: separation  
19  
20 of drug prescribing and dispensing. Soc Sci Med 2003;**57**: 529-538.  
21  
22  
23 9. Liu X, Mills A. The influence of bonus payments to doctors on hospital  
24  
25 revenue: results of a quasi-experimental study. Appl Health Econ Health  
26  
27 Policy 2003;**2**:91-98.  
28  
29  
30 10. Sun Q, Santoro MA, Meng Q, et al. Pharmaceutical policy in China. Health  
31  
32 Aff (Millwood) 2008;**27**:1042-1050.  
33  
34  
35 11. Trap B, Hansen EH, Hogerzeil H. Prescription habits of dispensing and  
36  
37 non-dispensing doctors in Zimbabwe. Health Policy Plan 2002; **17**: 288–  
38  
39 295.  
40  
41  
42 12. Park S, Soumerai SB, Adams AS, et al. Antibiotic use following a Korean  
43  
44 national policy to prohibit medication dispensing by physicians. Health  
45  
46 Policy Plan 2005;**20**: 302-309.  
47  
48  
49 13. Chou YJ, Yip WC, Lee CH, et al. Impact of separating drug prescribing and  
50  
51 dispensing on provider behaviour: Taiwan (China)'s experience. Health  
52  
53 Policy Planning 2003;**18**: 316-329.  
54  
55  
56  
57  
58  
59  
60

- 1  
2  
3 14. Romero-Martínez M, Shamah-Levy T, Franco-Núñez A, Villalpando S,  
4 Cuevas-Nasu L, et al. National Health and Nutrition Survey 2012: design  
5 and coverage. Salud Publica Mex 2013; **55**:S332-S340.  
6  
7  
8  
9  
10 15. Brown C, Pagán J, Rodríguez-Oreggia E. The decision-making process of  
11 health-care utilization in Mexico. Health Policy 2005;**72**: 81-91.  
12  
13 16. López-Ceballos D, Chi C. Health-care utilization in Ecuador: a multilevel  
14 analysis of socio-economic determinants and inequality issues. Health  
15 Policy Plan 2010; **25**: 209-218.  
16  
17 17. Valdivia M. Public health infrastructure and equity in the utilization of  
18 outpatient health-care services in Peru. Health Policy Plan 2002;**17**: 12-19.  
19  
20 18. Comisión Nacional para el Desarrollo de los Pueblos Indígenas (CDI). Los  
21 hogares y la población indígena.  
22 [http://www.cdi.gob.mx/index.php?id=211&option=com\\_content&task=view](http://www.cdi.gob.mx/index.php?id=211&option=com_content&task=view),  
23 2009 (accessed 6 March 2013).  
24  
25 19. Consejo Nacional de Población (CONAPO). Índice de marginación por  
26 localidad. <http://www.conapo.gob.mx/es/CONAPO> (accessed 2 March  
27 2013).  
28  
29 20. Kolenikov S, Angeles G. The use of discrete data in PCA: theory,  
30 simulations, and applications to socioeconomic indices. Chapel Hill:  
31 Carolina Population Center, University of North Carolina, 2004.  
32  
33 21. McKenzie DJ. Measuring inequality with asset indicators. J Popul Econ  
34 2005; 2(229).  
35  
36 <http://siteresources.worldbank.org/DEC/Resources/finaljpopmckenzie1.pdf>.  
37  
38 (accessed 2 February 2013).  
39  
40  
41  
42  
43  
44  
45  
46  
47  
48  
49  
50  
51  
52  
53  
54  
55  
56  
57  
58  
59  
60

- 1  
2  
3 22. Hosmer D, Lemeshow S. Applied Logistic Regression. Second Ed.,  
4  
5 Canada: Wiley Series in Probability and Statistics, 2000.  
6  
7  
8 23. Muñoz O, Rodríguez-Ortega E, Pérez-Cuevas R, et al. Propuesta de un  
9  
10 Sistema Nacional de Servicios de Salud: componente de salud de una  
11  
12 propuesta de seguridad social universal. Documento elaborado por el  
13  
14 Centro de Estudios Económicos y Sociales en Salud (CEESES) del  
15  
16 Hospital Infantil de México Federico Gómez (HIMFG) para el Consejo  
17  
18 Nacional de Evaluación de la Política de Desarrollo Social (CONEVAL).  
19  
20 México: UNAM, Seminario sobre Medicina y Salud, 2012.  
21  
22  
23  
24 24. Farmacopea de los Estados Unidos Mexicanos. Suplemento para  
25  
26 establecimientos dedicados a la venta y suministro de medicamentos y  
27  
28 otros insumos para la salud. México: Secretaría de Salud, 2010.  
29  
30  
31 25. Brody H. Professional medical organizations and commercial conflicts of  
32  
33 interest: ethical issues. *Ann Fam Med* 2010;**8**:354-358.  
34  
35  
36 26. Leyva-Piña MA, Pichardo-Palacios S. Los médicos de las Farmacias  
37  
38 Similares: ¿Degradación de la profesión médica? *Polis* 2012;**8**:143-175.  
39  
40  
41 27. Iizuka T. Experts' agency problems: evidence from the prescription drug  
42  
43 market in Japan. *Rand J Econ* 2007;**38**:844-862.  
44  
45  
46 28. Spurling GK, Mansfield PR, Montgomery BD, et al. Information from  
47  
48 pharmaceutical companies and the quality, quantity, and cost of physicians'  
49  
50 prescribing: a systematic review. *PLoS Med* 2010 Oct;7 (10): e1000352.  
51  
52 <http://www.plosmedicine.org/article/info%3Adoi%2F10.1371%2Fjournal.pmed.1000352>  
53  
54 <http://www.plosmedicine.org/article/info%3Adoi%2F10.1371%2Fjournal.pmed.1000352>  
55  
56 (accessed 15 January 2013).  
57  
58  
59  
60

1  
2  
3  
4  
5  
6  
7  
8  
9  
10  
11  
12  
13  
14  
15  
16  
17  
18  
19  
20  
21  
22  
23  
24  
25  
26  
27  
28  
29  
30  
31  
32  
33  
34  
35  
36  
37  
38  
39  
40  
41  
42  
43  
44  
45  
46  
47  
48  
49  
50  
51  
52  
53  
54  
55  
56  
57  
58  
59  
60

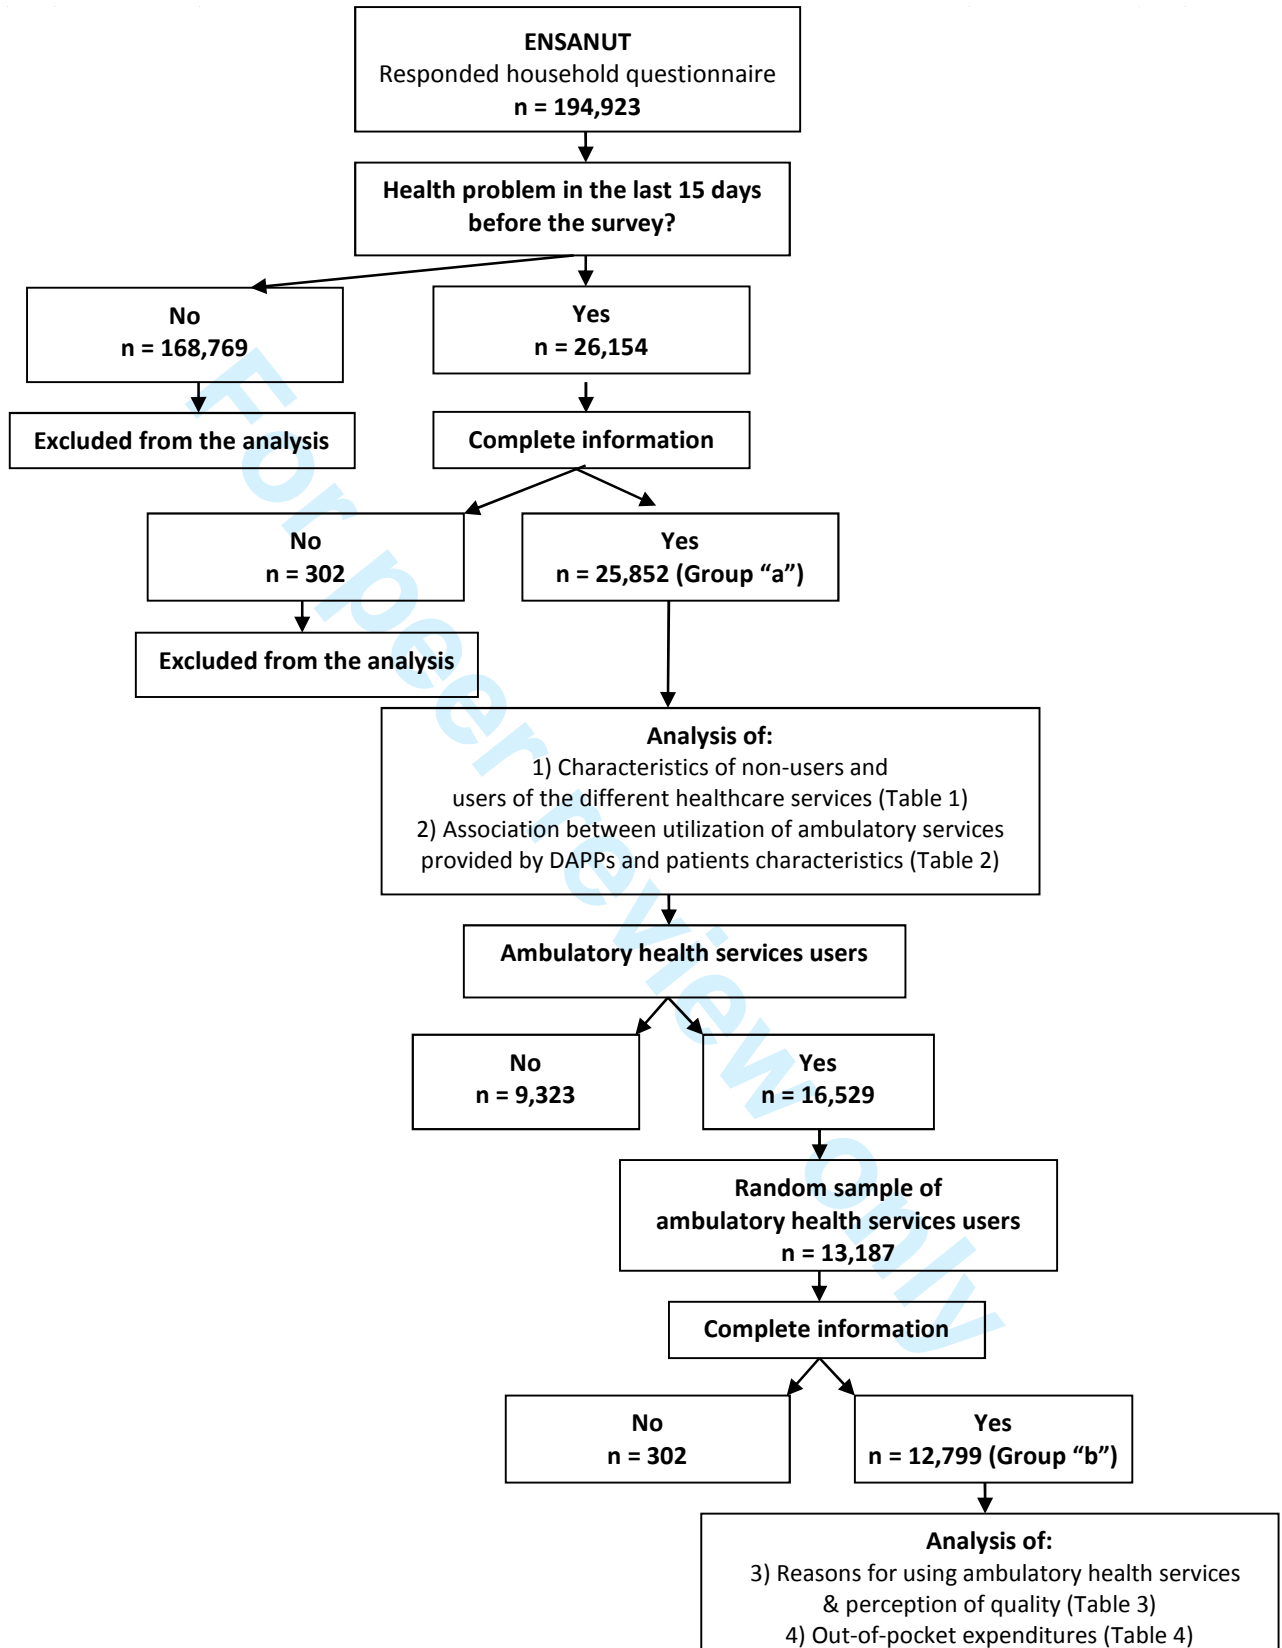

# BMJ Open

## EFFECTS OF THE EXPANSION OF DOCTORS' OFFICES ADJACENT TO PRIVATE PHARMACIES IN MEXICO: SECONDARY DATA ANALYSIS OF A NATIONAL SURVEY

|                                 |                                                                                                                                                                                                                                                                                                                                                                                                                                                                                                                                                                                                                                                                    |
|---------------------------------|--------------------------------------------------------------------------------------------------------------------------------------------------------------------------------------------------------------------------------------------------------------------------------------------------------------------------------------------------------------------------------------------------------------------------------------------------------------------------------------------------------------------------------------------------------------------------------------------------------------------------------------------------------------------|
| Journal:                        | <i>BMJ Open</i>                                                                                                                                                                                                                                                                                                                                                                                                                                                                                                                                                                                                                                                    |
| Manuscript ID:                  | bmjopen-2013-004669.R1                                                                                                                                                                                                                                                                                                                                                                                                                                                                                                                                                                                                                                             |
| Article Type:                   | Research                                                                                                                                                                                                                                                                                                                                                                                                                                                                                                                                                                                                                                                           |
| Date Submitted by the Author:   | 17-Apr-2014                                                                                                                                                                                                                                                                                                                                                                                                                                                                                                                                                                                                                                                        |
| Complete List of Authors:       | Pérez-Cuevas, Ricardo; Inter-American Development Bank, Division of Social Protection and Health<br>Doubova, Svetlana; Mexican Institute of Social Security, Epidemiology and Health Services Research Unit, CMN Siglo XXI<br>Wirtz, Veronika; Boston University, Center for Global Health and Development ; National Institute of Public Health, Centre for Health Systems Research<br>Serván-Mori, Edson; National Institute of Public Health, Centre for Health Systems Research<br>Dreser, Anahí; National Institute of Public Health, Center for Health Systems Research<br>Hernández-Ávila, Mauricio; National Institute of Public Health, General Direction |
| <b>Primary Subject Heading</b>: | Health services research                                                                                                                                                                                                                                                                                                                                                                                                                                                                                                                                                                                                                                           |
| Secondary Subject Heading:      | Health policy                                                                                                                                                                                                                                                                                                                                                                                                                                                                                                                                                                                                                                                      |
| Keywords:                       | Quality in health care < HEALTH SERVICES ADMINISTRATION & MANAGEMENT, Organisation of health services < HEALTH SERVICES ADMINISTRATION & MANAGEMENT, PRIMARY CARE                                                                                                                                                                                                                                                                                                                                                                                                                                                                                                  |
|                                 |                                                                                                                                                                                                                                                                                                                                                                                                                                                                                                                                                                                                                                                                    |

SCHOLARONE™  
Manuscripts

1  
2  
3  
4  
5  
6  
7  
8  
9  
10  
11  
12  
13  
14  
15  
16  
17  
18  
19  
20  
21  
22  
23  
24  
25  
26  
27  
28  
29  
30  
31  
32  
33  
34  
35  
36  
37  
38  
39  
40  
41  
42  
43  
44  
45  
46  
47  
48  
49  
50  
51  
52  
53  
54  
55  
56  
57  
58  
59  
60

# EFFECTS OF THE EXPANSION OF DOCTORS' OFFICES ADJACENT TO PRIVATE PHARMACIES IN MEXICO: SECONDARY DATA ANALYSIS OF A NATIONAL SURVEY

**Corresponding author:** \*Anahí Dreser. Instituto Nacional de Salud Pública.

Avenida Universidad 655, Cuernavaca, Morelos 62100, México. Email:

[anahi.dreser@insp.mx](mailto:anahi.dreser@insp.mx). Telephone +52 (777) 329-3000 ext. 5309.

**Authors:** Ricardo Pérez-Cuevas <sup>(1)</sup>, Svetlana V. Doubova <sup>(2)</sup>, Veronika J. Wirtz <sup>(3,4)</sup>, Edson Serván-Mori <sup>(4)</sup> Anahí Dreser <sup>(4)</sup>\*, Mauricio Hernández-Ávila <sup>(5)</sup>

(1) Division of Social Protection and Health, Inter-American Development Bank, Mexico, D.F., Mexico

(2) Epidemiology and Health Services Research Unit, CMN Siglo XXI, Mexican Institute of Social Security, Mexico, D.F., Mexico

(3) Center for Global Health and Development (CGHD), Boston University, Boston, MA

(4) Centre for Health Systems Research, National Institute of Public Health, Cuernavaca, Mexico.

(5) General Director, National Institute of Public Health, Cuernavaca, Mexico.

**Running title:** Doctors' offices adjacent to private pharmacies in Mexico

**Keywords:** *Community pharmacy, Physician prescribing patterns, Conflict of interest, Health expenditures, Mexico.*

**Word count:** 3, 826



## ABSTRACT

**Objectives:** To compare the sociodemographic characteristics, reasons for attending, perception of quality, and associated out-of-pocket (OOP) expenditures of doctors' offices adjacent to private pharmacies (DAPPs) users with users of Social Security (SS), Ministry of Health (MoH), private doctor's offices independent from pharmacies, and non-users.

**Setting:** Secondary data analysis of the 2012 National Survey of Health and Nutrition of Mexico.

**Participants:** The study population comprised 25,852 individuals identified as having had a health problem 15 days before the survey, and a random sample of 12,799 ambulatory health services users.

**Outcome measures:** Sociodemographic characteristics, reasons for attending healthcare services, perception of quality and associated OOP expenditures.

**Results:** The distribution of users was as follows: DAPPs (9.2%), SS (16.1%), MoH (20.9%), private providers (15.4%), and nonusers (38.5%); 65% of DAPPs users were affiliated with a public institution (MoH 35%, SS 30%) and 35% reported not having health coverage. DAPPs users considered the services inexpensive, convenient, and with a short waiting time, yet they received  $\geq 3$  medications more often (67.2%, 95% Confidence intervals (CI): 64.2-70.1) than users of private doctors (55.7%, 95%CI: 52.5-58.6) and public institutions (SS 53.8%, 95%CI: 51.6-55.9); MoH 44.7%, 95%CI: 42.5-47.0). The probability of spending on consultations (88%, 95%CI: 86-89) and on medicines (97%, 95%CI: 96-98) was much higher for DAPPs users when compared to SS (2%, 95%CI: 2-3

1  
2  
3 and 12%, 95%CI: 11-14, respectively) and MoH users (11%, 95%CI: 9-12 and  
4  
5 32%, 95%CI:30-34, respectively).  
6  
7

8 **Conclusions:** DAPPs counteract current financial protection policies since a  
9  
10 significant percentage of its users were affiliated with a public institution, reported  
11  
12 higher OOP spending and higher number of medicines prescribed than users of  
13  
14 other providers. The overprescription should prompt studies to learn about DAPPs'  
15  
16 quality of care, which may arise from the conflict of interest implicit in the linkage of  
17  
18 prescribing and dispensing processes.  
19  
20  
21  
22  
23  
24  
25  
26  
27  
28  
29  
30  
31  
32  
33  
34  
35  
36  
37  
38  
39  
40  
41  
42  
43  
44  
45  
46  
47  
48  
49  
50  
51  
52  
53  
54  
55  
56  
57  
58  
59  
60

## STRENGTHS AND LIMITATIONS OF THIS STUDY

- This study is the first that uses nationally representative household data to analyze the characteristics of users of doctors' offices adjacent to private pharmacies (DAPPs), their reasons to attend, perception of quality, and associated out-of-pocket expenditures, and runs a comparative analysis with users of other healthcare services.
- This study identified that users of DAPPs: paid out-of-pocket for medical visits and medications, therefore counteracting financial protection policies, and received, on average, higher number of medicines prescribed than users of other healthcare institutions, thus signaling poorer quality of care; For DAPPs medical doctors this situation might reflect a conflict of interest given that they work for the pharmacies.
- The main limitation is that this study is a secondary data analysis, thus with the available information it was not possible to evaluate in-depth the quality of care.

## BACKGROUND

In the past decade in Mexico, recognition of inequity in health, disparities in access and utilization of health services, and differences in resource allocation and health expenditures fuelled the implementation of the System for Social Protection of Health (SSPH). The SSPH aims at achieving universal healthcare coverage and financial protection for the population without Social Security. However, in 2010—8 years after its inception—the Mexican total health expenditure accounted for only 6.2% of the gross domestic product [1] from which more than half (51.7%) is financed through out-of-pocket expenditures. Among OECD countries, Mexico's income inequality is the highest. [2]

The complexity of the Mexican healthcare system challenges the success of health policies because the healthcare sector comprises segmented public and private healthcare systems with little interaction. The public sector covers an estimated 78.6% of Mexico's population (~112 million). All formal labour market and government employees receive healthcare from the Social Security institutions (SS), whereas most of the unemployed or self-employed population receives healthcare from the Ministry of Health (MoH), which comprises each of the 32 decentralized MoH facilities in every Mexican state. The private sector provides care for the uninsured population and for up to 31% of those insured who choose to use this system for ambulatory care.

Reaching universal coverage is expected to improve access and protect the population from the financial burden of healthcare. To accomplish these endeavours, the SSPH, which is a non-contributory social health insurance

1  
2  
3 program, includes access to ambulatory and hospital healthcare in public  
4 institutions and provision of no-cost prescribed medications at the point of care.  
5  
6 This represents actual financial protection, particularly for low-income groups. [3]  
7  
8 SSPH was launched in 2002. By 2011, the program reached 52.6 million affiliates  
9  
10 and the benefit package increased from 91 to 284 interventions. This package  
11  
12 covers the treatment of ~95% of the causes of visits in primary care clinics and  
13  
14 admissions to general hospitals [4]. During the same period, the proportion of  
15  
16 patients reporting complete provision of medications at the MoH facilities increased  
17  
18 from 55% to 62%, whereas in the SS the increase was from 70% to 87%. [4]  
19  
20

21  
22 Despite the progress, Mexican policies on access to healthcare and, in particular,  
23  
24 to medications still stand at a crossroad and deserve careful analysis. The  
25  
26 availability of medicines is a key determinant of access to and utilization of health  
27  
28 services. In Mexico, most medications are being paid for with private resources  
29  
30 (mostly out-of-pocket) despite the important public investment in healthcare. A  
31  
32 recent report has emphasized that for every Mx\$100 spent on medications, Mx\$79  
33  
34 is being paid with private resources and only Mx\$21 with public funds. [5]  
35  
36 Furthermore, in 2010 the Mexican authorities enacted a prescription-only  
37  
38 requirement policy to enforce the regulation to sell antibiotics only with a  
39  
40 physician's prescription. This policy, aimed at mitigating self-medication, had the  
41  
42 unintended consequence of boosting private ambulatory healthcare in the form of  
43  
44 doctor's offices adjacent to private pharmacies (DAPPs). [6]  
45  
46  
47  
48  
49  
50  
51

52  
53 Indeed, since a decade ago, a small number of DAPPs began to operate in some  
54  
55 low-cost pharmacy chains but soon after the publication of the antibiotics' policy, a  
56  
57 growing number of DAPPs have been observed nationwide. Currently, there are  
58  
59  
60

1  
2  
3 10,000 DAPPs in the country that provide 250,000 medical visits every day. [7]  
4  
5 This emergent phenomenon questions the success of current health policies  
6  
7 focused on universal coverage for healthcare and signals the unbalance of the  
8  
9 supply and demand for ambulatory healthcare and medicines in the public sector.  
10  
11 Furthermore, DAPPs challenges current regulations and norms for doctors' offices  
12  
13 and private pharmacies.  
14  
15

16  
17 The policies to improve access to medicines and safe prescriptions face multiple  
18  
19 challenges such as the conflict of interest and may have unanticipated results. Until  
20  
21 recently, in Japan and United States, [8] Korea [9] and China [10, 11] among other  
22  
23 countries, [12] medical doctors and pharmacists were allowed to prescribe and  
24  
25 dispense medicines. Such practices contributed to high medicine utilization; for  
26  
27 example, in China almost 50% of the revenues of medical doctors and pharmacists  
28  
29 came from pharmaceuticals. [10] Due to the financial incentive, more medicines  
30  
31 were dispensed and their selection was influenced by factors other than their  
32  
33 quality or cost-effectiveness. The recognition of this problem encouraged the  
34  
35 introduction of reforms aimed at separating medicine prescribing and dispensing.  
36  
37 In some countries this strategy decreased the irrational use of medicines [13]  
38  
39 although in other countries it provoked the practice that health providers hired  
40  
41 onsite pharmacists. [14] Because the provider paid a salary to the pharmacists, the  
42  
43 provider's incentives and irrational prescription patterns remained unchanged.  
44  
45  
46  
47  
48  
49

50 In Mexico, expansion of DAPPs indicates that prescribing and dispensing of  
51  
52 medicines are related instead of being separated as the international experience  
53  
54 suggests. To better understand this situation, the objectives of this study were to  
55  
56 compare DAPPs users with users of other services in terms of their characteristics,  
57  
58  
59  
60

1  
2  
3 reasons for attending specific services, perception of quality, and associated out-  
4  
5 of-pocket expenditures.  
6

## 7 8 **METHODS**

### 9 10 **Data source**

11  
12 This study is a secondary data analysis of the 2012 National Survey of Health and  
13 Nutrition (ENSANUT 2012). [15] ENSANUT is a complex survey, which is  
14  
15 representative at the national, state and urban-rural stratum levels. It was designed  
16  
17 to collect data on different health and nutrition conditions and the utilization of  
18  
19 ambulatory and hospital care services. ENSANUT 2012 was applied to 194,923  
20  
21 individuals in 50,528 households (response rate of 87%). It was sampled through a  
22  
23 probabilistic multistage process. The specific details on the sampling approach of  
24  
25 ENSANUT 2012 are published elsewhere. [15]  
26  
27

28  
29 To collect the information for the ENSANUT survey, previously trained interviewers  
30  
31 carried out direct, structured face-to-face interviews with key household informants  
32  
33 and health services users. The interviewers applied the 5-questionnaire set that  
34  
35 ENSANUT 2000 and 2006 used: household, health services use, children,  
36  
37 adolescents and adults  
38  
39

### 40 41 42 **Study population, variables and statistical analysis**

43  
44 The present study analyzed the information from the household and health  
45  
46 services use questionnaires of ENSANUT 2012. Figure 1 depicts selection of the  
47  
48 study population.  
49  
50

51  
52 **[Figure 1. Selection of study population goes here]**  
53  
54  
55  
56  
57  
58  
59  
60

1  
2  
3 The study population comprised: a) individuals identified as having had a health  
4 problem within 15 days before the survey according to the household questionnaire  
5 and b) a random sample of ambulatory health services users who answered the  
6 health services use questionnaire [14]. The number of individuals who had a health  
7 problem was obtained as follows: from the total number of survey participants  
8 (194,923 individuals), 26,154 (13.4%) reported having a health problem; after  
9 excluding the questionnaires with incomplete information, the final sample was  
10 25,852 individuals. Thus, the non-response rate was 1.2%. Following the same  
11 logic, 13,187 health services users were chosen; 12,799 had complete information  
12 and 388 (2.9%) did not.

13  
14  
15 In group “a” we identified five categories of users of healthcare services: 1) doctors’  
16 offices adjacent to private pharmacies (DAPPs), 2) SS facilities, 3) MoH facilities,  
17 4) offices of private doctors independent from pharmacies, and 5) non-users or  
18 those who reported consulting with a friend, neighbour, family member,  
19 homeopaths or other healers. This was the dependent variable.

20  
21  
22 Data analysis was performed in two stages. In the first stage, the sample “a”  
23 served to describe the sociodemographic characteristics and identify the factors  
24 associated with the use of DAPPs in comparison to the use of other health services  
25 or no use. The analysis included the following independent variables that the  
26 literature suggests as related to the use of health services: [16-18] sex (male or  
27 female), age group (0-9 years, 10-19 years, 20-64 years and  $\geq 65$  years), and years  
28 of schooling (0, 1-6, 7-9, and  $\geq 10$ ). The variable of years of schooling was obtained  
29 directly from the interview data for subjects 15 years of age and older, and for  
30 individuals younger than 15 years the mean of years of schooling of the household



1  
2  
3 members was used. Other analyzed variables were place of residence (rural,  
4 urban or metropolitan); ethnicity of the head of household; [19] degree of  
5 marginalization (very low/low, middle, high/very high) following the 2010  
6 marginalization index (based on access to basic infrastructure services, housing  
7 conditions, education attainment, and wage earnings) at locality level [20]; type of  
8 medical insurance (SS, SSPH, private or none); and socioeconomic status (SES).  
9 The SES was determined classifying the population in quintiles; the information to  
10 ascertain the SES included possession of different assets, services and  
11 characteristics of the household infrastructure. [21, 22] The SES index was  
12 constructed using a principal components analysis with polychoric correlation  
13 matrices. Additionally, type of health problem (acute, chronic or other) and  
14 perception of severity (mild or moderate/severe) of health problem were analyzed.  
15 The factors associated with the use of a specific healthcare provider were modeled  
16 using a multinomial logistic regression [23] in which the dependent variable  
17 included the five categories of health services users described before. The non-  
18 users, which represented 38.5% of the sample, were used as the reference  
19 category. In addition to the sociodemographic characteristics, the model was  
20 adjusted for the geographic region of state of residence (Northwest, Northeast,  
21 Central-North, East, West, Central-South, Southwest, Southeast). The results were  
22 reported in odds ratios (OR). The hypothesis tests on the OR estimated were  
23 performed at 1, 5 and 10% confidence levels. We report various statistical  
24 goodness of fit and reliability of the estimated models [Akaike criteria (AIC), log-  
25 likelihood,  $LR-\chi^2$ , and  $R^2$ -McFadden].  
26  
27  
28  
29  
30  
31  
32  
33  
34  
35  
36  
37  
38  
39  
40  
41  
42  
43  
44  
45  
46  
47  
48  
49  
50  
51  
52  
53  
54  
55  
56  
57  
58  
59  
60

1  
2  
3 The second stage of the analysis focused on sample “b” of health services users.  
4  
5 Participants in this part of the survey were asked about the characteristics of the  
6  
7 healthcare received and their perceptions of the quality of care. The descriptive  
8  
9 analysis comprised the main reasons for using specific healthcare services, the  
10  
11 percentage of users who received information about their diagnosis, number of  
12  
13 prescribed medicines (0, 1, 2, or 3 or more), percentage of users who received and  
14  
15 understood the information about prescribed medicines, perception regarding the  
16  
17 quality of care received, willingness to return to the same healthcare institution in  
18  
19 the future, and reasons for dissatisfaction with health care (e.g., lack of  
20  
21 improvement in health, high costs, remote services, long waiting time). We also  
22  
23 analyzed out-of-pocket expenditures for transportation from home to healthcare  
24  
25 facilities, healthcare visits and medicines. The amount was reported in local  
26  
27 currency (Mexican pesos). To estimate the median and interquartile range (IQR) of  
28  
29 waiting time and out-of-pocket expenditures by type of health care provider, the  
30  
31 quantile regression model at the population level was utilized. All statistical  
32  
33 analyses were performed using the statistical package STATA 12.1.  
34  
35  
36  
37  
38  
39  
40  
41  
42

## 43 RESULTS

44  
45 Table 1 summarizes the characteristics of users of different healthcare services.  
46  
47 Overall, 61.5% of participants who were reported to have had a health problem  
48  
49 seek care with a health provider according to the following distribution: MoH  
50  
51 (20.9%), SS (16.1%), private providers (15.4%) and DAPPs (9.2%).  
52  
53  
54  
55  
56  
57  
58  
59  
60

Table 1. Characteristics of users and non-users of the different healthcare services, Mexico 2012\*

|                                             | DAPPs                      | Social Security  | Ministry of Health | Private doctors  | Non-users        |                                                          |
|---------------------------------------------|----------------------------|------------------|--------------------|------------------|------------------|----------------------------------------------------------|
| Observations                                |                            |                  |                    |                  |                  |                                                          |
| Sample                                      | 2,387                      | 4,148            | 5,390              | 3,976            | 9,951            | <i>p-value corrected<br/>by survey design<br/>effect</i> |
| %                                           | 9.2                        | 16.1             | 20.9               | 15.4             | 38.5             |                                                          |
| Weighted                                    | 1,715,838                  | 2,775,195        | 2,709,387          | 2,884,34         | 5,967,254        |                                                          |
| %                                           | 10.7                       | 17.3             | 16.9               | 18.0             | 37.2             |                                                          |
|                                             | <i>Estimation [95% CI]</i> |                  |                    |                  |                  |                                                          |
| Male (vs. female)                           | 44.7 [42.0,47.5]           | 41.0 [39.0,43.0] | 40.3 [38.6,42.2]   | 45.0 [42.8,47.2] | 46.4 [45.1,47.7] | 0.00                                                     |
| Years of age                                |                            |                  |                    |                  |                  |                                                          |
| 0-9                                         | 35.3 [32.3,38.4]           | 18.2 [16.5,20.1] | 29.1 [27.3,31.0]   | 30.6 [28.6,32.7] | 19.6 [18.5,20.8] | 0.00                                                     |
| 10-19                                       | 16.5 [14.5,18.7]           | 9.2 [8.1,10.5]   | 13.7 [12.5,15.0]   | 11.9 [10.7,13.2] | 16.4 [15.5,17.4] |                                                          |
| 20-64                                       | 43.5 [40.6,46.5]           | 56.4 [54.2,58.7] | 46.8 [45.0,48.6]   | 48.0 [45.9,50.1] | 56.0 [54.6,57.4] |                                                          |
| ≥65                                         | 4.8 [3.6,6.2]              | 16.1 [14.4,17.9] | 10.4 [9.3,11.7]    | 9.5 [8.4,10.7]   | 8.0 [7.2,8.8]    |                                                          |
| Years of schooling                          |                            |                  |                    |                  |                  |                                                          |
| 0                                           | 3.8 [2.9,4.9]              | 7.1 [6.1,8.3]    | 11.1 [10.0,12.4]   | 6.5 [5.6,7.5]    | 8.1 [7.4,8.9]    | 0.00                                                     |
| 1-6                                         | 46.2 [43.0,49.4]           | 36.9 [34.5,39.4] | 54.1 [52.0,56.3]   | 36.3 [34.0,38.7] | 42.7 [41.0,44.4] |                                                          |
| 7-9                                         | 28.8 [26.1,31.7]           | 25.6 [23.5,27.8] | 22.0 [20.2,23.8]   | 25.5 [23.7,27.4] | 25.6 [24.3,26.8] |                                                          |
| ≥10                                         | 21.3 [18.7,24.1]           | 30.4 [28.3,32.5] | 12.8 [11.4,14.4]   | 31.7 [29.3,34.2] | 23.6 [22.1,25.2] |                                                          |
| Rural residence (vs. Urban or metropolitan) | 10.6 [8.9,12.5]            | 9.5 [8.0,11.2]   | 39.0 [36.3,41.7]   | 18.1 [16.4,20.0] | 24.0 [22.2,25.8] | 0.00                                                     |
| Locality deprivation level                  |                            |                  |                    |                  |                  |                                                          |
| Very low/low                                | 81.2 [78.3,83.8]           | 85.8 [83.8,87.7] | 50.2 [47.0,53.4]   | 72.8 [70.2,75.3] | 65.1 [62.5,67.6] | 0.00                                                     |
| Middle                                      | 9.7 [7.7,12.1]             | 8.0 [6.4,9.8]    | 13.8 [11.8,16.2]   | 11.4 [9.5,13.8]  | 11.7 [9.8,13.9]  |                                                          |
| High/very high                              | 9.1 [7.3,11.3]             | 6.2 [5.0,7.7]    | 36.0 [32.8,39.3]   | 15.7 [13.8,18.0] | 23.3 [21.0,25.7] |                                                          |
| Ethnicity: Indigenous                       | 2.9 [2.2,3.9]              | 3.5 [2.7,4.6]    | 11.9 [10.0,14.1]   | 6.2 [4.9,7.9]    | 8.8 [7.4,10.3]   | 0.00                                                     |
| Quintile of socioeconomic status            |                            |                  |                    |                  |                  |                                                          |
| 1 <sup>st</sup>                             | 8.3 [6.5,10.5]             | 4.1 [3.3,5.1]    | 24.5 [22.4,26.9]   | 8.1 [7.0,9.4]    | 16.7 [15.3,18.2] | 0.00                                                     |
| 2 <sup>nd</sup>                             | 18.5 [15.9,21.5]           | 10.9 [9.6,12.3]  | 26.2 [24.3,28.2]   | 11.8 [10.4,13.4] | 21.0 [19.4,22.6] |                                                          |
| 3 <sup>rd</sup>                             | 22.4 [19.4,25.7]           | 19.3 [17.6,21.2] | 20.1 [18.3,22.0]   | 15.7 [14.1,17.4] | 20.3 [18.9,21.8] |                                                          |
| 4 <sup>th</sup>                             | 26.3 [22.9,30.1]           | 25.6 [23.4,27.9] | 16.8 [15.0,18.7]   | 24.7 [22.3,27.1] | 19.4 [17.9,21.1] |                                                          |
| 5 <sup>th</sup>                             | 24.5 [21.1,28.2]           | 40.1 [37.3,42.8] | 12.5 [10.7,14.5]   | 39.8 [37.0,42.7] | 22.5 [20.7,24.5] |                                                          |
| Medical Insurance (MI)                      |                            |                  |                    |                  |                  |                                                          |
| Social Security                             | 29.5 [26.6,32.7]           | 94.3 [93.2,95.3] | 6.8 [5.7,8.1]      | 39.1 [36.6,41.8] | 31.5 [29.7,33.3] | 0.00                                                     |
| SSPH                                        | 35.4 [32.1,38.8]           | 3.0 [2.3,3.8]    | 81.1 [79.3,82.9]   | 25.6 [23.6,27.8] | 41.4 [39.6,43.1] |                                                          |
| Private insurance                           | 0.0 [0.0,0.2]              | 0.1 [0.0,0.3]    | 0.0 [0.0,1.7]      | 1.0 [2.9,0.3]    | 0.1 [0.5,0.0]    |                                                          |
| No MI                                       | 35.1 [31.6,38.7]           | 2.6 [2.0,3.4]    | 12.1 [10.7,13.6]   | 33.5 [31.0,36.1] | 26.9 [25.6,28.3] |                                                          |
| Type of health problem                      |                            |                  |                    |                  |                  |                                                          |
| Acute health problems                       | 80.4 [77.7,83.0]           | 58.5 [56.3,60.6] | 65.7 [63.7,67.7]   | 71.0 [68.9,73.1] | 81.0 [79.7,82.3] | 0.00                                                     |
| Chronic health problems                     | 14.1 [12.0,16.5]           | 29.8 [27.7,32.0] | 24.3 [22.5,26.1]   | 20.1 [18.4,22.0] | 10.2 [9.4,11.1]  |                                                          |
| Other health problems                       | 5.5 [4.3,7.0]              | 11.8 [10.4,13.3] | 10.0 [8.9,11.3]    | 8.9 [7.8,10.1]   | 8.8 [8.0,9.6]    |                                                          |
| Perception of severity of health problem    |                            |                  |                    |                  |                  |                                                          |
| Mild                                        | 44.2 [41.1,47.4]           | 37.1 [34.9,39.4] | 40.4 [38.3,42.5]   | 36.2 [34.0,38.5] | 63.6 [61.9,65.2] | 0.00                                                     |
| Moderate/severe                             | 55.8 [52.6,58.9]           | 62.9 [60.6,65.1] | 59.6 [57.5,61.7]   | 63.8 [61.5,66.0] | 36.4 [34.8,38.1] |                                                          |

Difference estimates performed considering the effect of the survey design.

1 The variable of years of schooling was obtained directly from the interview data for subjects 15 years of age and older, and for individuals younger than 15 years the mean of years of schooling of the household members was used.

1  
2  
3  
4  
5 When the sample was stratified by insurance coverage, the results showed that a  
6  
7 significant percentage of users with SS or SSPH insurance attended private  
8  
9 services or DAPPs. Among DAPPs users, 30% and 35% reported as having SS or  
10  
11 SSPH coverage, respectively. Similarly, among private physician users, 39% had  
12  
13 SS and 26% had SSPH coverage.  
14  
15

16  
17 DAPPs users were economically better off than those who went to MoH facilities.  
18  
19 In comparison to the users of other health services and non-users, DAPPs users  
20  
21 were younger (51% were between 0 and 19 years old), with higher educational  
22  
23 level than MoH users and lower educational level than SS users. Most DAPPs  
24  
25 users lived in urban and metropolitan areas with a low level of deprivation (89% for  
26  
27 the former and 81% for the latter), whereas only 61% of MoH users lived in these  
28  
29 areas and 50% had low level of deprivation. 3% of DAPPs users were indigenous  
30  
31 vs. 12% of indigenous users receiving care from the MoH. DAPPs users were  
32  
33 equally distributed among the different socioeconomic levels. This is in contrast  
34  
35 with MoH users who were concentrated according to the poorest quintiles, whereas  
36  
37 SS and private services users were in the richest quintiles. Furthermore, acute  
38  
39 health problems encouraged more frequent attendance to DAPPs (80%) in  
40  
41 comparison with other groups. The users sought healthcare in the institutions in  
42  
43 which they were affiliated if they perceived that the problem was moderate to  
44  
45 severe.  
46  
47  
48  
49  
50

51  
52 Table 2 shows the multinomial model that confirms that users of DAPPs were  
53  
54 younger, mostly from urban and metropolitan areas and presented an acute  
55  
56  
57  
58  
59  
60

condition. Furthermore, those with SSPH insurance were more likely to visit DAPPs than private clinics.

**Table 2. Multinomial model of the association between utilization of services provided by DAPPs and patient characteristics, Mexico 2012**

|                                                          | Reference category: Non- users<br>Odds ratios (95% CI) reported |                             |                          |                          |
|----------------------------------------------------------|-----------------------------------------------------------------|-----------------------------|--------------------------|--------------------------|
|                                                          | DAPPs                                                           | Social Security             | Ministry of Health       | Private doctors          |
| Sex (Ref.: female)                                       |                                                                 |                             |                          |                          |
| Male                                                     | 0.863**<br>[0.786,0.947]                                        | 0.872**<br>[0.798,0.952]    | 0.798**<br>[0.742,0.859] | 0.920*<br>[0.850,0.996]  |
| Years of age (Ref.: ≥65)                                 |                                                                 |                             |                          |                          |
| ≤9                                                       | 3.739**<br>[2.986,4.683]                                        | 1.320**<br>[1.114,1.562]    | 2.061**<br>[1.771,2.398] | 2.264**<br>[1.932,2.654] |
| 10-19                                                    | 1.761**<br>[1.388,2.235]                                        | 0.623**<br>[0.514,0.754]    | 1.104<br>[0.939,1.298]   | 0.676**<br>[0.566,0.808] |
| 20-64                                                    | 1.249*<br>[1.008,1.547]                                         | 0.769**<br>[0.665,0.890]    | 0.880+<br>[0.770,1.006]  | 0.653**<br>[0.566,0.753] |
| Years of schooling (Ref.: 0 years)                       |                                                                 |                             |                          |                          |
| 1-6                                                      | 1.236+<br>[0.981,1.558]                                         | 1.067<br>[0.887,1.282]      | 1.051<br>[0.921,1.200]   | 0.917<br>[0.780,1.078]   |
| 7-9                                                      | 1.334*<br>[1.046,1.702]                                         | 1.069<br>[0.875,1.307]      | 1.050<br>[0.904,1.221]   | 1.264**<br>[1.059,1.509] |
| ≥10                                                      | 1.309*<br>[1.017,1.685]                                         | 1.054<br>[0.860,1.291]      | 1.057<br>[0.891,1.253]   | 1.581**<br>[1.316,1.898] |
| Place of residence (Ref.: urban or metropolitan)         |                                                                 |                             |                          |                          |
| Rural                                                    | 0.637**<br>[0.552,0.736]                                        | 0.838*<br>[0.732,0.959]     | 1.358**<br>[1.234,1.494] | 1.025<br>[0.918,1.145]   |
| Locality deprivation level (Ref.: low, very low level)   |                                                                 |                             |                          |                          |
| Middle                                                   | 0.818**<br>[0.703,0.952]                                        | 1.084<br>[0.936,1.256]      | 1.051<br>[0.936,1.180]   | 1.421**<br>[1.254,1.611] |
| High, very high                                          | 0.551**<br>[0.464,0.655]                                        | 0.858+<br>[0.720,1.022]     | 0.978<br>[0.869,1.102]   | 1.278**<br>[1.116,1.464] |
| Ethnicity (Ref.:non-indigenous)                          |                                                                 |                             |                          |                          |
| Indigenous                                               | 0.647**<br>[0.519,0.806]                                        | 0.959<br>[0.782,1.175]      | 1.171**<br>[1.039,1.319] | 1.014<br>[0.870,1.182]   |
| Quintile of socioeconomic status (Ref.: 5th)             |                                                                 |                             |                          |                          |
| 1st                                                      | 0.497**<br>[0.406,0.608]                                        | 0.669**<br>[0.546,0.818]    | 1.120<br>[0.957,1.311]   | 0.224**<br>[0.189,0.264] |
| 2nd                                                      | 0.834*<br>[0.712,0.977]                                         | 0.886<br>[0.764,1.028]      | 1.176*<br>[1.016,1.361]  | 0.345**<br>[0.301,0.396] |
| 3rd                                                      | 0.949<br>[0.819,1.100]                                          | 0.966<br>[0.846,1.103]      | 1.088<br>[0.940,1.258]   | 0.462**<br>[0.408,0.524] |
| 4th                                                      | 1.080<br>[0.936,1.246]                                          | 1.034<br>[0.915,1.169]      | 1.157+<br>[0.996,1.343]  | 0.711**<br>[0.633,0.799] |
| Medical insurance (Ref.: no insurance)                   |                                                                 |                             |                          |                          |
| Social Security                                          | 0.676**<br>[0.597,0.765]                                        | 27.495**<br>[22.495,33.607] | 0.514**<br>[0.440,0.599] | 0.871**<br>[0.785,0.966] |
| SSPH                                                     | 0.769**<br>[0.686,0.862]                                        | 0.802+<br>[0.625,1.029]     | 3.822**<br>[3.444,4.241] | 0.596**<br>[0.539,0.659] |
| Type of health problem (Ref.: chronic health problems)   |                                                                 |                             |                          |                          |
| Acute                                                    | 0.730**<br>[0.630,0.847]                                        | 0.298**<br>[0.264,0.336]    | 0.364**<br>[0.327,0.405] | 0.425**<br>[0.380,0.476] |
| Other                                                    | 0.566**<br>[0.451,0.710]                                        | 0.502**<br>[0.424,0.595]    | 0.435**<br>[0.376,0.504] | 0.530**<br>[0.451,0.623] |
| Perception of health problem (Ref.: mild health problem) |                                                                 |                             |                          |                          |
| Moderate/severe                                          | 2.336**<br>[2.123,2.571]                                        | 2.663**<br>[2.430,2.918]    | 2.192**<br>[2.032,2.364] | 3.044**<br>[2.802,3.307] |
| Observations                                             |                                                                 |                             |                          | 25,620                   |
| AIC                                                      |                                                                 |                             |                          | 61,461                   |
| Log likelihood                                           |                                                                 |                             |                          | -30,618                  |
| LR $\chi^2$                                              |                                                                 |                             |                          | 15,399                   |
| Prob > $\chi^2$                                          |                                                                 |                             |                          | 0.000                    |
| McFadden R <sup>2</sup>                                  |                                                                 |                             |                          | 0.201                    |

Note: Persons with private medical insurance were excluded.

\*\*p<0.01,\*p<0.05;+p<0.10.

1  
2  
3  
4  
5  
6 The reasons for using specific health services and perception of quality of care are  
7  
8 presented in Table 3. The top three reasons for using DAPPs were that these  
9  
10 services were inexpensive, conveniently located and had a short waiting time;  
11  
12 whereas the main reason to use SS and MoH services was to have an affiliation  
13  
14 with such institutions. Users of private doctors mentioned more often (29%) that  
15  
16 they knew the doctor and liked the care provided as the main reasons for attending  
17  
18 the private doctor's office.  
19  
20

21  
22 Regarding the average number of medicines per encounter, DAPPs users received  
23  
24  $\geq 3$  medicines more often (67%) than users of private doctors (56%) and public  
25  
26 institutions (SS 54%; MoH 45%). A higher percentage of DAPPs and private  
27  
28 practice users received information about the diagnosis and prescribed medicines  
29  
30 than those of public institutions. DAPPs users also had better perception of the  
31  
32 quality of healthcare (good/very good quality: DAPPs 89%, private doctor 93%)  
33  
34 than other users (SS 78%; MoH 83%) and would return to the same healthcare  
35  
36 provider. The main reason for not returning to DAPPs was lack of health  
37  
38 improvement. For the SS and MoH, the reasons for not returning were long waiting  
39  
40 time, inconsiderate healthcare providers and incomplete provision of prescribed  
41  
42 medicines.  
43  
44  
45  
46  
47  
48  
49  
50  
51  
52  
53  
54  
55  
56  
57  
58  
59  
60

**Table 3. Reasons for using ambulatory health services of different providers and perception of quality, Mexico 2012\***

|                                                                      | DAPPs            | Social Security  | Ministry of Health | Private doctors  | <i>p-value corrected by survey design effect</i> |
|----------------------------------------------------------------------|------------------|------------------|--------------------|------------------|--------------------------------------------------|
| Observations                                                         |                  |                  |                    |                  |                                                  |
| Sample                                                               | 1,778            | 3,840            | 4,569              | 2,612            |                                                  |
| %                                                                    | 13.89            | 30               | 35.7               | 20.41            |                                                  |
| Weighted                                                             | 1,504,746        | 2,912,390        | 2,602,144          | 2,128,578        |                                                  |
| %                                                                    | 16.45            | 31.84            | 28.45              | 23.27            |                                                  |
| <i>Estimation [95% CI]</i>                                           |                  |                  |                    |                  |                                                  |
| Main reasons for using specific healthcare services                  |                  |                  |                    |                  |                                                  |
| Having insurance                                                     | 1.5 [0.7,2.2]    | 88.5 [86.8,90.2] | 59.4 [57.0,61.8]   | 2.7 [1.9,3.6]    | 0.00                                             |
| Convenient to home                                                   | 32.5 [29.1,36.0] | 6.3 [5.1,7.4]    | 25.2 [23.3,27.2]   | 16.6 [14.4,18.8] | 0.06                                             |
| Inexpensive                                                          | 33.6 [30.0,37.2] | 10.2 [8.6,11.9]  | 22.1 [20.2,24.0]   | 4.7 [3.7,5.8]    | 0.00                                             |
| Familiar with the doctor                                             | 8.1 [5.5,10.7]   | 2.1 [1.4,2.7]    | 2.7 [1.8,3.6]      | 29.1 [26.2,31.9] | 0.00                                             |
| User likes care provided                                             | 16.0 [12.9,19.1] | 6.0 [5.0,7.1]    | 8.2 [7.1,9.4]      | 28.2 [25.7,30.8] | 0.00                                             |
| Short waiting time                                                   | 26.5 [23.5,29.6] | 2.3 [1.6,3.0]    | 2.8 [2.1,3.4]      | 22.1 [19.7,24.5] | 0.68                                             |
| Other                                                                | 18.7 [16.0,21.4] | 4.8 [3.7,5.9]    | 10.2 [8.7,11.8]    | 24.2 [21.6,26.7] | 0.00                                             |
| Quality of health care                                               |                  |                  |                    |                  |                                                  |
| Number of prescribed medicines                                       |                  |                  |                    |                  |                                                  |
| 0                                                                    | 1.6 [0.9,2.8]    | 10.3 [9.0,11.8]  | 11.1 [9.8,12.5]    | 5.4 [4.2,6.8]    | 0.00                                             |
| 1                                                                    | 8.3 [6.7,10.3]   | 10.7 [9.4,12.3]  | 12.0 [10.8,13.3]   | 9.9 [8.3,11.6]   |                                                  |
| 2                                                                    | 22.9 [20.3,25.7] | 25.2 [23.2,27.3] | 32.2 [30.2,34.3]   | 29.1 [26.7,31.6] |                                                  |
| ≥3                                                                   | 67.2 [64.2,70.1] | 53.8 [51.6,55.9] | 44.7 [42.5,47.0]   | 55.7 [52.8,58.6] |                                                  |
| % of users who received information about their diagnosis            | 90.3 [87.8,92.3] | 84.3 [82.5,85.9] | 84.5 [82.9,85.9]   | 92.7 [90.9,94.1] | 0.00                                             |
| % of users who received information about prescribed medications     | 92.3 [90.0,94.0] | 85.5 [83.8,87.0] | 86.8 [85.3,88.2]   | 93.7 [92.1,95.0] | 0.00                                             |
| Perception about the quality of health care services                 |                  |                  |                    |                  |                                                  |
| Good/Very good                                                       | 88.8 [86.4,90.8] | 77.7 [75.5,79.7] | 83.1 [81.4,84.7]   | 93.2 [91.5,94.5] | 0.00                                             |
| Regular                                                              | 10.2 [8.2,12.5]  | 16.7 [14.9,18.6] | 13.4 [12.0,14.9]   | 5.7 [4.6,7.1]    |                                                  |
| Bad/very bad                                                         | 1.1 [0.6,1.9]    | 5.7 [4.6,7.0]    | 3.5 [2.8,4.5]      | 1.1 [0.5,2.4]    |                                                  |
| Users who will return to the same place for healthcare               | 90.1 [87.3,92.4] | 81.8 [79.8,83.7] | 87.7 [86.1,89.1]   | 93.4 [91.8,94.7] | 0.00                                             |
| Reasons for not returning                                            |                  |                  |                    |                  |                                                  |
| Inconsiderate healthcare providers                                   | 4.7 [2.3,9.7]    | 32.0 [27.1,37.3] | 25.4 [20.0,31.7]   | 9.1 [3.9,19.8]   | 0.00                                             |
| Disagree with the diagnosis or treatment                             | 16.4 [10.4,25.0] | 18.9 [14.6,24.1] | 15.7 [12.1,20.1]   | 23.7 [14.6,36.1] | 0.44                                             |
| Lack of health improvement                                           | 27.9 [17.1,41.9] | 18.7 [14.6,23.8] | 16.9 [12.6,22.3]   | 32.0 [21.5,44.6] | 0.03                                             |
| High cost of healthcare services                                     | 9.8 [4.4,20.5]   | 0.5 [0.1,1.6]    | 1.4 [0.7,2.6]      | 19.7 [11.3,32.2] | 0.00                                             |
| Failure to provide or incomplete provision of prescribed medications | 3.3 [1.2,8.6]    | 20.6 [16.1,25.9] | 20.8 [16.0,26.5]   | 0.2 [0.0,1.3]    | 0.00                                             |
| Failure to provide information about the health problem & treatment  | 11.4 [5.9,21.1]  | 14.0 [10.8,18.0] | 8.6 [5.1,14.1]     | 4.0 [1.9,8.1]    | 0.04                                             |
| Long waiting time                                                    | 2.4 [0.8,7.1]    | 40.5 [34.6,46.7] | 31.7 [25.9,38.1]   | 2.2 [0.8,6.2]    | 0.00                                             |
| Other reasons                                                        | 5.3 [2.6,10.6]   | 11.1 [7.9,15.3]  | 8.4 [5.8,12.2]     | 2.3 [0.9,6.0]    | 0.01                                             |
| Waiting time (in minutes) Median of [IQR]**                          | 10.0 [5.0-25.0]  | 30.0 [15.0,90.0] | 60.0 [15.0,120]    | 10.0 [5.0,30.0]  | 0.00                                             |

\*Difference estimates performed considering the effect of the survey design.

\*\*p value estimated from quantile regression models.

1  
2  
3  
4  
5  
6  
7  
8  
9  
10  
11  
12  
13  
14  
15  
16  
17  
18  
19  
20  
21  
22  
23  
24  
25  
26  
27  
28  
29  
30  
31  
32  
33  
34  
35  
36  
37  
38  
39  
40  
41  
42  
43  
44  
45  
46  
47  
48  
49

Table 4 shows out-of-pocket expenditures for attending ambulatory care. DAPPs and MoH users were less likely to pay for transportation (41% and 39%) than SS and private doctors' users (58% and 51%). Also, DAPPs users spent less on transportation (MXN25.00) when compared to other users. The probability of spending on consultations (88% and 87%) and on medicines (97% and 89%) was much higher for DAPPs and private clinic users when compared to other users; the lowest probability was for users affiliated with the SS (2% and 12% respectively). DAPPs users spent less on consultation and medicines (average cost of consultation was Mx\$30; average cost of medicines was Mx\$200) than private doctors' users (consultation Mx\$200, medicines MX\$350).

**Table 4. Out-of-pocket expenditures to attend ambulatory healthcare, Mexico 2012**

|                                                  | Transportation expenditures |                                  | Medical visit expenditures |                                  | Medicine expenditures |                                  |
|--------------------------------------------------|-----------------------------|----------------------------------|----------------------------|----------------------------------|-----------------------|----------------------------------|
|                                                  | Probability [CI]            | Median [IQR]<br>Mexican currency | Probability [CI]           | Median [IQR]<br>Mexican currency | Probability [CI]      | Median [IQR]<br>Mexican currency |
| DAPPs users                                      | 0.41 [0.37,0.44]            | 25.0 [14.0,50.0]                 | 0.88 [0.86,0.90]           | 30.0 [25.0,35.0]                 | 0.97 [0.96,0.98]      | 200 [115.0,280.0]                |
| Social Security users                            | 0.58 [0.55,0.60]            | 28.0 [15.0,50.0]                 | 0.02 [0.02,0.03]           | 60.0 [40.0,125.0]                | 0.12 [0.11,0.14]      | 300.0 [120.0,740.0]              |
| Ministry of Health users                         | 0.39 [0.37,0.42]            | 30.0 [14.0,60.0]                 | 0.11 [0.09,0.12]           | 42.0 [20.0,85.0]                 | 0.32 [0.30,0.34]      | 200 [79.0,400.0]                 |
| Private medical doctor users                     | 0.51 [0.48,0.54]            | 50.0 [20.0,100.0]                | 0.87 [0.85,0.89]           | 200.0 [100.0,350.0]              | 0.89 [0.87,0.90]      | 350.0 [200.0,600.0]              |
| <i>p value corrected by survey design effect</i> | 0.941                       | 0.000                            | 0.000                      | 0.000                            | 0.000                 | 0.000                            |

Note: Weighted estimations; p value estimated from linear regression models for the probability reported and quantile regression models in the case of the median expenditure.



## DISCUSSION

The main results show that DAPPs resulted in being an important key player in the healthcare sector. The positive effect is the wide acceptance of the public to attend these services because it facilitates access to ambulatory care. However, DAPPs poses a series of challenges to reach the objectives of the current health policies: (i) users pay out-of-pocket for medical visits and medications, counteracting financial protection policies; (ii) the high rate of prescribed medications alarms potential flaws in the quality of care in these facilities, undermining the efforts to improve quality of care; (iii) represents a conflict of interest for healthcare providers given that the medical doctors work for the pharmacies, jeopardizing both financial protection and quality of care.

The public has demonstrated a favourable response for attending DAPPs facilities despite the fact that according to the authorities, almost 80% of the population is affiliated with a public medical insurance. [24] This is congruent with the finding in our study that 25% did not have medical insurance, and this proportion was higher among DAPP users.

The fact that two thirds of DAPP users have medical insurance can have different interpretations. The rapid increase of DAPPs indicates the magnitude of the gap of the public healthcare sector to fulfill the demand in urban and metropolitan areas. DAPP users were willing to pay because these services were apparently inexpensive, conveniently located and with immediate access; also, by attending DAPPs, users avoided long waiting times, inconsiderate healthcare providers and the incomplete provision of prescribed medicines with the public healthcare sector.

1  
2  
3 DAPPs promote inequity and out-of-pocket expenditures because its users pay for  
4 the medications and often for the visit. This undermines the potential gains of the  
5 public policy of financial protection. Between 2003 and 2010, the public health  
6 spending aimed at people without social security protection increased 81%,  
7 whereas the percentage of total health expenditures from out-of-pocket  
8 expenditures decreased by 3%, from 52% to 49%. This means that for every  
9 percentage point increase in public spending for persons without social security,  
10 there was a reduction of 0.04% in out-of-pocket spending. [25] This suggests that  
11 despite the increase in public resources for persons without social security, this  
12 has not yet reduced out-of-pocket expenditures, which is one of the main  
13 objectives of the financial reform. Our data shows that the probability of spending  
14 on medicine was higher for DAPP users than for users of other providers. Although  
15 the amount they spent is not as large as the out-of-pocket spending of users of  
16 private physicians, for those affiliated with a public institution it means additional  
17 financial burden. This could be a wake-up call to put into practice innovative and  
18 efficient patient-centered health service models focused on providing financial  
19 protection.

20  
21  
22 The presence of DAPPs in the health sector sends the signal that the Mexican  
23 regulation has a double standard for private doctors. Current regulations of the  
24 Ministry of Health for private pharmacies literally forbid their “direct communication,  
25 through windows, doors or aisles, with other businesses, such as doctor’s offices  
26 [...]” [26]. The rapid expansion of DAPPs shows that this regulation is either  
27 imprecise or subject to interpretations, or there is weakness of the health authority  
28 to enforce it. This situation could be interpreted as an unspoken public policy of

1  
2  
3 laissez faire to deal with the dilemma of favoring access to healthcare vs.  
4  
5 reinforcing the observance of the regulations.  
6

7  
8 Despite the fact that ENSANUT 2012 did not gather in-depth quality of care  
9  
10 information, the results show that DAPPs users were prescribed an excessive  
11  
12 number of medicines. Almost two thirds of users received, on average, three or  
13  
14 more medications, despite the fact that most were young and sought ambulatory  
15  
16 care for acute health problems, mainly mild acute respiratory illnesses (ARI).  
17  
18 Globally, most incidences of inappropriate use of antibiotics occur in ARI. Given  
19  
20 the large number of medicines prescribed in DAPPs consultations, it is likely that  
21  
22 this may be derived from over-prescription of antibiotics. This requires in-depth  
23  
24 analyses.  
25  
26  
27

28  
29 DAPPs represent a conflict of interest because the pharmacies hire the medical  
30  
31 doctors to run the pharmacy-owned examining rooms and link the processes of  
32  
33 prescription and sale of medications. According to Brody, "*conflicts of interest,*  
34  
35 *whether individual or organizational, occur when one enters into arrangements that*  
36  
37 *reasonably tempt one to put aside one's primary obligations (patients' safety) in*  
38  
39 *favor of secondary interests, such as financial self-interest*". [27] The staff of  
40  
41 DAPPs is being paid a salary plus commissions derived from the prescriptions. [28]  
42  
43 This may encourage unjustified prescribing. This assumption is supported by  
44  
45 studies from other countries where the merge of medicine prescribing and  
46  
47 dispensing [14, 29] or exposure to information from pharmaceutical companies [30]  
48  
49 affected prescription choices, prompting physicians to not necessarily act in the  
50  
51 best interest of patients, resulting in higher prescribing frequency, higher costs, and  
52  
53 lower prescribing quality. The high number of prescribed medications indicates that  
54  
55  
56  
57  
58  
59  
60

1  
2  
3 medical doctors working for DAPPs may have financial incentives to prescribe  
4 certain products. The problem of overprescribing results in poly-pharmacy,  
5 increased out-of-pocket expenditures, increased risk of adverse medication  
6 reactions and, in the case of antibiotics, resistance. This complex situation  
7 jeopardizes the objectives of the policy to sell antibiotics only with a physician's  
8 prescription.  
9

10 The growing presence of DAPPs contributes to the healthcare market failure in the  
11 Mexican context. The main health policies are focused on promoting a supplier-  
12 induced demand of public health sector services. Although, the quantity of  
13 ambulatory healthcare (medical visits and medications) demanded does not equate  
14 to the supply by the public health sector. A contributing factor is the asymmetry of  
15 information between consumers and providers, which is a feature of health markets  
16 and recognised as a cause of market failure. [31] Patients are usually poorly  
17 informed consumers who fail to recognize high quality service; for example, in the  
18 present study, the interviewees attended DAPPs because it seemed to be  
19 convenient, rather than for the high quality of care offered. Availability of  
20 Information about healthcare effectiveness and quality of the services is necessary  
21 for rational decision-making. It is advisable to collect data and provide to the  
22 consumers this type of information in order to enable them to make an informed  
23 choice to meet their own individual needs.  
24  
25  
26  
27  
28  
29  
30  
31  
32  
33  
34  
35  
36  
37  
38  
39  
40  
41  
42  
43  
44  
45  
46  
47  
48  
49

50 Apparently, the public sector has an unrecognized conflict between reinforcing the  
51 regulation, promoting high quality care and proper use of medications vs. allowing  
52 the growing supply of this type of ambulatory care providers to absorb the spill-over  
53 of the demand for consultations and medicines, regardless of the quality and cost.  
54  
55  
56  
57  
58  
59  
60

1  
2  
3 Little attention is being paid to developing policies aimed at regulating and taking  
4 advantage of the role of the private market to enhance competition and improve  
5 the quality of healthcare. The findings support the assumption that is necessary to  
6 strengthen the stewardship of the MoH in the private sector, along with the urgent  
7 need to consolidate a national pharmaceutical policy.  
8  
9

10 The study has several limitations. It is a secondary data analysis of a cross-  
11 sectional study; thus, no longitudinal data are available to ascertain the changes of  
12 DAPPs services over time. Also, the available information did not allow in-depth  
13 evaluation of the quality of prescriptions. The information was gathered through  
14 interviews during home visits; therefore, the quality of the data depends on user  
15 recall. To mitigate this potential bias, the questions only addressed the prior 15-day  
16 period. Further and detailed information about the contracts and remunerations of  
17 DAPPs physicians is necessary in order to better evaluate the magnitude of the  
18 conflict of interest.  
19  
20  
21  
22  
23  
24  
25  
26  
27  
28  
29  
30  
31  
32  
33  
34  
35

## 36 **CONCLUSION**

37 DAPPs have become an important player in Mexican healthcare, but they are an  
38 “elephant in the room.” This metaphor indicates an obvious truth that is either being  
39 ignored, or goes on unaddressed. As was mentioned earlier, DAPPs have been  
40 functioning for more than a decade; their number reach 10,000, providing 250,000  
41 medical visits every day. However, their functioning and regulation have been  
42 unaddressed by health policies. It was very recently (late 2013), that COFEPRIS  
43 (Spanish acronym for the Federal Commission for Protection against Sanitary  
44 Risks) issued “Guidelines for good practices” for pharmacies with doctor’s offices.  
45 These guidelines compile a list of current regulations for pharmacies, on the one  
46  
47  
48  
49  
50  
51  
52  
53  
54  
55  
56  
57  
58  
59  
60

1  
2  
3 hand, and for ambulatory health services, on the other, but do not address the  
4  
5 central issues of preventing conflict of interest, or assessing quality of care. The  
6  
7 findings of this study support the notion that DAPPs counteract current financial  
8  
9 protection policies since a significant percentage of users were affiliated with a  
10  
11 public institution and reported higher out-of-pocket spending and higher number of  
12  
13 medicines prescribed than users of other providers. Additionally, these results  
14  
15 should prompt to learn more about the quality of care of DAPPs, which may arise  
16  
17 from the conflict of interest implicit in the linkage of prescribing and dispensing  
18  
19 processes. Addressing these aspects through rigorous studies can provide  
20  
21 evidence pertinent to improve the current pharmaceutical policies in Mexico.  
22  
23  
24  
25  
26  
27  
28  
29  
30  
31  
32  
33  
34  
35  
36  
37  
38  
39  
40  
41  
42  
43  
44  
45  
46  
47  
48  
49  
50  
51  
52  
53  
54  
55  
56  
57  
58  
59  
60

## CONTRIBUTORS

1  
2  
3  
4  
5  
6  
7  
8  
9  
10  
11  
12  
13  
14  
15  
16  
17  
18  
19  
20  
21  
22  
23  
24  
25  
26  
27  
28  
29  
30  
31  
32  
33  
34  
35  
36  
37  
38  
39  
40  
41  
42  
43  
44  
45  
46  
47  
48  
49  
50  
51  
52  
53  
54  
55  
56  
57  
58  
59  
60

RPC, MHA, SVD, VJW, AD conceptualized the study. SVD, AD conducted the literature review. RPC, SVD, ESM, VJW, MHA designed the study. ESM analysed the data. RPC, SVD, VJW, ESM, AD, MHA interpreted the data, wrote the manuscript and approved the final draft.

## FUNDING

This research received no specific grant from any funding agency in the public, commercial or not-for-profit sectors.

## COMPETING INTERESTS

There is no financial interest to disclose.

## ETHICS STATEMENT

This study is a secondary data analysis of the ENSANUT 2012. The data for the analysis were requested and obtained from the surveys public repository hosted at the National Institute of Public Health webpage at: <http://ensanut.insp.mx/>. This repository has the data already de-identified; thus it is not possible to trace any of the data to the actual individual. In accordance to the Internal Regulation of the Research Ethics Committee of the National Institute of Public Health, this secondary analysis was considered exempt of approval.

## REFERENCES

1. Organisation for Economic Co-operation and Development. OECD Health Data 2013: How Does Mexico Compare. Organisation for Economic Co-operation and Development, 2013. <http://www.oecd.org/mexico/Briefing-Note-MEXICO-2013.pdf>.
2. Organisation for Economic Co-operation and Development. An Overview of Growing Income Inequalities in OECD Countries: Main Findings. Organisation for Economic Co-operation and Development , 2011. <http://www.oecd.org/els/soc/49499779.pdf>.
3. Wirtz VJ, Reich MR, Leyva-Flores R, et al. Medicines in Mexico, 1990-2004: systematic review of research on access and use. *Salud Publica Mex* 2008;**50**:S470-S479.
4. Knaul FM, González-Pier E, Gómez-Dantés O, et. al. The quest for universal health coverage: achieving social protection for all in Mexico. *Lancet* 2012; **380**:1259-1279.
5. Fundación Mexicana para la Salud: Trabajando por la salud de la población. Propuestas de política para el sector farmacéutico. Versión para el diálogo. FUNSALUD, A.C., 2011. [http://www.funsalud.org.mx/eventos\\_2011/trabajando%20por%20la%20salud/Doc%20PolPublSFarm%20vFDigital%20060511.pdf](http://www.funsalud.org.mx/eventos_2011/trabajando%20por%20la%20salud/Doc%20PolPublSFarm%20vFDigital%20060511.pdf).



- 1  
2  
3 6. Dreser A, Vázquez-Vélez E, Treviño S, et al. Regulation of antibiotic sales  
4 in Mexico: an analysis of printed media coverage and stakeholder  
5 participation. BMC Public Health 2012 Dec;12 (1051).  
6  
7 <http://www.biomedcentral.com/1471-2458/12/1051> (accessed 6 March  
8 2013).  
9
- 10  
11 7. Federal Commission for Protection against Sanitary Risks (COFEPRIS).  
12 Strategies to regulate doctor's offices adjacent to private pharmacies.  
13 <http://www.cofepris.gob.mx/Paginas/Inicio.aspx>. (accessed 30 March  
14 2014).  
15
- 16  
17 8. Rodwin M, Okamoto A. Physicians' conflicts of interest in Japan and the  
18 United States: lessons for the United States. J Health Polit Policy Law 2000;  
19 **25**: 343–375.  
20
- 21  
22 9. Kwon S. Pharmaceutical reform and physician strikes in Korea: separation  
23 of drug prescribing and dispensing. Soc Sci Med 2003;**57**: 529-538.  
24
- 25  
26 10. Liu X, Mills A. The influence of bonus payments to doctors on hospital  
27 revenue: results of a quasi-experimental study. Appl Health Econ Health  
28 Policy 2003;**2**:91-98.  
29
- 30  
31 11. Sun Q, Santoro MA, Meng Q, et al. Pharmaceutical policy in China. Health  
32 Aff (Millwood) 2008;**27**:1042-1050.  
33
- 34  
35 12. Trap B, Hansen EH, Hogerzeil H. Prescription habits of dispensing and non-  
36 dispensing doctors in Zimbabwe. Health Policy Plan 2002; **17**: 288–295.  
37
- 38  
39 13. Park S, Soumerai SB, Adams AS, et al. Antibiotic use following a Korean  
40 national policy to prohibit medication dispensing by physicians. Health  
41 Policy Plan 2005;**20**: 302-309.  
42  
43  
44  
45  
46  
47  
48  
49  
50  
51  
52  
53  
54  
55  
56  
57  
58  
59  
60

- 1  
2  
3 14. Chou YJ, Yip WC, Lee CH, et al. Impact of separating drug prescribing and  
4  
5 dispensing on provider behaviour: Taiwan's experience. Health Policy  
6  
7 Planning 2003;**18**: 316-329.  
8  
9
- 10 15. Romero-Martínez M, Shamah-Levy T, Franco-Núñez A, et al. National  
11  
12 Health and Nutrition Survey 2012: design and coverage. Salud Publica Mex  
13  
14 2013; **55**:S332-S340.  
15  
16
- 17 16. Brown C, Pagán J, Rodríguez-Oreggia E. The decision-making process of  
18  
19 health-care utilization in Mexico. Health Policy 2005;**72**: 81-91.  
20  
21
- 22 17. López-Ceballos D, Chi C. Health-care utilization in Ecuador: a multilevel  
23  
24 analysis of socio-economic determinants and inequality issues. Health  
25  
26 Policy Plan 2010; **25**: 209-218.  
27  
28
- 29 18. Valdivia M. Public health infrastructure and equity in the utilization of  
30  
31 outpatient health-care services in Peru. Health Policy Plan 2002;**17**: 12-19.  
32  
33
- 34 19. Comisión Nacional para el Desarrollo de los Pueblos Indígenas (CDI). Los  
35  
36 hogares y la población indígena.  
37  
38 [http://www.cdi.gob.mx/index.php?id=211&option=com\\_content&task=view,](http://www.cdi.gob.mx/index.php?id=211&option=com_content&task=view)  
39  
40 2009 (accessed 6 March 2013).  
41  
42
- 43 20. Consejo Nacional de Población (CONAPO). Índice de marginación por  
44  
45 localidad. <http://www.conapo.gob.mx/es/CONAPO> (accessed 20 March  
46  
47 2013).  
48  
49
- 50 21. Kolenikov S, Angeles G. The use of discrete data in PCA: theory,  
51  
52 simulations, and applications to socioeconomic indices. Chapel Hill:  
53  
54 Carolina Population Center, University of North Carolina, 2004.  
55  
56  
57  
58  
59  
60

- 1  
2  
3  
4  
5  
6  
7  
8  
9  
10  
11  
12  
13  
14  
15  
16  
17  
18  
19  
20  
21  
22  
23  
24  
25  
26  
27  
28  
29  
30  
31  
32  
33  
34  
35  
36  
37  
38  
39  
40  
41  
42  
43  
44  
45  
46  
47  
48  
49  
50  
51  
52  
53  
54  
55  
56  
57  
58  
59  
60
22. McKenzie DJ. Measuring inequality with asset indicators. *J Popul Econ* 2005; 2(229).  
<http://siteresources.worldbank.org/DEC/Resources/finaljpopmckenzie1.pdf>.  
(accessed 2 February 2013).
23. Hosmer D, Lemeshow S. *Applied Logistic Regression*. Second Ed., Canada: Wiley Series in Probability and Statistics, 2000.
24. Ministry of Health. Health Sector Program 2013-2018. *Diario Oficial de la Federación* 12.12.2013. México, 2013.
25. Muñoz O, Rodríguez-Ortega E, Pérez-Cuevas R, et al. Propuesta de un Sistema Nacional de Servicios de Salud: componente de salud de una propuesta de seguridad social universal. Documento elaborado por el Centro de Estudios Económicos y Sociales en Salud (CEESES) del Hospital Infantil de México Federico Gómez (HIMFG) para el Consejo Nacional de Evaluación de la Política de Desarrollo Social (CONEVAL). México: UNAM, Seminario sobre Medicina y Salud, 2012.
26. *Farmacopea de los Estados Unidos Mexicanos*. Suplemento para establecimientos dedicados a la venta y suministro de medicamentos y otros insumos para la salud. México: Secretaría de Salud, 2010.
27. Brody H. Professional medical organizations and commercial conflicts of interest: ethical issues. *Ann Fam Med* 2010;**8**:354-358.
28. Leyva-Piña MA, Pichardo-Palacios S. Los médicos de las Farmacias Similares: Degradación de la profesión médica? *Polis* 2012;**8**:143-175.
29. Iizuka T. Experts' agency problems: evidence from the prescription drug market in Japan. *Rand J Econ* 2007;**38**:844-862.

- 1  
2  
3 30. Spurling GK, Mansfield PR, Montgomery BD, et al. Information from  
4  
5 pharmaceutical companies and the quality, quantity, and cost of physicians'  
6  
7 prescribing: a systematic review. PLoS Med 2010 Oct;7 (10): e1000352.  
8  
9 [http://www.plosmedicine.org/article/info%3Adoi%2F10.1371%2Fjournal.pme](http://www.plosmedicine.org/article/info%3Adoi%2F10.1371%2Fjournal.pmed.1000352)  
10  
11 [d.1000352](http://www.plosmedicine.org/article/info%3Adoi%2F10.1371%2Fjournal.pmed.1000352) (accessed 15 January 2013).  
12  
13  
14  
15 31. Watts JJ, Segal L. Market failure, policy failure and other distortions in  
16  
17 chronic disease markets. BMC Health Serv Res 2009 Jun;9:102.  
18  
19  
20  
21  
22  
23  
24  
25  
26  
27  
28  
29  
30  
31  
32  
33  
34  
35  
36  
37  
38  
39  
40  
41  
42  
43  
44  
45  
46  
47  
48  
49  
50  
51  
52  
53  
54  
55  
56  
57  
58  
59  
60

1  
2  
3  
4  
5  
6  
7  
8  
9  
10  
11  
12  
13  
14  
15  
16  
17  
18  
19  
20  
21  
22  
23  
24  
25  
26  
27  
28  
29  
30  
31  
32  
33  
34  
35  
36  
37  
38  
39  
40  
41  
42  
43  
44  
45  
46  
47  
48  
49  
50  
51  
52  
53  
54  
55  
56  
57  
58  
59  
60

# EFFECTS OF THE EXPANSION OF DOCTORS' OFFICES ADJACENT TO PRIVATE PHARMACIES IN MEXICO: **SECONDARY** **DATA** ANALYSIS OF A NATIONAL SURVEY

**Corresponding author:** \*Anahí Dreser. Instituto Nacional de Salud Pública.

Avenida Universidad 655, Cuernavaca, Morelos 62100, México. Email:

[anahi.dreser@insp.mx](mailto:anahi.dreser@insp.mx). Telephone +52 (777) 329-3000 ext. 5309.

**Authors:** Ricardo Pérez-Cuevas <sup>(1)</sup>, Svetlana V. Doubova <sup>(2)</sup>, Veronika J. Wirtz <sup>(3,4)</sup>, Edson Serván-Mori <sup>(4)</sup> Anahí Dreser <sup>(4)</sup>\*, Mauricio Hernández-Ávila <sup>(5)</sup>

(1) Division of Social Protection and Health, Inter-American Development Bank, Mexico, D.F., Mexico

(2) Epidemiology and Health Services Research Unit, CMN Siglo XXI, Mexican Institute of Social Security, Mexico, D.F., Mexico

(3) Center for Global Health and Development (CGHD), Boston University, Boston, MA

(4) Centre for Health Systems Research, National Institute of Public Health, Cuernavaca, Mexico.

(5) General Director, National Institute of Public Health, Cuernavaca, Mexico.

**Running title:** Doctors' offices adjacent to private pharmacies in Mexico

**Keywords:** *Community pharmacy, Physician prescribing patterns, Conflict of interest, Health expenditures, Mexico.*

**Word count:** 3, 826

**ABSTRACT**

**Objectives:** To compare the sociodemographic characteristics, reasons for attending, perception of quality, and associated out-of-pocket (OOP) expenditures of doctors' offices adjacent to private pharmacies (DAPPs) users with users of Social Security (SS), Ministry of Health (MoH), private doctor's offices independent from pharmacies, and non-users.

**Setting:** Secondary data analysis of the 2012 National Survey of Health and Nutrition of Mexico.

**Participants:** The study population comprised 25,852 individuals identified as having had a health problem 15 days before the survey, and a random sample of 12,799 ambulatory health services users.

**Outcome measures:** Sociodemographic characteristics, reasons for attending healthcare services, perception of quality and associated OOP expenditures.

**Results:** The distribution of users was as follows: DAPPs (9.2%), SS (16.1%), MoH (20.9%), private providers (15.4%), and nonusers (38.5%); 65% of DAPPs users were affiliated with a public institution (MoH 35%, SS 30%) and 35% reported not having health coverage. DAPPs users considered the services inexpensive, convenient, and with a short waiting time, yet they received  $\geq 3$  medications more often (67.2%, 95% Confidence intervals (CI): 64.2-70.1) than users of private doctors (55.7%, 95%CI: 52.5-58.6) and public institutions (SS 53.8%, 95%CI: 51.6-55.9); MoH 44.7%, 95%CI: 42.5-47.0). The probability of spending on consultations (88%, 95%CI: 86-89) and on medicines (97%, 95%CI: 96-98) was much higher for DAPPs users when compared to SS (2%, 95%CI: 2-3

1  
2  
3 and 12%, 95%CI: 11-14, respectively) and MoH users (11%, 95%CI: 9-12 and  
4  
5  
6 32%, 95%CI:30-34, respectively).

7  
8 **Conclusions:** DAPPs counteract current financial protection policies since a  
9  
10 significant percentage of its users were affiliated with a public institution, reported  
11  
12 higher OOP spending and higher number of medicines prescribed than users of  
13  
14 other providers. The overprescription should prompt studies to learn about DAPPs'  
15  
16 quality of care, which may arise from the conflict of interest implicit in the linkage of  
17  
18 prescribing and dispensing processes.  
19  
20  
21  
22  
23  
24  
25  
26  
27  
28  
29  
30  
31  
32  
33  
34  
35  
36  
37  
38  
39  
40  
41  
42  
43  
44  
45  
46  
47  
48  
49  
50  
51  
52  
53  
54  
55  
56  
57  
58  
59  
60

## STRENGTHS AND LIMITATIONS OF THIS STUDY

- This study is the first that uses nationally representative household data to analyze the characteristics of users of doctors' offices adjacent to private pharmacies (DAPPs), their reasons to attend, perception of quality, and associated out-of-pocket expenditures, and runs a comparative analysis with users of other healthcare services.
- This study identified that users of DAPPs: paid out-of-pocket for medical visits and medications, therefore counteracting financial protection policies, and received, on average, higher number of medicines prescribed than users of other healthcare institutions, thus signaling poorer quality of care; For DAPPs medical doctors this situation might reflect a conflict of interest given that they work for the pharmacies.
- The main limitation is that this study is a secondary data analysis, thus with the available information it was not possible to evaluate in-depth the quality of care.



## BACKGROUND

In the past decade in Mexico, recognition of inequity in health, disparities in access and utilization of health services, and differences in resource allocation and health expenditures fuelled the implementation of the System for Social Protection of Health (SSPH). The SSPH aims at achieving universal healthcare coverage and financial protection for the population without Social Security. However, in 2010—8 years after its inception—the Mexican total health expenditure accounted for only 6.2% of the gross domestic product [1] from which more than half (51.7%) is financed through out-of-pocket expenditures. Among OECD countries, Mexico's income inequality is the highest. [2]

The complexity of the Mexican healthcare system challenges the success of health policies because the healthcare sector comprises segmented public and private healthcare systems with little interaction. The public sector covers an estimated 78.6% of Mexico's population (~112 million). All formal labour market and government employees receive healthcare from the Social Security institutions (SS), whereas most of the unemployed or self-employed population receives healthcare from the Ministry of Health (MoH), which comprises each of the 32 decentralized MoH facilities in every Mexican state. The private sector provides care for the uninsured population and for up to 31% of those insured who choose to use this system for ambulatory care.

Reaching universal coverage is expected to improve access and protect the population from the financial burden of healthcare. To accomplish these endeavours, the SSPH, which is a non-contributory social health insurance

1  
2  
3 program, includes access to ambulatory and hospital healthcare in public  
4 institutions and provision of no-cost prescribed medications at the point of care.  
5  
6 This represents actual financial protection, particularly for low-income groups. [3]  
7  
8 SSPH was launched in 2002. By 2011, the program reached 52.6 million affiliates  
9  
10 and the benefit package increased from 91 to 284 interventions. This package  
11  
12 covers the treatment of ~95% of the causes of visits in primary care clinics and  
13  
14 admissions to general hospitals [4]. During the same period, the proportion of  
15  
16 patients reporting complete provision of medications at the MoH facilities increased  
17  
18 from 55% to 62%, whereas in the SS the increase was from 70% to 87%. [4]  
19  
20  
21 Despite the progress, Mexican policies on access to healthcare and, in particular,  
22  
23 to medications still stand at a crossroad and deserve careful analysis. The  
24  
25 availability of medicines is a key determinant of access to and utilization of health  
26  
27 services. In Mexico, most medications are being paid for with private resources  
28  
29 (mostly out-of-pocket) despite the important public investment in healthcare. A  
30  
31 recent report has emphasized that for every Mx\$100 spent on medications, Mx\$79  
32  
33 is being paid with private resources and only Mx\$21 with public funds. [5]  
34  
35 Furthermore, in 2010 the Mexican authorities enacted a prescription-only  
36  
37 requirement policy to enforce the regulation to sell antibiotics only with a  
38  
39 **physician's prescription**. This policy, aimed at mitigating self-medication, had the  
40  
41 unintended consequence of boosting private ambulatory healthcare in the form of  
42  
43 doctor's offices adjacent to private pharmacies (DAPPs). [6]  
44  
45  
46  
47  
48  
49  
50  
51  
52  
53  
54  
55  
56  
57  
58  
59  
60  
60 Indeed, since a decade ago, a small number of DAPPs began to operate in some  
61  
62 low-cost pharmacy chains but soon after the publication of the antibiotics' policy, a  
63  
64 growing number of DAPPs have been observed nationwide. **Currently, there are**

1  
2  
3 10,000 DAPPs in the country that provide 250,000 medical visits every day. [7]  
4  
5

6 This emergent phenomenon questions the success of current health policies  
7 focused on universal coverage for healthcare and signals the unbalance of the  
8 supply and demand for ambulatory healthcare and medicines in the public sector.  
9  
10 Furthermore, DAPPs challenges current regulations and norms for doctors' offices  
11 and private pharmacies.  
12  
13

14  
15 The policies to improve access to medicines and safe prescriptions face multiple  
16 challenges such as the conflict of interest and may have unanticipated results. Until  
17 recently, in Japan and United States, [8] Korea [9] and China [10, 11] among other  
18 countries, [12] medical doctors and pharmacists were allowed to prescribe and  
19 dispense medicines. Such practices contributed to high medicine utilization; for  
20  
21

22  
23  
24  
25  
26  
27  
28  
29  
30  
31  
32  
33  
34  
35  
36  
37  
38  
39  
40  
41  
42  
43  
44  
45  
46  
47  
48  
49  
50  
51  
52  
53  
54  
55  
56  
57  
58  
59  
60  
for example, in China almost 50% of the revenues of medical doctors and pharmacists  
came from pharmaceuticals. [10] Due to the financial incentive, more medicines

were dispensed and their selection was influenced by factors other than their  
quality or cost-effectiveness. The recognition of this problem encouraged the  
introduction of reforms aimed at separating medicine prescribing and dispensing.

In some countries this strategy decreased the irrational use of medicines [13]  
although in other countries it provoked the practice that health providers hired  
onsite pharmacists. [14] Because the provider paid a salary to the pharmacists, the  
provider's incentives and irrational prescription patterns remained unchanged.

In Mexico, expansion of DAPPs indicates that prescribing and dispensing of  
medicines are related instead of being separated as the international experience  
suggests. To better understand this situation, the objectives of this study were to  
compare DAPPs users with users of other services in terms of their characteristics,

1  
2  
3 reasons for attending specific services, perception of quality, and associated out-  
4  
5 of-pocket expenditures.  
6  
7

## 8 9 10 **METHODS**

### 11 **Data source**

12  
13 This study is a secondary data analysis of the 2012 National Survey of Health and  
14  
15 Nutrition (ENSANUT 2012). [15] ENSANUT is a complex survey, which is  
16  
17 representative at the national, state and urban-rural stratum levels. It was designed  
18  
19 to collect data on different health and nutrition conditions and the utilization of  
20  
21 ambulatory and hospital care services. ENSANUT 2012 was applied to 194,923  
22  
23 individuals in 50,528 households (response rate of 87%). It was sampled through a  
24  
25 probabilistic multistage process. The specific details on the sampling approach of  
26  
27 ENSANUT 2012 are published elsewhere. [15]  
28  
29

30  
31 To collect the information for the ENSANUT survey, previously trained interviewers  
32  
33 carried out direct, structured face-to-face interviews with key household informants  
34  
35 and health services users. The interviewers applied the 5-questionnaire set that  
36  
37 ENSANUT 2000 and 2006 used: household, health services use, children,  
38  
39 adolescents and adults  
40  
41  
42  
43  
44

### 45 **Study population, variables and statistical analysis**

46  
47 The present study analyzed the information from the household and health  
48  
49 services use questionnaires of ENSANUT 2012. Figure 1 depicts selection of the  
50  
51 study population.  
52  
53

54  
55 **[Figure 1. Selection of study population goes here]**  
56  
57  
58  
59  
60

Figure 1. Selection of study population

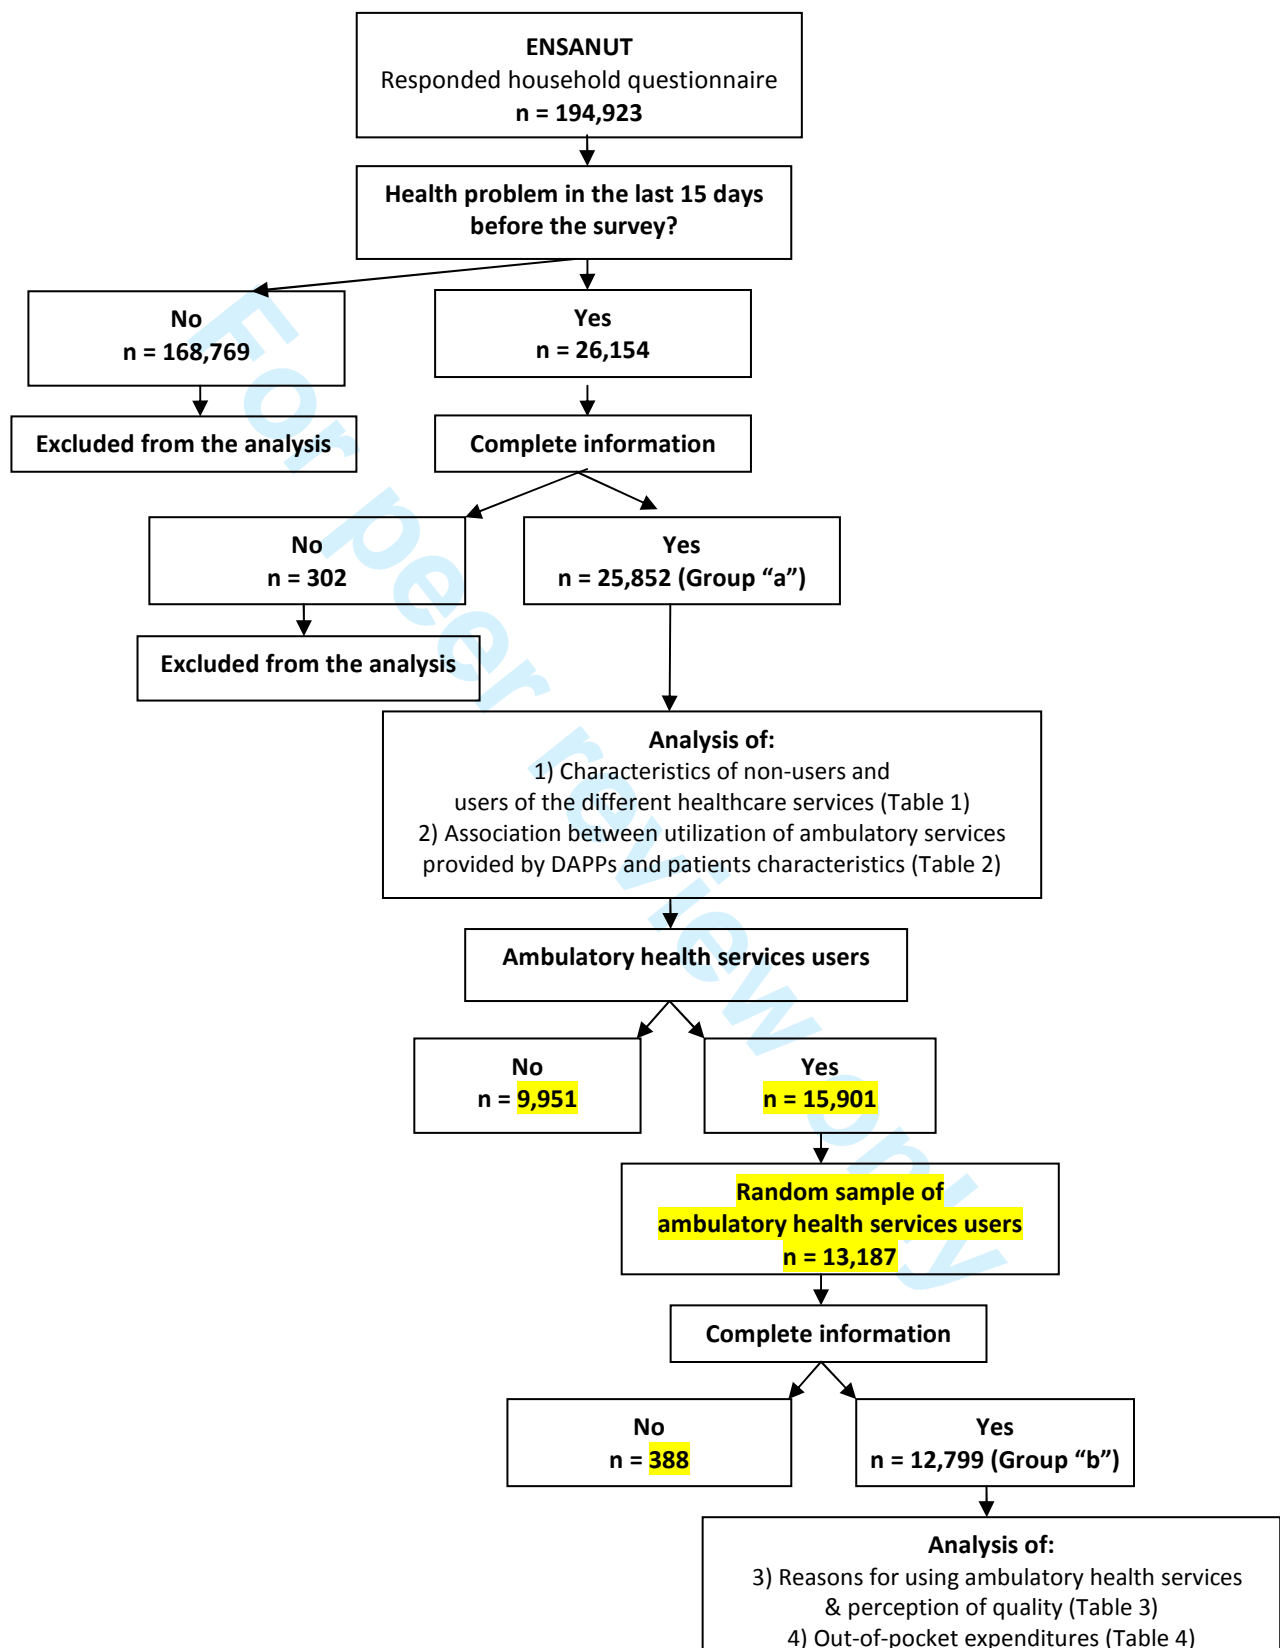

1  
2  
3  
4  
5  
6 The study population comprised: a) individuals identified as having had a health  
7  
8 problem within 15 days before the survey according to the household questionnaire  
9  
10 and b) a random sample of ambulatory health services users who answered the  
11  
12 health services use questionnaire [14]. The number of individuals who had a health  
13  
14 problem was obtained as follows: from the total number of survey participants  
15  
16 (194,923 individuals), 26,154 (13.4%) reported having a health problem; after  
17  
18 excluding the questionnaires with incomplete information, the final sample was  
19  
20 25,852 individuals. Thus, the non-response rate was 1.2%. Following the same  
21  
22 logic, 13,187 health services users were chosen; 12,799 had complete information  
23  
24 and 388 (2.9%) did not.  
25  
26  
27  
28

29 In group “a” we identified five categories of users of healthcare services: 1) doctors’  
30  
31 offices adjacent to private pharmacies (DAPPs), 2) SS facilities, 3) MoH facilities,  
32  
33 4) offices of private doctors independent from pharmacies, and 5) non-users or  
34  
35 those who reported consulting with a friend, neighbour, family member,  
36  
37 homeopaths or other healers. This was the dependent variable.  
38  
39  
40

41 Data analysis was performed in two stages. In the first stage, the sample “a”  
42  
43 served to describe the sociodemographic characteristics and identify the factors  
44  
45 associated with the use of DAPPs in comparison to the use of other health services  
46  
47 or no use. The analysis included the following independent variables that the  
48  
49 literature suggests as related to the use of health services: [16-18] sex (male or  
50  
51 female), age group (0-9 years, 10-19 years, 20-64 years and  $\geq 65$  years), and years  
52  
53 of schooling (0, 1-6, 7-9, and  $\geq 10$ ). The variable of years of schooling was obtained  
54  
55 directly from the interview data for subjects 15 years of age and older, and for  
56  
57  
58  
59  
60

1  
2  
3 individuals younger than 15 years the mean of years of schooling of the household  
4  
5 members was used. Other analyzed variables were place of residence (rural,  
6  
7 urban or metropolitan); ethnicity of the head of household; [19] degree of  
8  
9 marginalization (very low/low, middle, high/very high) following the 2010  
10  
11 marginalization index (based on access to basic infrastructure services, housing  
12  
13 conditions, education attainment, and wage earnings) at locality level [20]; type of  
14  
15 medical insurance (SS, SSPH, private or none); and socioeconomic status (SES).  
16  
17 The SES was determined classifying the population in quintiles; the information to  
18  
19 ascertain the SES included possession of different assets, services and  
20  
21 characteristics of the household infrastructure. [21, 22] The SES index was  
22  
23 constructed using a principal components analysis with polychoric correlation  
24  
25 matrices. Additionally, type of health problem (acute, chronic or other) and  
26  
27 perception of severity (mild or moderate/severe) of health problem were analyzed.  
28  
29 The factors associated with the use of a specific healthcare provider were modeled  
30  
31 using a multinomial logistic regression [23] in which the dependent variable  
32  
33 included the five categories of health services users described before. The non-  
34  
35 users, which represented 38.5% of the sample, were used as the reference  
36  
37 category. In addition to the sociodemographic characteristics, the model was  
38  
39 adjusted for the geographic region of state of residence (Northwest, Northeast,  
40  
41 Central-North, East, West, Central-South, Southwest, Southeast). The results were  
42  
43 reported in odds ratios (OR). The hypothesis tests on the OR estimated were  
44  
45 performed at 1, 5 and 10% confidence levels. We report various statistical  
46  
47 goodness of fit and reliability of the estimated models [Akaike criteria (AIC), log-  
48  
49 likelihood,  $LR-\chi^2$ , and  $R^2$ -McFadden].  
50  
51  
52  
53  
54  
55  
56  
57  
58  
59  
60

1  
2  
3 The second stage of the analysis focused on sample “b” of health services users.  
4  
5 Participants in this part of the survey were asked about the characteristics of the  
6  
7 healthcare received and their perceptions of the quality of care. The descriptive  
8  
9 analysis comprised the main reasons for using specific healthcare services, the  
10  
11 percentage of users who received information about their diagnosis, number of  
12  
13 prescribed medicines (0, 1, 2, or 3 or more), percentage of users who received and  
14  
15 understood the information about prescribed medicines, perception regarding the  
16  
17 quality of care received, willingness to return to the same healthcare institution in  
18  
19 the future, and reasons for dissatisfaction with health care (e.g., lack of  
20  
21 improvement in health, high costs, remote services, long waiting time). We also  
22  
23 analyzed out-of-pocket expenditures for transportation from home to healthcare  
24  
25 facilities, healthcare visits and medicines. The amount was reported in local  
26  
27 currency (Mexican pesos). To estimate the median and interquartile range (IQR) of  
28  
29 waiting time and out-of-pocket expenditures by type of health care provider, the  
30  
31 quantile regression model at the population level was utilized. All statistical  
32  
33 analyses were performed using the statistical package STATA 12.1.  
34  
35  
36  
37  
38  
39  
40  
41  
42

## 43 RESULTS

44  
45 Table 1 summarizes the characteristics of users of different healthcare services.  
46  
47 Overall, 61.5% of participants who were reported to have had a health problem  
48  
49 seek care with a health provider according to the following distribution: MoH  
50  
51 (20.9%), SS (16.1%), private providers (15.4%) and DAPPs (9.2%).  
52  
53  
54  
55  
56  
57  
58  
59  
60



**Table 1. Characteristics of users and non-users of the different healthcare services, Mexico 2012\***

|                                             | DAPPs                      | Social Security         | Ministry of Health      | Private doctors         | Non-users               |                                                          |
|---------------------------------------------|----------------------------|-------------------------|-------------------------|-------------------------|-------------------------|----------------------------------------------------------|
| Observations                                |                            |                         |                         |                         |                         |                                                          |
| Sample                                      | 2,387                      | 4,148                   | 5,390                   | 3,976                   | 9,951                   | <i>p-value corrected<br/>by survey design<br/>effect</i> |
| %                                           | 9.2                        | 16.1                    | 20.9                    | 15.4                    | 38.5                    |                                                          |
| Weighted                                    | 1,715,838                  | 2,775,195               | 2,709,387               | 2,884,34                | 5,967,254               |                                                          |
| %                                           | 10.7                       | 17.3                    | 16.9                    | 18.0                    | 37.2                    |                                                          |
|                                             | <i>Estimation [95% CI]</i> |                         |                         |                         |                         |                                                          |
| <b>Male (vs. female)</b>                    | <b>44.7 [42.0,47.5]</b>    | <b>41.0 [39.0,43.0]</b> | <b>40.3 [38.6,42.2]</b> | <b>45.0 [42.8,47.2]</b> | <b>46.4 [45.1,47.7]</b> | <b>0.00</b>                                              |
| Years of age                                |                            |                         |                         |                         |                         |                                                          |
| 0-9                                         | 35.3 [32.3,38.4]           | 18.2 [16.5,20.1]        | 29.1 [27.3,31.0]        | 30.6 [28.6,32.7]        | 19.6 [18.5,20.8]        | 0.00                                                     |
| 10-19                                       | 16.5 [14.5,18.7]           | 9.2 [8.1,10.5]          | 13.7 [12.5,15.0]        | 11.9 [10.7,13.2]        | 16.4 [15.5,17.4]        |                                                          |
| 20-64                                       | 43.5 [40.6,46.5]           | 56.4 [54.2,58.7]        | 46.8 [45.0,48.6]        | 48.0 [45.9,50.1]        | 56.0 [54.6,57.4]        |                                                          |
| ≥65                                         | 4.8 [3.6,6.2]              | 16.1 [14.4,17.9]        | 10.4 [9.3,11.7]         | 9.5 [8.4,10.7]          | 8.0 [7.2,8.8]           |                                                          |
| Years of schooling                          |                            |                         |                         |                         |                         |                                                          |
| 0                                           | 3.8 [2.9,4.9]              | 7.1 [6.1,8.3]           | 11.1 [10.0,12.4]        | 6.5 [5.6,7.5]           | 8.1 [7.4,8.9]           | 0.00                                                     |
| 1-6                                         | 46.2 [43.0,49.4]           | 36.9 [34.5,39.4]        | 54.1 [52.0,56.3]        | 36.3 [34.0,38.7]        | 42.7 [41.0,44.4]        |                                                          |
| 7-9                                         | 28.8 [26.1,31.7]           | 25.6 [23.5,27.8]        | 22.0 [20.2,23.8]        | 25.5 [23.7,27.4]        | 25.6 [24.3,26.8]        |                                                          |
| ≥10                                         | 21.3 [18.7,24.1]           | 30.4 [28.3,32.5]        | 12.8 [11.4,14.4]        | 31.7 [29.3,34.2]        | 23.6 [22.1,25.2]        |                                                          |
| Rural residence (vs. Urban or metropolitan) | 10.6 [8.9,12.5]            | 9.5 [8.0,11.2]          | 39.0 [36.3,41.7]        | 18.1 [16.4,20.0]        | 24.0 [22.2,25.8]        | 0.00                                                     |
| Locality deprivation level                  |                            |                         |                         |                         |                         |                                                          |
| Very low/low                                | 81.2 [78.3,83.8]           | 85.8 [83.8,87.7]        | 50.2 [47.0,53.4]        | 72.8 [70.2,75.3]        | 65.1 [62.5,67.6]        | 0.00                                                     |
| Middle                                      | 9.7 [7.7,12.1]             | 8.0 [6.4,9.8]           | 13.8 [11.8,16.2]        | 11.4 [9.5,13.8]         | 11.7 [9.8,13.9]         |                                                          |
| High/very high                              | 9.1 [7.3,11.3]             | 6.2 [5.0,7.7]           | 36.0 [32.8,39.3]        | 15.7 [13.8,18.0]        | 23.3 [21.0,25.7]        |                                                          |
| Ethnicity: Indigenous                       | 2.9 [2.2,3.9]              | 3.5 [2.7,4.6]           | 11.9 [10.0,14.1]        | 6.2 [4.9,7.9]           | 8.8 [7.4,10.3]          | 0.00                                                     |
| Quintile of socioeconomic status            |                            |                         |                         |                         |                         |                                                          |
| 1 <sup>st</sup>                             | 8.3 [6.5,10.5]             | 4.1 [3.3,5.1]           | 24.5 [22.4,26.9]        | 8.1 [7.0,9.4]           | 16.7 [15.3,18.2]        | 0.00                                                     |
| 2 <sup>nd</sup>                             | 18.5 [15.9,21.5]           | 10.9 [9.6,12.3]         | 26.2 [24.3,28.2]        | 11.8 [10.4,13.4]        | 21.0 [19.4,22.6]        |                                                          |
| 3 <sup>rd</sup>                             | 22.4 [19.4,25.7]           | 19.3 [17.6,21.2]        | 20.1 [18.3,22.0]        | 15.7 [14.1,17.4]        | 20.3 [18.9,21.8]        |                                                          |
| 4 <sup>th</sup>                             | 26.3 [22.9,30.1]           | 25.6 [23.4,27.9]        | 16.8 [15.0,18.7]        | 24.7 [22.3,27.1]        | 19.4 [17.9,21.1]        |                                                          |
| 5 <sup>th</sup>                             | 24.5 [21.1,28.2]           | 40.1 [37.3,42.8]        | 12.5 [10.7,14.5]        | 39.8 [37.0,42.7]        | 22.5 [20.7,24.5]        |                                                          |
| Medical Insurance (MI)                      |                            |                         |                         |                         |                         |                                                          |
| Social Security                             | 29.5 [26.6,32.7]           | 94.3 [93.2,95.3]        | 6.8 [5.7,8.1]           | 39.1 [36.6,41.8]        | 31.5 [29.7,33.3]        | 0.00                                                     |
| SSPH                                        | 35.4 [32.1,38.8]           | 3.0 [2.3,3.8]           | 81.1 [79.3,82.9]        | 25.6 [23.6,27.8]        | 41.4 [39.6,43.1]        |                                                          |
| Private insurance                           | 0.0 [0.0,0.2]              | 0.1 [0.0,0.3]           | 0.0 [0.0,1.7]           | 1.0 [2.9,0.3]           | 0.1 [0.5,0.0]           |                                                          |
| No MI                                       | 35.1 [31.6,38.7]           | 2.6 [2.0,3.4]           | 12.1 [10.7,13.6]        | 33.5 [31.0,36.1]        | 26.9 [25.6,28.3]        |                                                          |
| Type of health problem                      |                            |                         |                         |                         |                         |                                                          |
| Acute health problems                       | 80.4 [77.7,83.0]           | 58.5 [56.3,60.6]        | 65.7 [63.7,67.7]        | 71.0 [68.9,73.1]        | 81.0 [79.7,82.3]        | 0.00                                                     |
| Chronic health problems                     | 14.1 [12.0,16.5]           | 29.8 [27.7,32.0]        | 24.3 [22.5,26.1]        | 20.1 [18.4,22.0]        | 10.2 [9.4,11.1]         |                                                          |
| Other health problems                       | 5.5 [4.3,7.0]              | 11.8 [10.4,13.3]        | 10.0 [8.9,11.3]         | 8.9 [7.8,10.1]          | 8.8 [8.0,9.6]           |                                                          |
| Perception of severity of health problem    |                            |                         |                         |                         |                         |                                                          |
| Mild                                        | 44.2 [41.1,47.4]           | 37.1 [34.9,39.4]        | 40.4 [38.3,42.5]        | 36.2 [34.0,38.5]        | 63.6 [61.9,65.2]        | 0.00                                                     |
| Moderate/severe                             | 55.8 [52.6,58.9]           | 62.9 [60.6,65.1]        | 59.6 [57.5,61.7]        | 63.8 [61.5,66.0]        | 36.4 [34.8,38.1]        |                                                          |

Difference estimates performed considering the effect of the survey design.

1 The variable of years of schooling was obtained directly from the interview data for subjects 15 years of age and older, and for individuals younger than 15 years the mean of years of schooling of the household members was used.

1  
2  
3  
4  
5 When the sample was stratified by insurance coverage, the results showed that a  
6  
7 significant percentage of users with SS or SSPH insurance attended private  
8  
9 services or DAPPs. Among DAPPs users, 30% and 35% reported as having SS or  
10  
11 SSPH coverage, respectively. Similarly, among private physician users, 39% had  
12  
13 SS and 26% had SSPH coverage.  
14  
15

16  
17 DAPPs users were economically better off than those who went to MoH facilities.  
18  
19 In comparison to the users of other health services and non-users, DAPPs users  
20  
21 were younger (51% were between 0 and 19 years old), with higher educational  
22  
23 level than MoH users and lower educational level than SS users. Most DAPPs  
24  
25 users lived in urban and metropolitan areas with a low level of deprivation (89% for  
26  
27 the former and 81% for the latter), whereas only 61% of MoH users lived in these  
28  
29 areas and 50% had low level of deprivation. 3% of DAPPs users were indigenous  
30  
31 vs. 12% of indigenous users receiving care from the MoH. DAPPs users were  
32  
33 equally distributed among the different socioeconomic levels. This is in contrast  
34  
35 with MoH users who were concentrated according to the poorest quintiles, whereas  
36  
37 SS and private services users were in the richest quintiles. Furthermore, acute  
38  
39 health problems encouraged more frequent attendance to DAPPs (80%) in  
40  
41 comparison with other groups. The users sought healthcare in the institutions in  
42  
43 which they were affiliated if they perceived that the problem was moderate to  
44  
45 severe.  
46  
47  
48  
49  
50

51  
52 Table 2 shows the multinomial model that confirms that users of DAPPs were  
53  
54 younger, mostly from urban and metropolitan areas and presented an acute  
55  
56  
57  
58  
59  
60

condition. Furthermore, those with SSPH insurance were more likely to visit DAPPs than private clinics.

**Table 2. Multinomial model of the association between utilization of services provided by DAPPs and patient characteristics, Mexico 2012**

|                                                          | Reference category: Non- users<br>Odds ratios (95% CI) reported |                             |                          |                          |
|----------------------------------------------------------|-----------------------------------------------------------------|-----------------------------|--------------------------|--------------------------|
|                                                          | DAPPs                                                           | Social Security             | Ministry of Health       | Private doctors          |
| Sex (Ref.: female)                                       |                                                                 |                             |                          |                          |
| Male                                                     | 0.863**<br>[0.786,0.947]                                        | 0.872**<br>[0.798,0.952]    | 0.798**<br>[0.742,0.859] | 0.920*<br>[0.850,0.996]  |
| Years of age (Ref.: ≥65)                                 |                                                                 |                             |                          |                          |
| ≤9                                                       | 3.739**<br>[2.986,4.683]                                        | 1.320**<br>[1.114,1.562]    | 2.061**<br>[1.771,2.398] | 2.264**<br>[1.932,2.654] |
| 10-19                                                    | 1.761**<br>[1.388,2.235]                                        | 0.623**<br>[0.514,0.754]    | 1.104<br>[0.939,1.298]   | 0.676**<br>[0.566,0.808] |
| 20-64                                                    | 1.249*<br>[1.008,1.547]                                         | 0.769**<br>[0.665,0.890]    | 0.880+<br>[0.770,1.006]  | 0.653**<br>[0.566,0.753] |
| Years of schooling (Ref.: 0 years)                       |                                                                 |                             |                          |                          |
| 1-6                                                      | 1.236+<br>[0.981,1.558]                                         | 1.067<br>[0.887,1.282]      | 1.051<br>[0.921,1.200]   | 0.917<br>[0.780,1.078]   |
| 7-9                                                      | 1.334*<br>[1.046,1.702]                                         | 1.069<br>[0.875,1.307]      | 1.050<br>[0.904,1.221]   | 1.264**<br>[1.059,1.509] |
| ≥10                                                      | 1.309*<br>[1.017,1.685]                                         | 1.054<br>[0.860,1.291]      | 1.057<br>[0.891,1.253]   | 1.581**<br>[1.316,1.898] |
| Place of residence (Ref.: urban or metropolitan)         |                                                                 |                             |                          |                          |
| Rural                                                    | 0.637**<br>[0.552,0.736]                                        | 0.838*<br>[0.732,0.959]     | 1.358**<br>[1.234,1.494] | 1.025<br>[0.918,1.145]   |
| Locality deprivation level (Ref.: low, very low level)   |                                                                 |                             |                          |                          |
| Middle                                                   | 0.818**<br>[0.703,0.952]                                        | 1.084<br>[0.936,1.256]      | 1.051<br>[0.936,1.180]   | 1.421**<br>[1.254,1.611] |
| High, very high                                          | 0.551**<br>[0.464,0.655]                                        | 0.858+<br>[0.720,1.022]     | 0.978<br>[0.869,1.102]   | 1.278**<br>[1.116,1.464] |
| Ethnicity (Ref.:non-indigenous)                          |                                                                 |                             |                          |                          |
| Indigenous                                               | 0.647**<br>[0.519,0.806]                                        | 0.959<br>[0.782,1.175]      | 1.171**<br>[1.039,1.319] | 1.014<br>[0.870,1.182]   |
| Quintile of socioeconomic status (Ref.: 5th)             |                                                                 |                             |                          |                          |
| 1st                                                      | 0.497**<br>[0.406,0.608]                                        | 0.669**<br>[0.546,0.818]    | 1.120<br>[0.957,1.311]   | 0.224**<br>[0.189,0.264] |
| 2nd                                                      | 0.834*<br>[0.712,0.977]                                         | 0.886<br>[0.764,1.028]      | 1.176*<br>[1.016,1.361]  | 0.345**<br>[0.301,0.396] |
| 3rd                                                      | 0.949<br>[0.819,1.100]                                          | 0.966<br>[0.846,1.103]      | 1.088<br>[0.940,1.258]   | 0.462**<br>[0.408,0.524] |
| 4th                                                      | 1.080<br>[0.936,1.246]                                          | 1.034<br>[0.915,1.169]      | 1.157+<br>[0.996,1.343]  | 0.711**<br>[0.633,0.799] |
| Medical insurance (Ref.: no insurance)                   |                                                                 |                             |                          |                          |
| Social Security                                          | 0.676**<br>[0.597,0.765]                                        | 27.495**<br>[22.495,33.607] | 0.514**<br>[0.440,0.599] | 0.871**<br>[0.785,0.966] |
| SSPH                                                     | 0.769**<br>[0.686,0.862]                                        | 0.802+<br>[0.625,1.029]     | 3.822**<br>[3.444,4.241] | 0.596**<br>[0.539,0.659] |
| Type of health problem (Ref.: chronic health problems)   |                                                                 |                             |                          |                          |
| Acute                                                    | 0.730**<br>[0.630,0.847]                                        | 0.298**<br>[0.264,0.336]    | 0.364**<br>[0.327,0.405] | 0.425**<br>[0.380,0.476] |
| Other                                                    | 0.566**<br>[0.451,0.710]                                        | 0.502**<br>[0.424,0.595]    | 0.435**<br>[0.376,0.504] | 0.530**<br>[0.451,0.623] |
| Perception of health problem (Ref.: mild health problem) |                                                                 |                             |                          |                          |
| Moderate/severe                                          | 2.336**<br>[2.123,2.571]                                        | 2.663**<br>[2.430,2.918]    | 2.192**<br>[2.032,2.364] | 3.044**<br>[2.802,3.307] |
| Observations                                             |                                                                 |                             |                          | 25,620                   |
| AIC                                                      |                                                                 |                             |                          | 61,461                   |
| Log likelihood                                           |                                                                 |                             |                          | -30,618                  |
| LR $\chi^2$                                              |                                                                 |                             |                          | 15,399                   |
| Prob > $\chi^2$                                          |                                                                 |                             |                          | 0.000                    |
| McFadden R <sup>2</sup>                                  |                                                                 |                             |                          | 0.201                    |

Note: Persons with private medical insurance were excluded.

\*\*p<0.01,\*p<0.05;+p<0.10.

1  
2  
3  
4  
5  
6 The reasons for using specific health services and perception of quality of care are  
7  
8 presented in Table 3. The top three reasons for using DAPPs were that these  
9  
10 services were inexpensive, conveniently located and had a short waiting time;  
11  
12 whereas the main reason to use SS and MoH services was to have an affiliation  
13  
14 with such institutions. Users of private doctors mentioned more often (29%) that  
15  
16 they knew the doctor and liked the care provided as the main reasons for attending  
17  
18 the private doctor's office.  
19  
20

21  
22 Regarding the average number of medicines per encounter, DAPPs users received  
23  
24  $\geq 3$  medicines more often (67%) than users of private doctors (56%) and public  
25  
26 institutions (SS 54%; MoH 45%). A higher percentage of DAPPs and private  
27  
28 practice users received information about the diagnosis and prescribed medicines  
29  
30 than those of public institutions. DAPPs users also had better perception of the  
31  
32 quality of healthcare (good/very good quality: DAPPs 89%, private doctor 93%)  
33  
34 than other users (SS 78%; MoH 83%) and would return to the same healthcare  
35  
36 provider. The main reason for not returning to DAPPs was lack of health  
37  
38 improvement. For the SS and MoH, the reasons for not returning were long waiting  
39  
40 time, inconsiderate healthcare providers and incomplete provision of prescribed  
41  
42 medicines.  
43  
44  
45  
46  
47  
48  
49  
50  
51  
52  
53  
54  
55  
56  
57  
58  
59  
60

**Table 3. Reasons for using ambulatory health services of different providers and perception of quality, Mexico 2012\***

|                                                                      | DAPPs            | Social Security  | Ministry of Health | Private doctors  | <i>p-value corrected by survey design effect</i> |
|----------------------------------------------------------------------|------------------|------------------|--------------------|------------------|--------------------------------------------------|
| Observations                                                         |                  |                  |                    |                  |                                                  |
| Sample                                                               | 1,778            | 3,840            | 4,569              | 2,612            |                                                  |
| %                                                                    | 13.89            | 30               | 35.7               | 20.41            |                                                  |
| Weighted                                                             | 1,504,746        | 2,912,390        | 2,602,144          | 2,128,578        |                                                  |
| %                                                                    | 16.45            | 31.84            | 28.45              | 23.27            |                                                  |
| <i>Estimation [95% CI]</i>                                           |                  |                  |                    |                  |                                                  |
| Main reasons for using specific healthcare services                  |                  |                  |                    |                  |                                                  |
| Having insurance                                                     | 1.5 [0.7,2.2]    | 88.5 [86.8,90.2] | 59.4 [57.0,61.8]   | 2.7 [1.9,3.6]    | 0.00                                             |
| Convenient to home                                                   | 32.5 [29.1,36.0] | 6.3 [5.1,7.4]    | 25.2 [23.3,27.2]   | 16.6 [14.4,18.8] | 0.06                                             |
| Inexpensive                                                          | 33.6 [30.0,37.2] | 10.2 [8.6,11.9]  | 22.1 [20.2,24.0]   | 4.7 [3.7,5.8]    | 0.00                                             |
| Familiar with the doctor                                             | 8.1 [5.5,10.7]   | 2.1 [1.4,2.7]    | 2.7 [1.8,3.6]      | 29.1 [26.2,31.9] | 0.00                                             |
| User likes care provided                                             | 16.0 [12.9,19.1] | 6.0 [5.0,7.1]    | 8.2 [7.1,9.4]      | 28.2 [25.7,30.8] | 0.00                                             |
| Short waiting time                                                   | 26.5 [23.5,29.6] | 2.3 [1.6,3.0]    | 2.8 [2.1,3.4]      | 22.1 [19.7,24.5] | 0.68                                             |
| Other                                                                | 18.7 [16.0,21.4] | 4.8 [3.7,5.9]    | 10.2 [8.7,11.8]    | 24.2 [21.6,26.7] | 0.00                                             |
| Quality of health care                                               |                  |                  |                    |                  |                                                  |
| Number of prescribed medicines                                       |                  |                  |                    |                  |                                                  |
| 0                                                                    | 1.6 [0.9,2.8]    | 10.3 [9.0,11.8]  | 11.1 [9.8,12.5]    | 5.4 [4.2,6.8]    | 0.00                                             |
| 1                                                                    | 8.3 [6.7,10.3]   | 10.7 [9.4,12.3]  | 12.0 [10.8,13.3]   | 9.9 [8.3,11.6]   |                                                  |
| 2                                                                    | 22.9 [20.3,25.7] | 25.2 [23.2,27.3] | 32.2 [30.2,34.3]   | 29.1 [26.7,31.6] |                                                  |
| ≥3                                                                   | 67.2 [64.2,70.1] | 53.8 [51.6,55.9] | 44.7 [42.5,47.0]   | 55.7 [52.8,58.6] |                                                  |
| % of users who received information about their diagnosis            | 90.3 [87.8,92.3] | 84.3 [82.5,85.9] | 84.5 [82.9,85.9]   | 92.7 [90.9,94.1] | 0.00                                             |
| % of users who received information about prescribed medications     | 92.3 [90.0,94.0] | 85.5 [83.8,87.0] | 86.8 [85.3,88.2]   | 93.7 [92.1,95.0] | 0.00                                             |
| Perception about the quality of health care services                 |                  |                  |                    |                  |                                                  |
| Good/Very good                                                       | 88.8 [86.4,90.8] | 77.7 [75.5,79.7] | 83.1 [81.4,84.7]   | 93.2 [91.5,94.5] | 0.00                                             |
| Regular                                                              | 10.2 [8.2,12.5]  | 16.7 [14.9,18.6] | 13.4 [12.0,14.9]   | 5.7 [4.6,7.1]    |                                                  |
| Bad/very bad                                                         | 1.1 [0.6,1.9]    | 5.7 [4.6,7.0]    | 3.5 [2.8,4.5]      | 1.1 [0.5,2.4]    |                                                  |
| Users who will return to the same place for healthcare               | 90.1 [87.3,92.4] | 81.8 [79.8,83.7] | 87.7 [86.1,89.1]   | 93.4 [91.8,94.7] | 0.00                                             |
| Reasons for not returning                                            |                  |                  |                    |                  |                                                  |
| Inconsiderate healthcare providers                                   | 4.7 [2.3,9.7]    | 32.0 [27.1,37.3] | 25.4 [20.0,31.7]   | 9.1 [3.9,19.8]   | 0.00                                             |
| Disagree with the diagnosis or treatment                             | 16.4 [10.4,25.0] | 18.9 [14.6,24.1] | 15.7 [12.1,20.1]   | 23.7 [14.6,36.1] | 0.44                                             |
| Lack of health improvement                                           | 27.9 [17.1,41.9] | 18.7 [14.6,23.8] | 16.9 [12.6,22.3]   | 32.0 [21.5,44.6] | 0.03                                             |
| High cost of healthcare services                                     | 9.8 [4.4,20.5]   | 0.5 [0.1,1.6]    | 1.4 [0.7,2.6]      | 19.7 [11.3,32.2] | 0.00                                             |
| Failure to provide or incomplete provision of prescribed medications | 3.3 [1.2,8.6]    | 20.6 [16.1,25.9] | 20.8 [16.0,26.5]   | 0.2 [0.0,1.3]    | 0.00                                             |
| Failure to provide information about the health problem & treatment  | 11.4 [5.9,21.1]  | 14.0 [10.8,18.0] | 8.6 [5.1,14.1]     | 4.0 [1.9,8.1]    | 0.04                                             |
| Long waiting time                                                    | 2.4 [0.8,7.1]    | 40.5 [34.6,46.7] | 31.7 [25.9,38.1]   | 2.2 [0.8,6.2]    | 0.00                                             |
| Other reasons                                                        | 5.3 [2.6,10.6]   | 11.1 [7.9,15.3]  | 8.4 [5.8,12.2]     | 2.3 [0.9,6.0]    | 0.01                                             |
| Waiting time (in minutes) Median of [IQR]**                          | 10.0 [5.0-25.0]  | 30.0 [15.0,90.0] | 60.0 [15.0,120]    | 10.0 [5.0,30.0]  | 0.00                                             |

\*Difference estimates performed considering the effect of the survey design.

\*\*p value estimated from quantile regression models.

1  
2  
3  
4  
5  
6  
7  
8  
9  
10  
11  
12  
13  
14  
15  
16  
17  
18  
19  
20  
21  
22  
23  
24  
25  
26  
27  
28  
29  
30  
31  
32  
33  
34  
35  
36  
37  
38  
39  
40  
41  
42  
43  
44  
45  
46  
47  
48  
49

Table 4 shows out-of-pocket expenditures for attending ambulatory care. DAPPs and MoH users were less likely to pay for transportation (41% and 39%) than SS and private doctors' users (58% and 51%). Also, DAPPs users spent less on transportation (MXN25.00) when compared to other users. The probability of spending on consultations (88% and 87%) and on medicines (97% and 89%) was much higher for DAPPs and private clinic users when compared to other users; the lowest probability was for users affiliated with the SS (2% and 12% respectively). DAPPs users spent less on consultation and medicines (average cost of consultation was Mx\$30; average cost of medicines was Mx\$200) than private doctors' users (consultation Mx\$200, medicines MX\$350).

**Table 4. Out-of-pocket expenditures to attend ambulatory healthcare, Mexico 2012**

|                                                  | Transportation expenditures |                                  | Medical visit expenditures |                                  | Medicine expenditures |                                  |
|--------------------------------------------------|-----------------------------|----------------------------------|----------------------------|----------------------------------|-----------------------|----------------------------------|
|                                                  | Probability [CI]            | Median [IQR]<br>Mexican currency | Probability [CI]           | Median [IQR]<br>Mexican currency | Probability [CI]      | Median [IQR]<br>Mexican currency |
| DAPPs users                                      | 0.41 [0.37,0.44]            | 25.0 [14.0,50.0]                 | 0.88 [0.86,0.90]           | 30.0 [25.0,35.0]                 | 0.97 [0.96,0.98]      | 200 [115.0,280.0]                |
| Social Security users                            | 0.58 [0.55,0.60]            | 28.0 [15.0,50.0]                 | 0.02 [0.02,0.03]           | 60.0 [40.0,125.0]                | 0.12 [0.11,0.14]      | 300.0 [120.0,740.0]              |
| Ministry of Health users                         | 0.39 [0.37,0.42]            | 30.0 [14.0,60.0]                 | 0.11 [0.09,0.12]           | 42.0 [20.0,85.0]                 | 0.32 [0.30,0.34]      | 200 [79.0,400.0]                 |
| Private medical doctor users                     | 0.51 [0.48,0.54]            | 50.0 [20.0,100.0]                | 0.87 [0.85,0.89]           | 200.0 [100.0,350.0]              | 0.89 [0.87,0.90]      | 350.0 [200.0,600.0]              |
| <i>p value corrected by survey design effect</i> | 0.941                       | 0.000                            | 0.000                      | 0.000                            | 0.000                 | 0.000                            |

Note: Weighted estimations; p value estimated from linear regression models for the probability reported and quantile regression models in the case of the median expenditure.

## DISCUSSION

The main results show that DAPPs resulted in being an important key player in the healthcare sector. The positive effect is the wide acceptance of the public to attend these services because it facilitates access to ambulatory care. However, DAPPs poses a series of challenges to reach the objectives of the current health policies: (i) users pay out-of-pocket for medical visits and medications, counteracting financial protection policies; (ii) the high rate of prescribed medications alarms potential flaws in the quality of care in these facilities, undermining the efforts to improve quality of care; (iii) represents a conflict of interest for healthcare providers given that the medical doctors work for the pharmacies, jeopardizing both financial protection and quality of care.

The public has demonstrated a favourable response for attending DAPPs facilities despite the fact that according to the authorities, almost 80% of the population is affiliated with a public medical insurance. [24] This is congruent with the finding in our study that 25% did not have medical insurance, and this proportion was higher among DAPP users.

The fact that two thirds of DAPP users have medical insurance can have different interpretations. The rapid increase of DAPPs indicates the magnitude of the gap of the public healthcare sector to fulfill the demand in urban and metropolitan areas. DAPP users were willing to pay because these services were apparently inexpensive, conveniently located and with immediate access; also, by attending DAPPs, users avoided long waiting times, inconsiderate healthcare providers and the incomplete provision of prescribed medicines with the public healthcare sector.

1  
2  
3 DAPPs promote inequity and out-of-pocket expenditures because its users pay for  
4 the medications and often for the visit. This undermines the potential gains of the  
5 public policy of financial protection. Between 2003 and 2010, the public health  
6 spending aimed at people without social security protection increased 81%,  
7 whereas the percentage of total health expenditures from out-of-pocket  
8 expenditures decreased by 3%, from 52% to 49%. This means that for every  
9 percentage point increase in public spending for persons without social security,  
10 there was a reduction of 0.04% in out-of-pocket spending. [25] This suggests that  
11 despite the increase in public resources for persons without social security, this  
12 has not yet reduced out-of-pocket expenditures, which is one of the main  
13 objectives of the financial reform. Our data shows that the probability of spending  
14 on medicine was higher for DAPP users than for users of other providers. Although  
15 the amount they spent is not as large as the out-of-pocket spending of users of  
16 private physicians, for those affiliated with a public institution it means additional  
17 financial burden. This could be a wake-up call to put into practice innovative and  
18 efficient patient-centered health service models focused on providing financial  
19 protection.

20  
21  
22 The presence of DAPPs in the health sector sends the signal that the Mexican  
23 regulation has a double standard for private doctors. **Current regulations of the**  
24 **Ministry of Health for private pharmacies literally forbid their “direct communication,**  
25 **through windows, doors or aisles, with other businesses, such as doctor’s offices**  
26 **[...]” [26].** The rapid expansion of DAPPs shows that this regulation is either  
27 imprecise or subject to interpretations, or there is weakness of the health authority  
28 to enforce it. This situation could be interpreted as an unspoken public policy of



laissez faire to deal with the dilemma of favoring access to healthcare vs. reinforcing the observance of the regulations.

Despite the fact that ENSANUT 2012 did not gather in-depth quality of care information, the results show that DAPPs users were prescribed an excessive number of medicines. Almost two thirds of users received, on average, three or more medications, despite the fact that most were young and sought ambulatory care for acute health problems, mainly mild acute respiratory illnesses (ARI). Globally, most incidences of inappropriate use of antibiotics occur in ARI. Given the large number of medicines prescribed in DAPPs consultations, it is likely that this may be derived from over-prescription of antibiotics. This requires in-depth analyses.

DAPPs represent a conflict of interest because the pharmacies hire the medical doctors to run the pharmacy-owned examining rooms and link the processes of prescription and sale of medications. According to Brody, "*conflicts of interest, whether individual or organizational, occur when one enters into arrangements that reasonably tempt one to put aside one's primary obligations (patients' safety) in favor of secondary interests, such as financial self-interest*". [27] The staff of DAPPs is being paid a salary plus commissions derived from the prescriptions. [28] This may encourage unjustified prescribing. This assumption is supported by studies from other countries where the merge of medicine prescribing and dispensing [14, 29] or exposure to information from pharmaceutical companies [30] affected prescription choices, prompting physicians to not necessarily act in the best interest of patients, resulting in higher prescribing frequency, higher costs, and lower prescribing quality. The high number of prescribed medications indicates that

1  
2  
3 medical doctors working for DAPPs may have financial incentives to prescribe  
4 certain products. The problem of overprescribing results in poly-pharmacy,  
5 increased out-of-pocket expenditures, increased risk of adverse medication  
6 reactions and, in the case of antibiotics, resistance. This complex situation  
7 jeopardizes the objectives of the policy to sell antibiotics only with a **physician's**  
8 **prescription**.

9  
10 The growing presence of DAPPs **contributes to the healthcare market failure in the**  
11 **Mexican context. The main health policies are focused on promoting a supplier-**  
12 **induced demand of public health sector services.** Although, **the quantity of**  
13 **ambulatory healthcare (medical visits and medications) demanded does not equate**  
14 **to the supply by the public health sector.** **A contributing factor is the asymmetry of**  
15 **information between consumers and providers, which is a feature of health markets**  
16 **and recognised as a cause of market failure. [31]** Patients are usually poorly  
17 informed consumers who fail to recognize high quality service; for example, in the  
18 present study, the interviewees attended DAPPs because it seemed to be  
19 convenient, rather than for the high quality of care offered. **Availability of**  
20 **Information about healthcare effectiveness and quality of the services is necessary**  
21 **for rational decision-making.** **It is advisable to collect data and provide to the**  
22 **consumers this type of information in order to enable them to make an informed**  
23 **choice to meet their own individual needs.**

24  
25 Apparently, the public sector has an unrecognized conflict between reinforcing the  
26 regulation, promoting high quality care and proper use of medications vs. allowing  
27 the growing supply of this type of ambulatory care providers to absorb the spill-over  
28 of the demand for consultations and medicines, regardless of the quality and cost.

1  
2  
3 Little attention is being paid to developing policies aimed at regulating and taking  
4 advantage of the role of the private market to enhance competition and improve  
5 the quality of healthcare. The findings support the assumption that is necessary to  
6 strengthen the stewardship of the MoH in the private sector, along with the urgent  
7 need to consolidate a national pharmaceutical policy.  
8  
9

10 The study has several limitations. It is a secondary data analysis of a cross-  
11 sectional study; thus, no longitudinal data are available to ascertain the changes of  
12 DAPPs services over time. Also, the available information did not allow in-depth  
13 evaluation of the quality of prescriptions. The information was gathered through  
14 interviews during home visits; therefore, the quality of the data depends on user  
15 recall. To mitigate this potential bias, the questions only addressed the prior 15-day  
16 period. Further and detailed information about the contracts and remunerations of  
17 DAPPs physicians is necessary in order to better evaluate the magnitude of the  
18 conflict of interest.  
19  
20  
21  
22  
23  
24  
25  
26  
27  
28  
29  
30  
31  
32  
33  
34  
35

## 36 CONCLUSION

37  
38 DAPPs have become an important player in Mexican healthcare, but they are an  
39 “elephant in the room.” This metaphor indicates an obvious truth that is either being  
40 ignored, or goes on unaddressed. As was mentioned earlier, DAPPs have been  
41 functioning for more than a decade; their number reach 10,000, providing 250,000  
42 medical visits every day. However, their functioning and regulation have been  
43 unaddressed by health policies. It was very recently (late 2013), that COFEPRIS  
44 (Spanish acronym for the Federal Commission for Protection against Sanitary  
45 Risks) issued “Guidelines for good practices” for pharmacies with doctor’s offices.  
46 These guidelines compile a list of current regulations for pharmacies, on the one  
47  
48  
49  
50  
51  
52  
53  
54  
55  
56  
57  
58  
59  
60

1  
2  
3 hand, and for ambulatory health services, on the other, but do not address the  
4  
5 central issues of preventing conflict of interest, or assessing quality of care. The  
6  
7 findings of this study support the notion that DAPPs counteract current financial  
8  
9 protection policies since a significant percentage of users were affiliated with a  
10  
11 public institution and reported higher out-of-pocket spending and higher number of  
12  
13 medicines prescribed than users of other providers. Additionally, these results  
14  
15 should prompt to learn more about the quality of care of DAPPs, which may arise  
16  
17 from the conflict of interest implicit in the linkage of prescribing and dispensing  
18  
19 processes. Addressing these aspects through rigorous studies can provide  
20  
21 evidence pertinent to improve the current pharmaceutical policies in Mexico.  
22  
23  
24  
25  
26  
27  
28  
29  
30  
31  
32  
33  
34  
35  
36  
37  
38  
39  
40  
41  
42  
43  
44  
45  
46  
47  
48  
49  
50  
51  
52  
53  
54  
55  
56  
57  
58  
59  
60

## CONTRIBUTORS

1  
2  
3  
4  
5  
6  
7  
8  
9  
10  
11  
12  
13  
14  
15  
16  
17  
18  
19  
20  
21  
22  
23  
24  
25  
26  
27  
28  
29  
30  
31  
32  
33  
34  
35  
36  
37  
38  
39  
40  
41  
42  
43  
44  
45  
46  
47  
48  
49  
50  
51  
52  
53  
54  
55  
56  
57  
58  
59  
60

RPC, MHA, SVD, VJW, AD conceptualized the study. SVD, AD conducted the literature review. RPC, SVD, ESM, VJW, MHA designed the study. ESM analysed the data. RPC, SVD, VJW, ESM, AD, MHA interpreted the data, wrote the manuscript and approved the final draft.

## FUNDING

This research received no specific grant from any funding agency in the public, commercial or not-for-profit sectors.

## COMPETING INTERESTS

There is no financial interest to disclose.

## ETHICS STATEMENT

This study is a secondary data analysis of the ENSANUT 2012. The data for the analysis were requested and obtained from the surveys public repository hosted at the National Institute of Public Health webpage at: <http://ensanut.insp.mx/>. This repository has the data already de-identified; thus it is not possible to trace any of the data to the actual individual. In accordance to the Internal Regulation of the Research Ethics Committee of the National Institute of Public Health, this secondary analysis was considered exempt of approval.

## REFERENCES

1. Organisation for Economic Co-operation and Development. OECD Health Data 2013: How Does Mexico Compare. Organisation for Economic Co-operation and Development, 2013. <http://www.oecd.org/mexico/Briefing-Note-MEXICO-2013.pdf>.
2. Organisation for Economic Co-operation and Development. An Overview of Growing Income Inequalities in OECD Countries: Main Findings. Organisation for Economic Co-operation and Development , 2011. <http://www.oecd.org/els/soc/49499779.pdf>.
3. Wirtz VJ, Reich MR, Leyva-Flores R, et al. Medicines in Mexico, 1990-2004: systematic review of research on access and use. *Salud Publica Mex* 2008;**50**:S470-S479.
4. Knaul FM, González-Pier E, Gómez-Dantés O, et. al. The quest for universal health coverage: achieving social protection for all in Mexico. *Lancet* 2012; **380**:1259-1279.
5. Fundación Mexicana para la Salud: Trabajando por la salud de la población. Propuestas de política para el sector farmacéutico. Versión para el diálogo. FUNSALUD, A.C., 2011. [http://www.funsalud.org.mx/eventos\\_2011/trabajando%20por%20la%20salud/Doc%20PolPubISFarm%20vFDigital%20060511.pdf](http://www.funsalud.org.mx/eventos_2011/trabajando%20por%20la%20salud/Doc%20PolPubISFarm%20vFDigital%20060511.pdf).

- 1  
2  
3  
4  
5  
6  
7  
8  
9  
10  
11  
12  
13  
14  
15  
16  
17  
18  
19  
20  
21  
22  
23  
24  
25  
26  
27  
28  
29  
30  
31  
32  
33  
34  
35  
36  
37  
38  
39  
40  
41  
42  
43  
44  
45  
46  
47  
48  
49  
50  
51  
52  
53  
54  
55  
56  
57  
58  
59  
60  
6. Dreser A, Vázquez-Vélez E, Treviño S, et al. Regulation of antibiotic sales in Mexico: an analysis of printed media coverage and stakeholder participation. BMC Public Health 2012 Dec;12 (1051).  
<http://www.biomedcentral.com/1471-2458/12/1051> (accessed 6 March 2013).
7. Federal Commission for Protection against Sanitary Risks (COFEPRIS). Strategies to regulate doctor's offices adjacent to private pharmacies. <http://www.cofepris.gob.mx/Paginas/Inicio.aspx>. (accessed 30 March 2014).
8. Rodwin M, Okamoto A. Physicians' conflicts of interest in Japan and the United States: lessons for the United States. J Health Polit Policy Law 2000; **25**: 343–375.
9. Kwon S. Pharmaceutical reform and physician strikes in Korea: separation of drug prescribing and dispensing. Soc Sci Med 2003;**57**: 529-538.
10. Liu X, Mills A. The influence of bonus payments to doctors on hospital revenue: results of a quasi-experimental study. Appl Health Econ Health Policy 2003;2:91-98.
11. Sun Q, Santoro MA, Meng Q, et al. Pharmaceutical policy in China. Health Aff (Millwood) 2008;**27**:1042-1050.
12. Trap B, Hansen EH, Hogerzeil H. Prescription habits of dispensing and non-dispensing doctors in Zimbabwe. Health Policy Plan 2002; **17**: 288–295.
13. Park S, Soumerai SB, Adams AS, et al. Antibiotic use following a Korean national policy to prohibit medication dispensing by physicians. Health Policy Plan 2005;**20**: 302-309.

- 1  
2  
3 14. Chou YJ, Yip WC, Lee CH, et al. Impact of separating drug prescribing and  
4 dispensing on provider behaviour: **Taiwan's** experience. Health Policy  
5 Planning 2003;**18**: 316-329.  
6  
7  
8  
9  
10 15. Romero-Martínez M, Shamah-Levy T, Franco-Núñez A, et al. National  
11 Health and Nutrition Survey 2012: design and coverage. Salud Publica Mex  
12 2013; **55**:S332-S340.  
13  
14  
15  
16  
17 16. Brown C, Pagán J, Rodríguez-Oreggia E. The decision-making process of  
18 health-care utilization in Mexico. Health Policy 2005;**72**: 81-91.  
19  
20  
21  
22 17. López-Ceballos D, Chi C. Health-care utilization in Ecuador: a multilevel  
23 analysis of socio-economic determinants and inequality issues. Health  
24 Policy Plan 2010; **25**: 209-218.  
25  
26  
27  
28  
29 18. Valdivia M. Public health infrastructure and equity in the utilization of  
30 outpatient health-care services in Peru. Health Policy Plan 2002;**17**: 12-19.  
31  
32  
33  
34 19. Comisión Nacional para el Desarrollo de los Pueblos Indígenas (CDI). Los  
35 hogares y la población indígena.  
36  
37  
38 [http://www.cdi.gob.mx/index.php?id=211&option=com\\_content&task=view,](http://www.cdi.gob.mx/index.php?id=211&option=com_content&task=view)  
39 2009 (accessed 6 March 2013).  
40  
41  
42  
43 20. Consejo Nacional de Población (CONAPO). Índice de marginación por  
44 localidad. <http://www.conapo.gob.mx/es/CONAPO> (accessed 20 March  
45 2013).  
46  
47  
48  
49  
50 21. Kolenikov S, Angeles G. The use of discrete data in PCA: theory,  
51 simulations, and applications to socioeconomic indices. Chapel Hill:  
52 Carolina Population Center, University of North Carolina, 2004.  
53  
54  
55  
56  
57  
58  
59  
60



- 1  
2  
3  
4  
5  
6  
7  
8  
9  
10  
11  
12  
13  
14  
15  
16  
17  
18  
19  
20  
21  
22  
23  
24  
25  
26  
27  
28  
29  
30  
31  
32  
33  
34  
35  
36  
37  
38  
39  
40  
41  
42  
43  
44  
45  
46  
47  
48  
49  
50  
51  
52  
53  
54  
55  
56  
57  
58  
59  
60
22. McKenzie DJ. Measuring inequality with asset indicators. *J Popul Econ* 2005; 2(229).  
<http://siteresources.worldbank.org/DEC/Resources/finaljpopmckenzie1.pdf>.  
(accessed 2 February 2013).
23. Hosmer D, Lemeshow S. *Applied Logistic Regression*. Second Ed., Canada: Wiley Series in Probability and Statistics, 2000.
24. Ministry of Health. Health Sector Program 2013-2018. *Diario Oficial de la Federación* 12.12.2013. México, 2013.
25. Muñoz O, Rodríguez-Ortega E, Pérez-Cuevas R, et al. Propuesta de un Sistema Nacional de Servicios de Salud: componente de salud de una propuesta de seguridad social universal. Documento elaborado por el Centro de Estudios Económicos y Sociales en Salud (CEESES) del Hospital Infantil de México Federico Gómez (HIMFG) para el Consejo Nacional de Evaluación de la Política de Desarrollo Social (CONEVAL). México: UNAM, Seminario sobre Medicina y Salud, 2012.
26. *Farmacopea de los Estados Unidos Mexicanos*. Suplemento para establecimientos dedicados a la venta y suministro de medicamentos y otros insumos para la salud. México: Secretaría de Salud, 2010.
27. Brody H. Professional medical organizations and commercial conflicts of interest: ethical issues. *Ann Fam Med* 2010;**8**:354-358.
28. Leyva-Piña MA, Pichardo-Palacios S. Los médicos de las Farmacias Similares: Degradación de la profesión médica? *Polis* 2012;**8**:143-175.
29. Iizuka T. Experts' agency problems: evidence from the prescription drug market in Japan. *Rand J Econ* 2007;**38**:844-862.

1  
2  
3  
4  
5  
6  
7  
8  
9  
10  
11  
12  
13  
14  
15  
16  
17  
18  
19  
20  
21  
22  
23  
24  
25  
26  
27  
28  
29  
30  
31  
32  
33  
34  
35  
36  
37  
38  
39  
40  
41  
42  
43  
44  
45  
46  
47  
48  
49  
50  
51  
52  
53  
54  
55  
56  
57  
58  
59  
60

**30.** Spurling GK, Mansfield PR, Montgomery BD, et al. Information from pharmaceutical companies and the quality, quantity, and cost of physicians' prescribing: a systematic review. PLoS Med 2010 Oct;7 (10): e1000352. <http://www.plosmedicine.org/article/info%3Adoi%2F10.1371%2Fjournal.pmed.1000352> (accessed 15 January 2013).

**31.** Watts JJ, Segal L. Market failure, policy failure and other distortions in chronic disease markets. BMC Health Serv Res 2009 Jun;9:102.

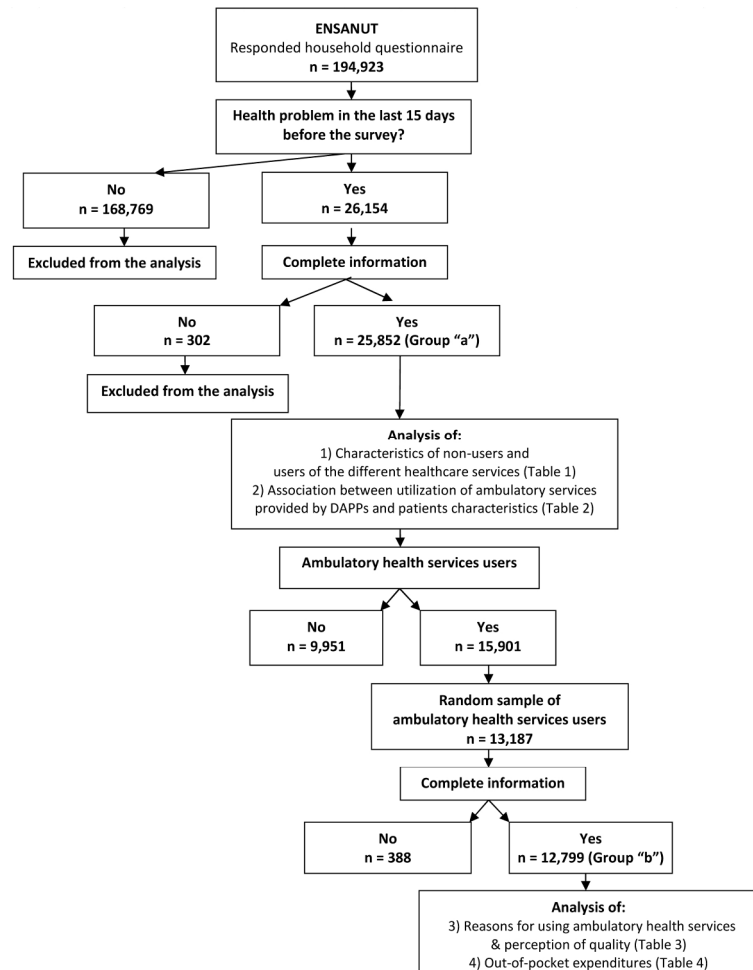

Selection of study population  
173x231mm (300 x 300 DPI)
